# Supplementary material for: Integrated N- and O-Glycomics of Acute Myeloid Leukemia (AML) Cell Lines
Source: MDPI journal article supplement (doi:10.3390/cells10113058), 2021-11-06

# Supplementary Information 2

## O-Glycomics – Structural Elucidation

### Integrated N- and O-Glycomics of Acute Myeloid Leukemia (AML) Cell Lines

Constantin Blöchl <sup>1,2</sup>, Di Wang <sup>1</sup>, Katarina Madunic <sup>1</sup>, Guinevere S. M. Lageveen-Kammeijer <sup>1</sup>, Christian G. Huber <sup>2,3,\*</sup>, Manfred Wuhrer <sup>1,\*</sup> and Tao Zhang <sup>1,\*</sup>

<sup>1</sup> Center for Proteomics and Metabolomics, Leiden University Medical Center, Albinusdreef 2, Leiden, the Netherlands; [constantin.bloechl@sbg.ac.at](mailto:constantin.bloechl@sbg.ac.at), [d.wang@lumc.nl](mailto:d.wang@lumc.nl), [k.madunic@lumc.nl](mailto:k.madunic@lumc.nl), [g.s.m.kammeijer@lumc.nl](mailto:g.s.m.kammeijer@lumc.nl), [m.wuhrer@lumc.nl](mailto:m.wuhrer@lumc.nl), [t.zhang@lumc.nl](mailto:t.zhang@lumc.nl)

<sup>2</sup> Department of Biosciences, University of Salzburg, Hellbrunnerstrasse 34, Salzburg, Austria; [constantin.bloechl@sbg.ac.at](mailto:constantin.bloechl@sbg.ac.at), [c.huber@sbg.ac.at](mailto:c.huber@sbg.ac.at)

<sup>3</sup> Cancer Cluster Salzburg, Department of Biosciences, University of Salzburg, Hellbrunnerstrasse 34, Salzburg, Austria; [c.huber@sbg.ac.at](mailto:c.huber@sbg.ac.at)

\* Correspondence: [c.huber@sbg.ac.at](mailto:c.huber@sbg.ac.at), [m.wuhrer@lumc.nl](mailto:m.wuhrer@lumc.nl), [t.zhang@lumc.nl](mailto:t.zhang@lumc.nl)

# Glycan 1

## H1N1

Monoisotopic mass: 385.16 Da  
Charge observed: 1-  
Theoretical ion:  $m/z$  384.15  
Observed ion:  $m/z$  384.05  
Mass deviation:  $m/z$  0.10  
Retention time: 10.6 min

UniCarb-DB: #171

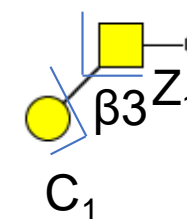

Depicted MS<sup>2</sup> was obtained from  
analysis of cell line: HL-60

20210113\_CoB-D7\_AML4\_100um\_O\_HL60\_BR1\_r01\_4ul\_100um-0.6ul-min-120min-900sps-IPA-3LMIN-042: -All MSn, CID, 9.8-11.9min #304-371

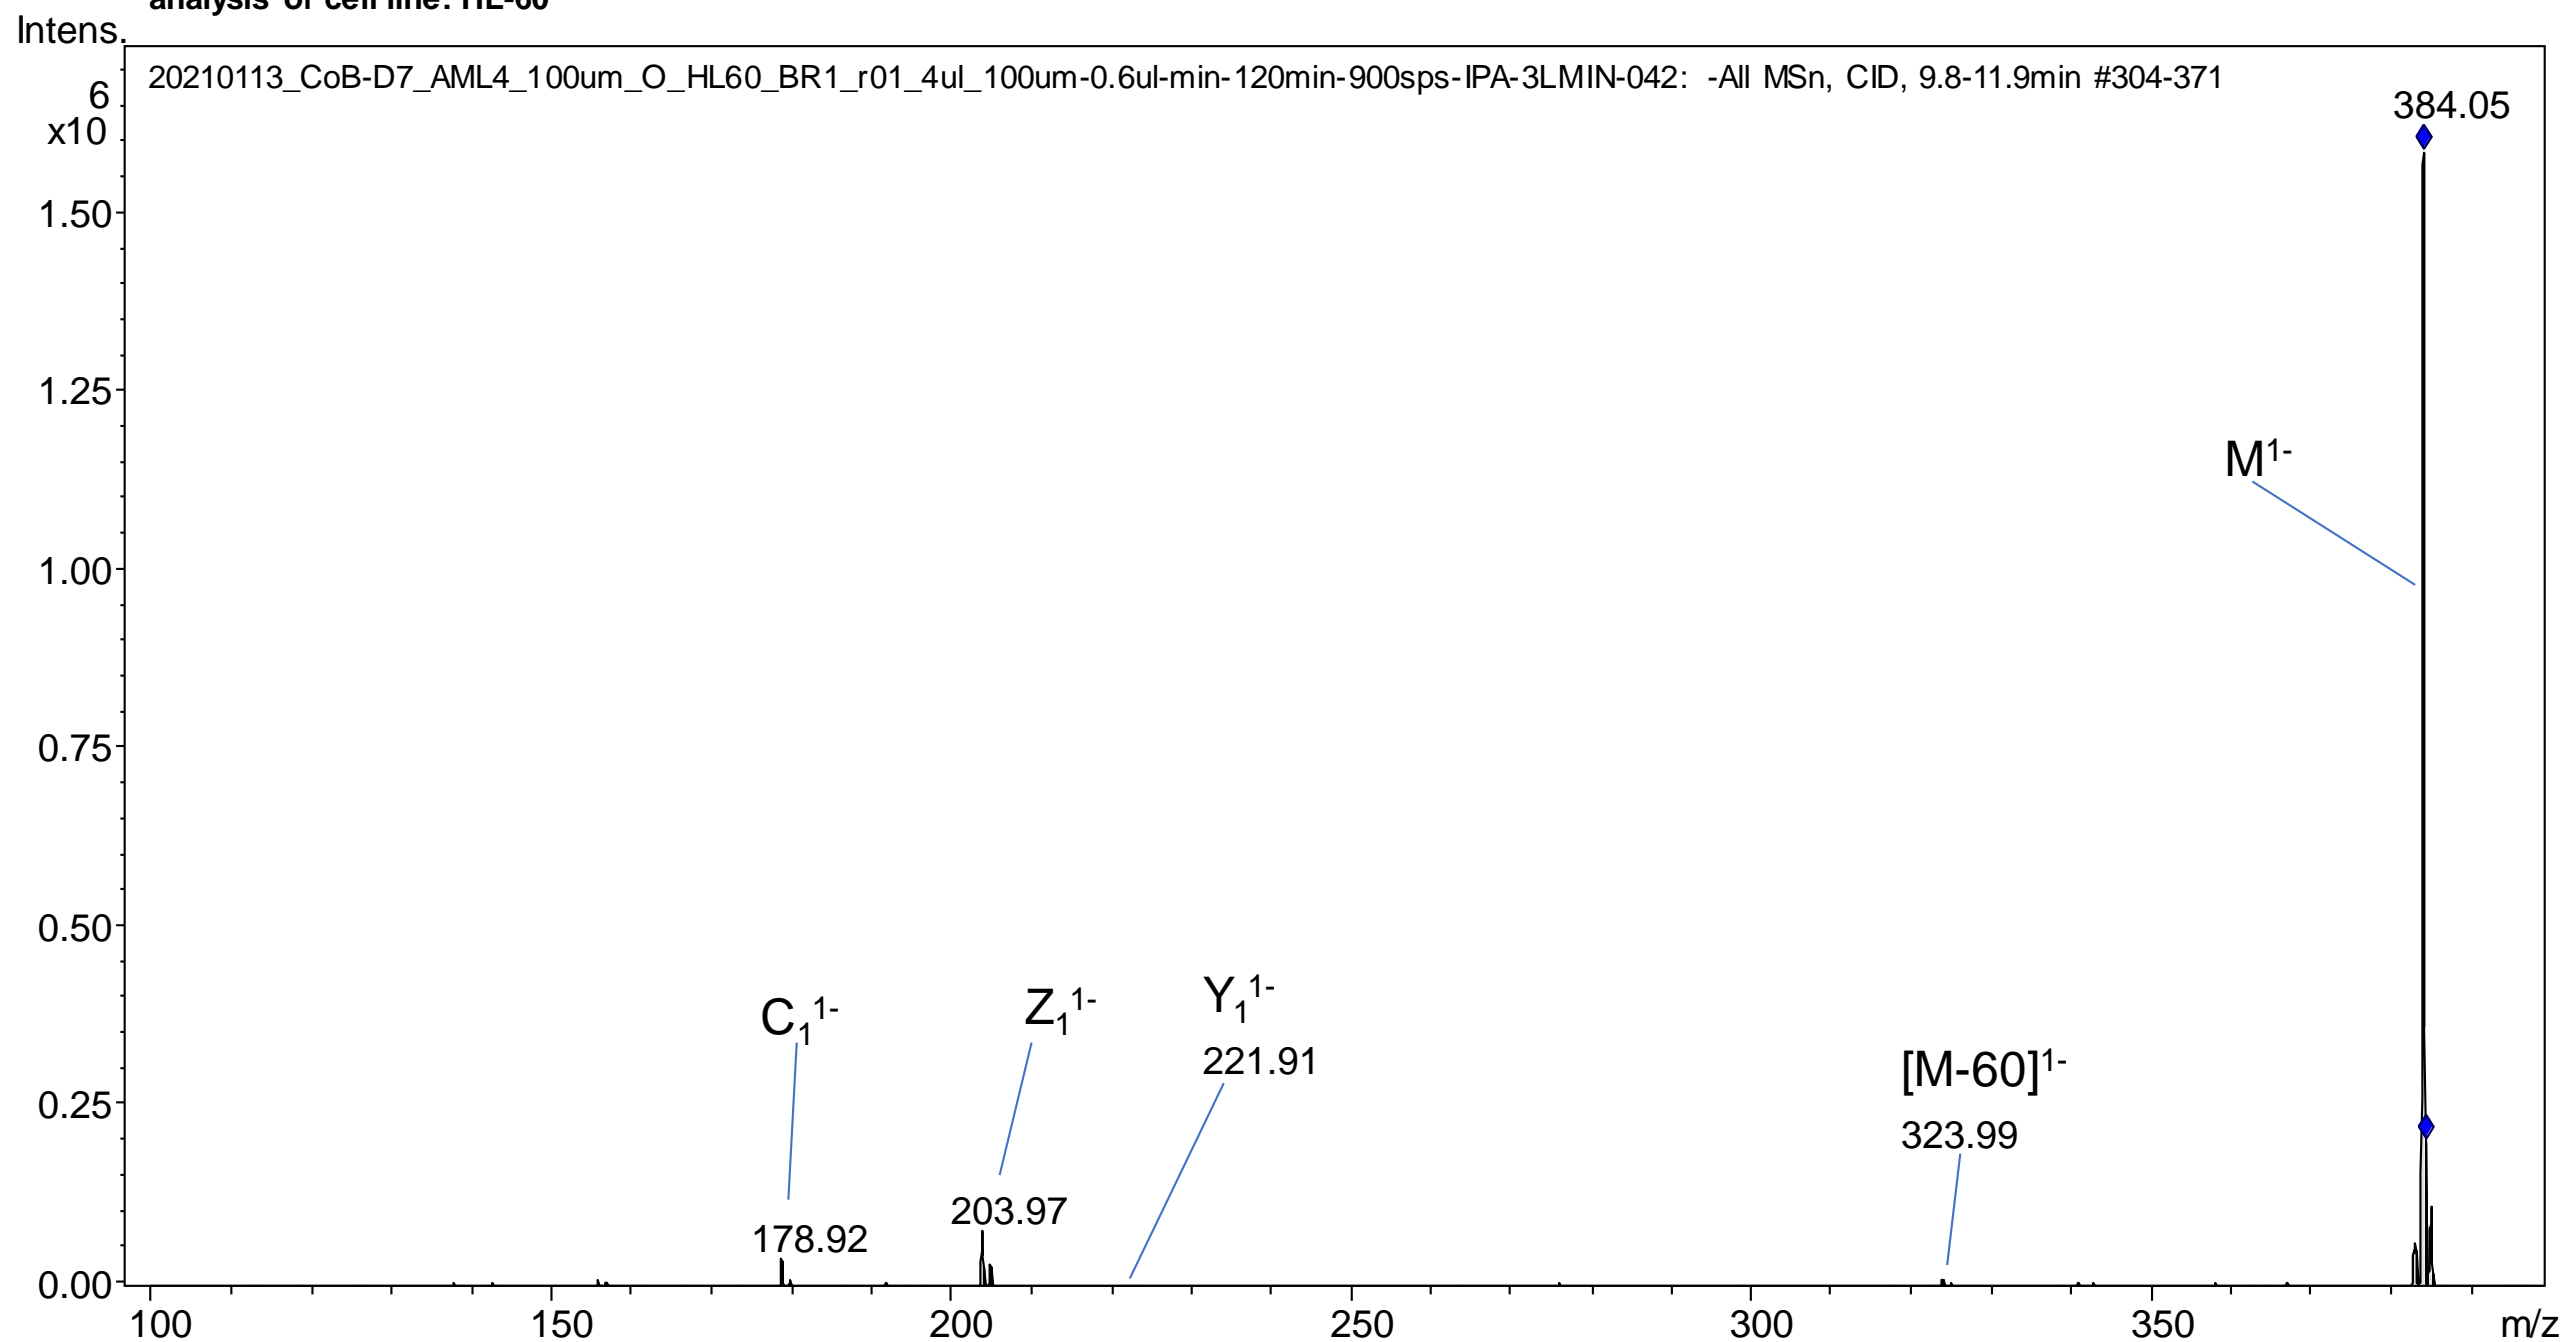

# Glycan 2

## H1N2

Depicted MS<sup>2</sup> was obtained from  
analysis of cell line: HL-60

Monoisotopic mass: 588.24 Da  
Charge observed: 1-  
Theoretical ion: *m/z* 587.23  
Observed ion: *m/z* 587.19  
Mass deviation: *m/z* 0.04  
Retention time: 33.3 min

UniCarb-DB: #177

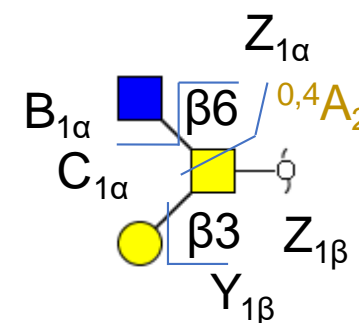

Intens.

20210113\_CoB-D7\_AML4\_100um\_O\_HL60\_BR1\_r01\_4ul\_100um-0.6ul-min-120min-900sps-IPA-3LMIN-042: -All MSn, CID, 33.2-33.5min #1046-1058

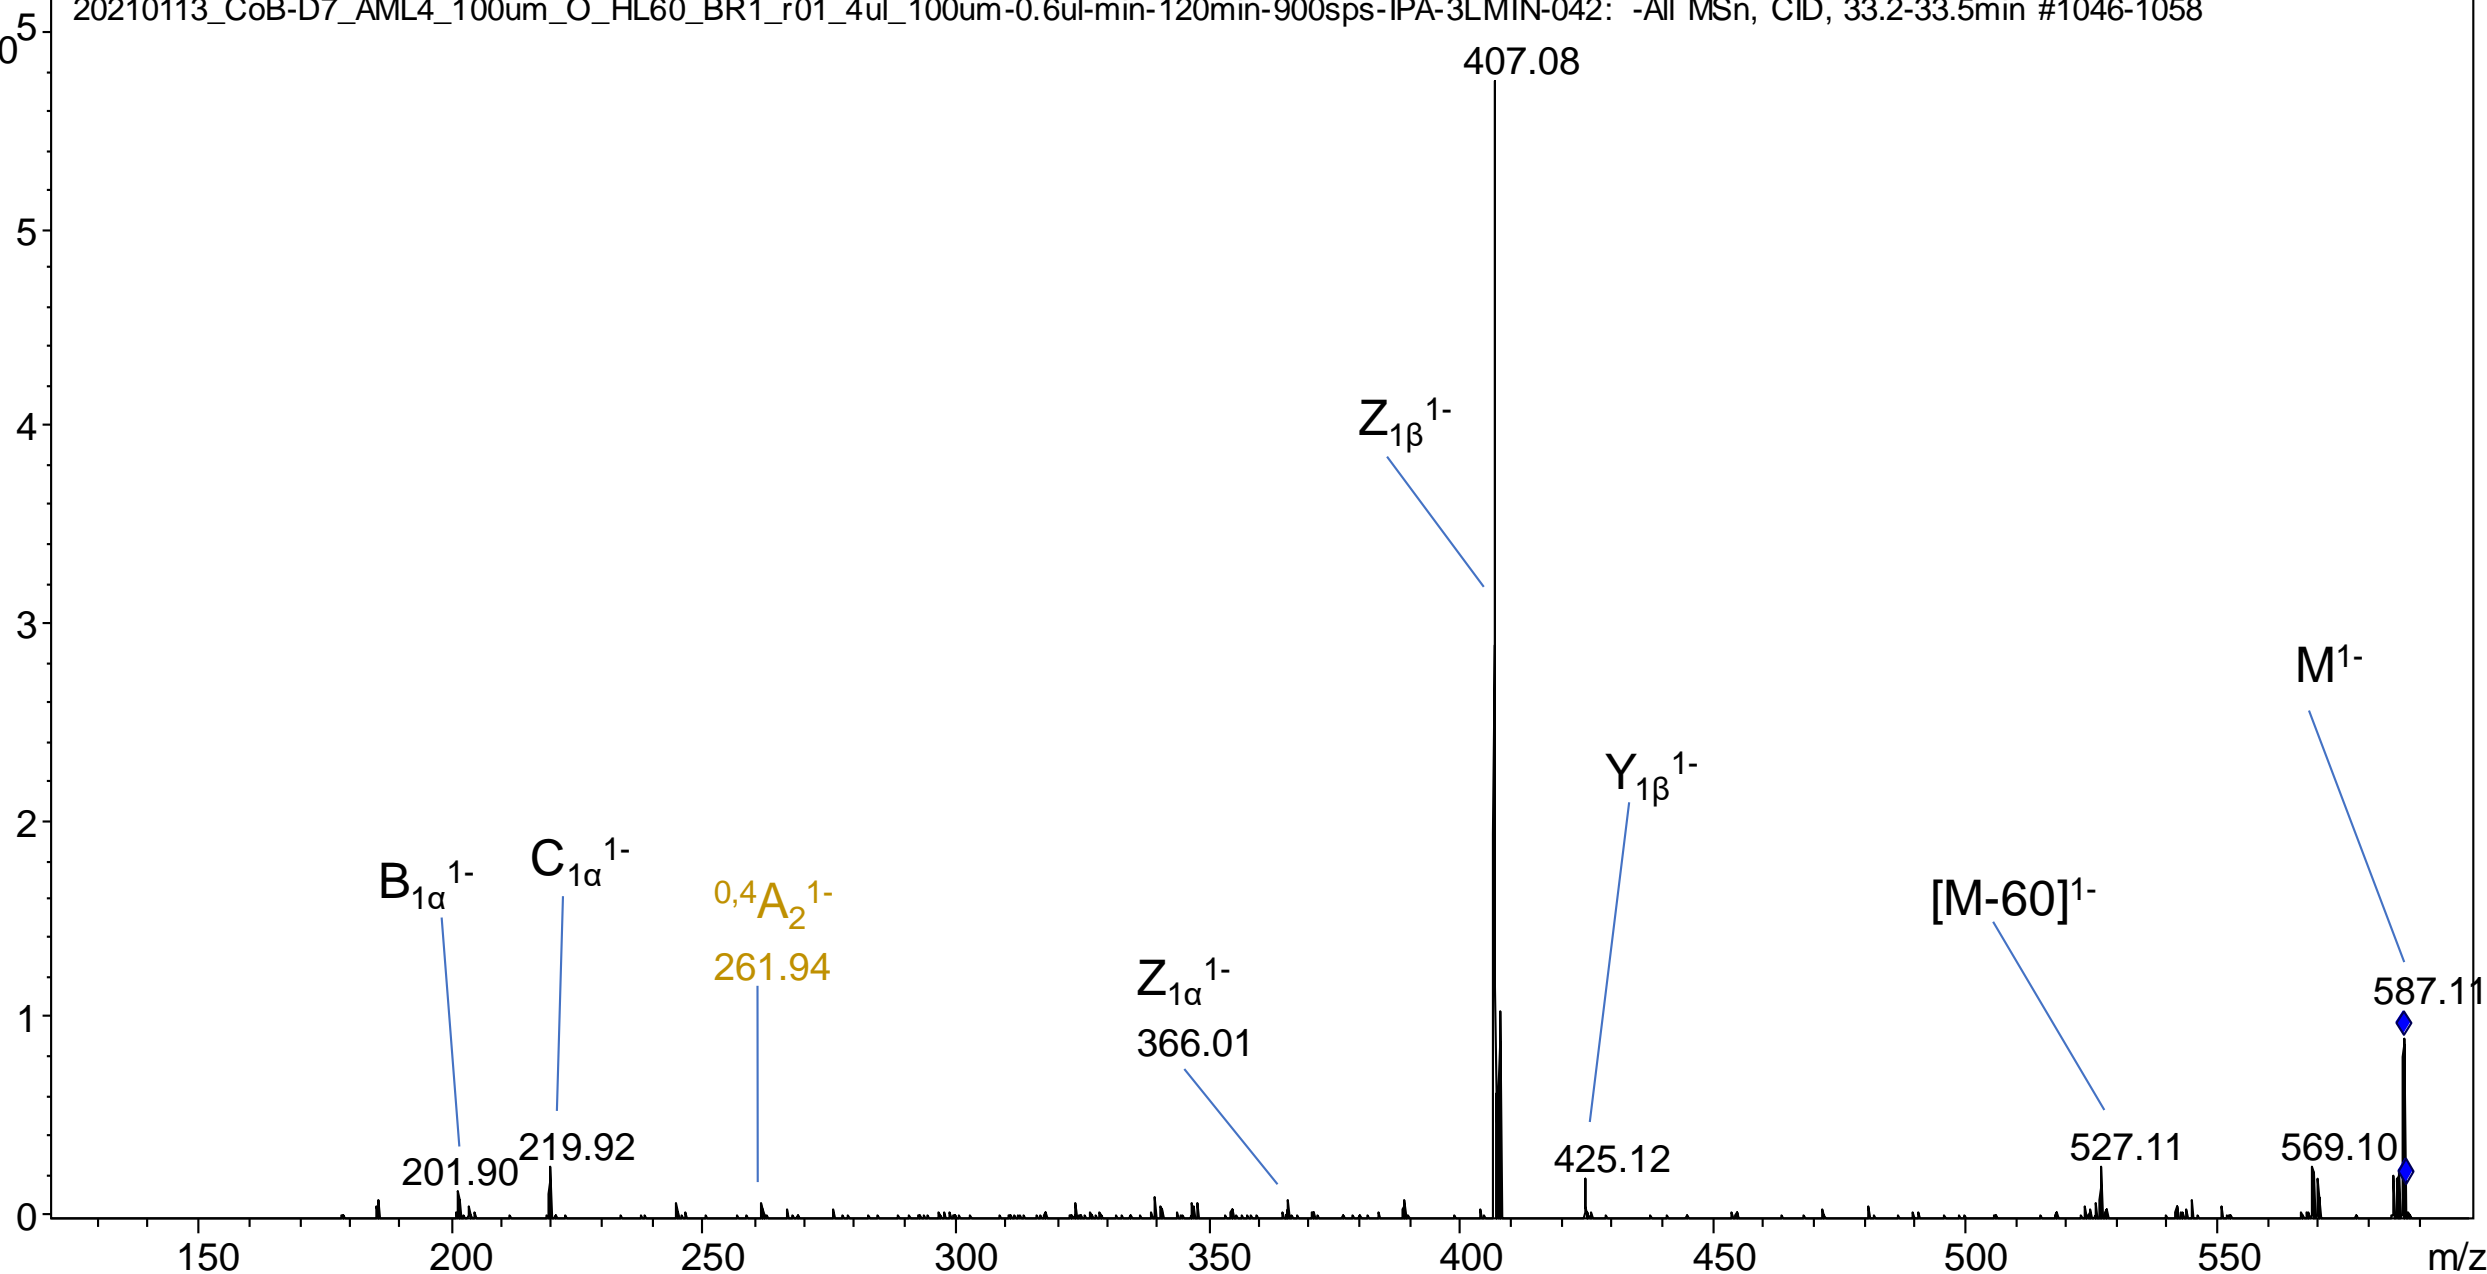

# Glycan 3

H1N2Su1

Depicted MS<sup>2</sup> was obtained from  
analysis of cell line: MV4-11

Monoisotopic mass: 668.20 Da  
Charge observed: 1-  
Theoretical ion: *m/z* 667.19  
Observed ion: *m/z* 667.11  
Mass deviation: *m/z* 0.07  
Retention time: 35.0 min

UniCarb-DB: #3039

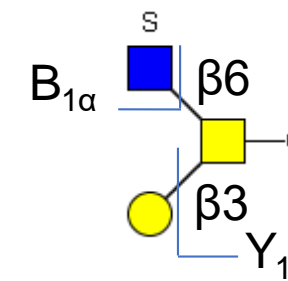

Intens.

20210113\_CoB-D10\_AML4\_100um\_O\_MV4-11\_BR1\_r01\_4ul\_100um-0.6ul-min-120min-900sps-IPA-3LMIN-021: -All MSn, CID, 34.9-35.4min #1103-1118

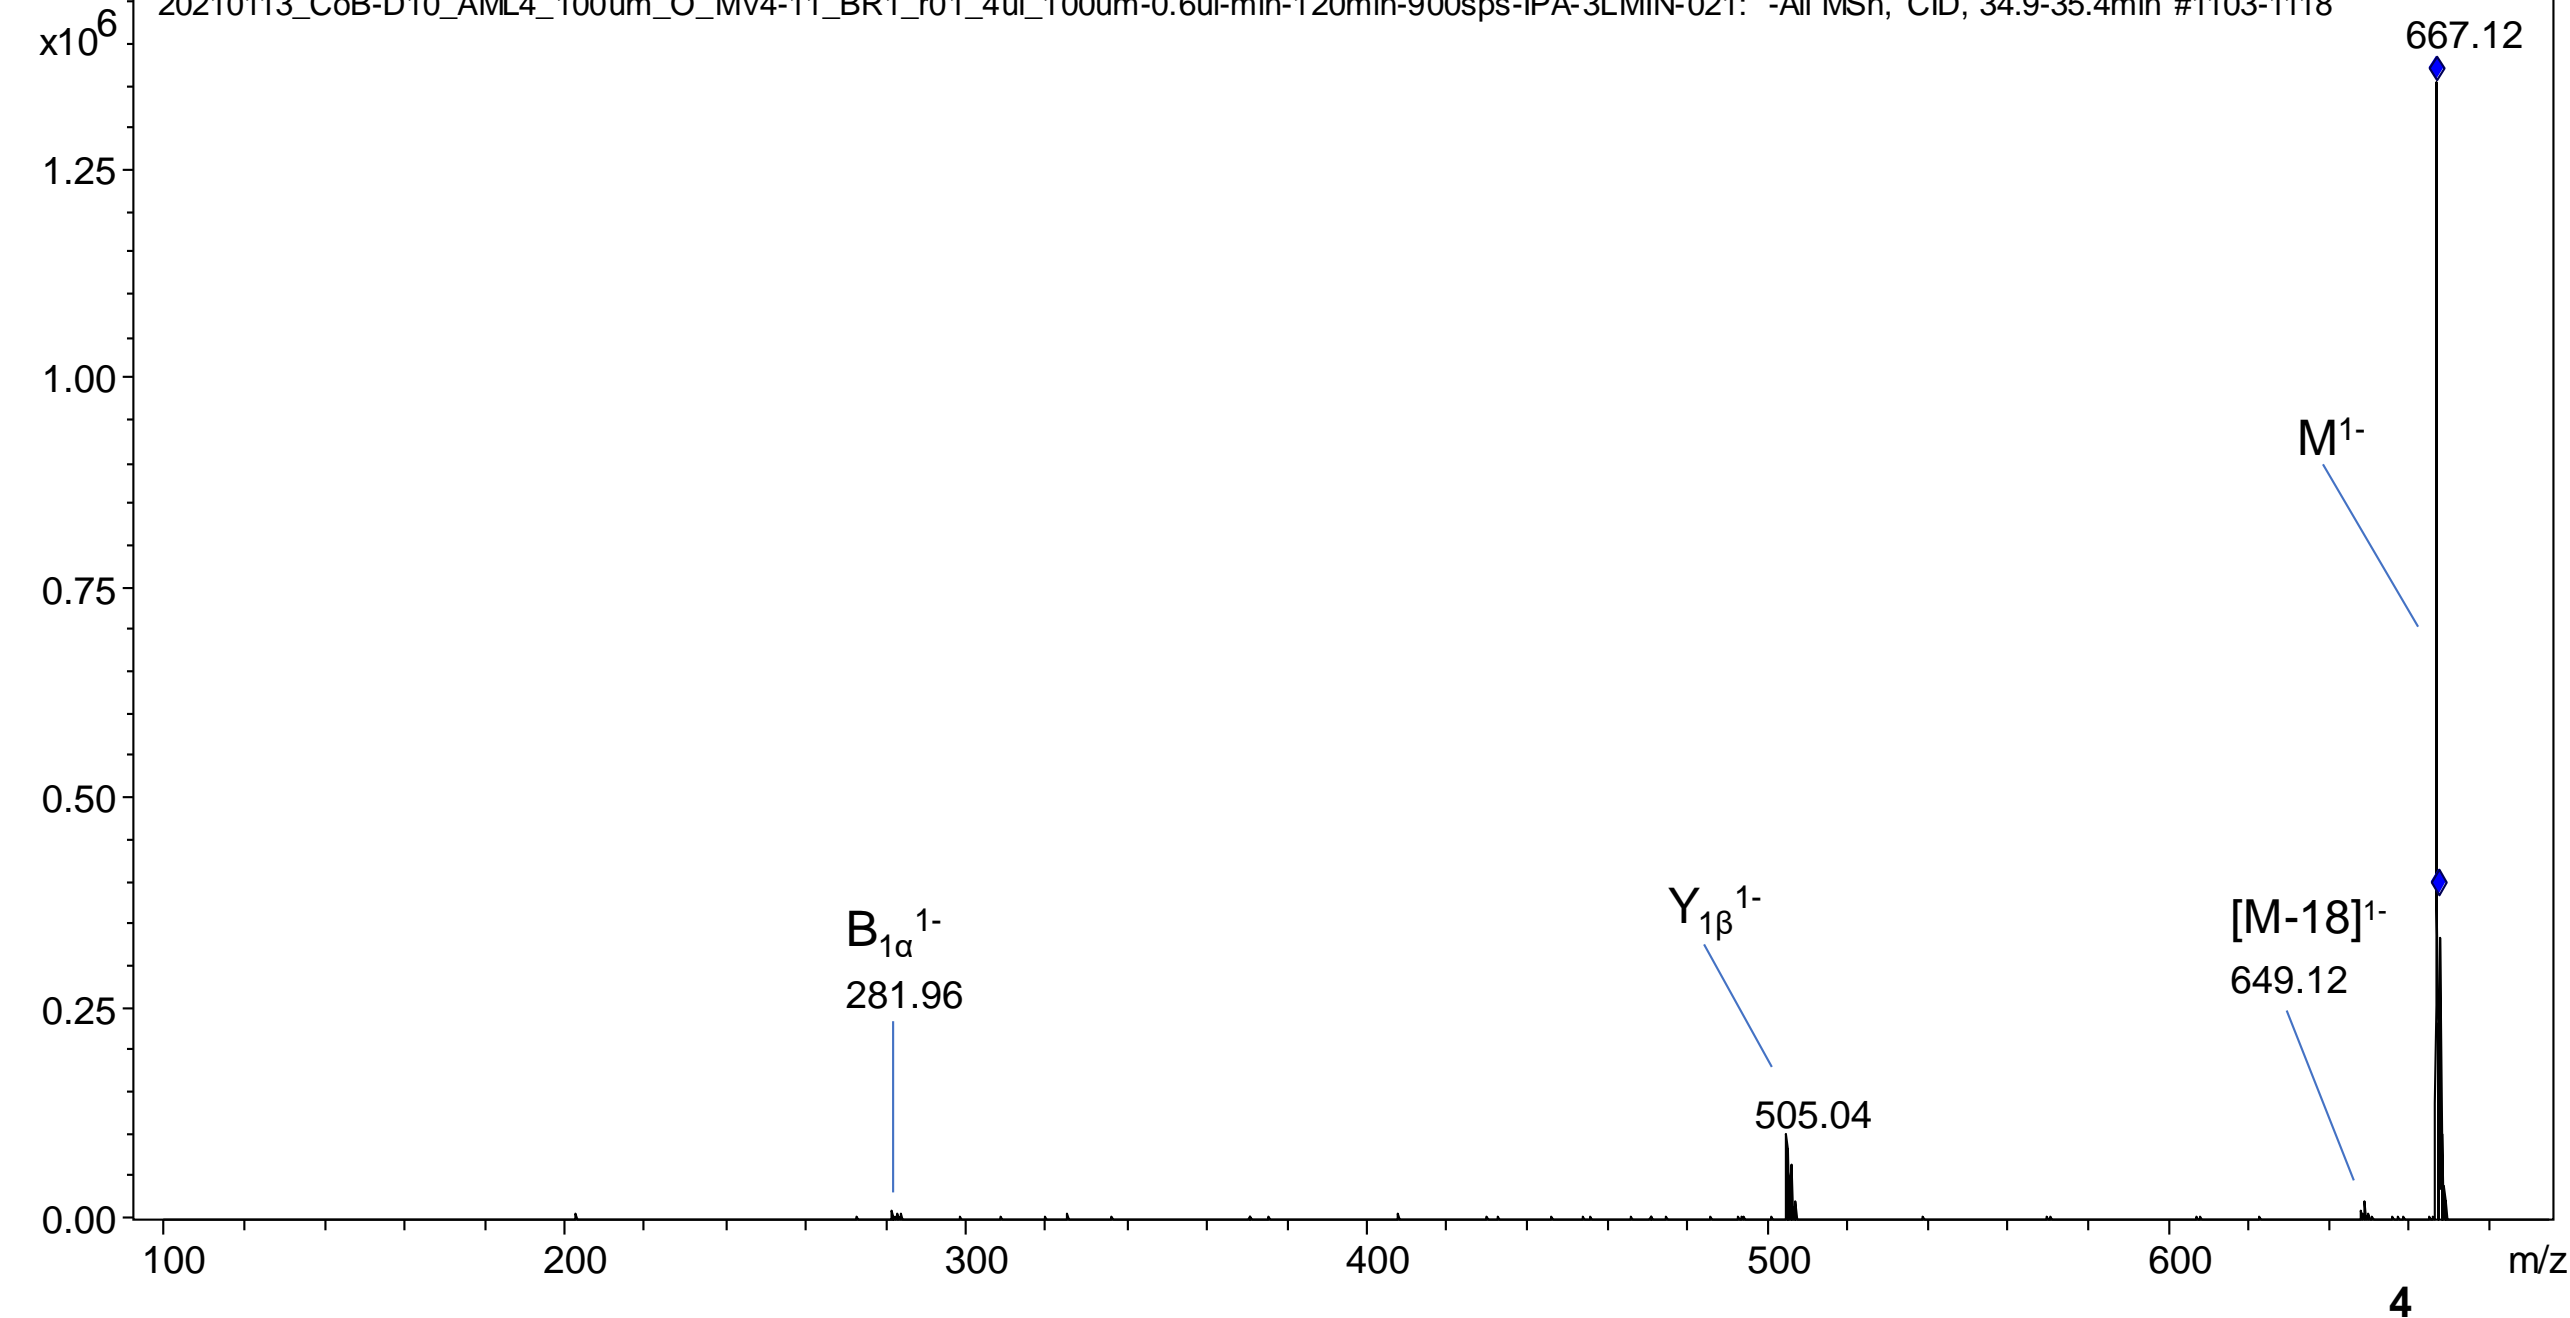

# Glycan 4a

## H1N1S1

Depicted MS<sup>2</sup> was obtained from  
analysis of cell line: TF-1

Monoisotopic mass: 676.26 Da  
Charge observed: 1-  
Theoretical ion: *m/z* 675.25  
Observed ion: *m/z* 675.17  
Mass deviation: *m/z* 0.08  
Retention time: 30.1 min  
Note:  $\alpha$ -2,6 linkage of sialic acid confirmed  
by neuraminidase S and A treatment

UniCarb-DB: #41

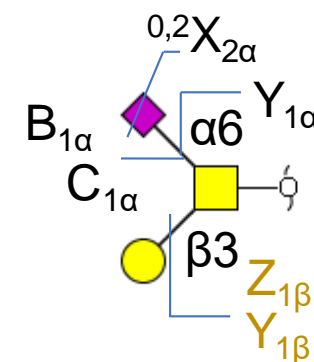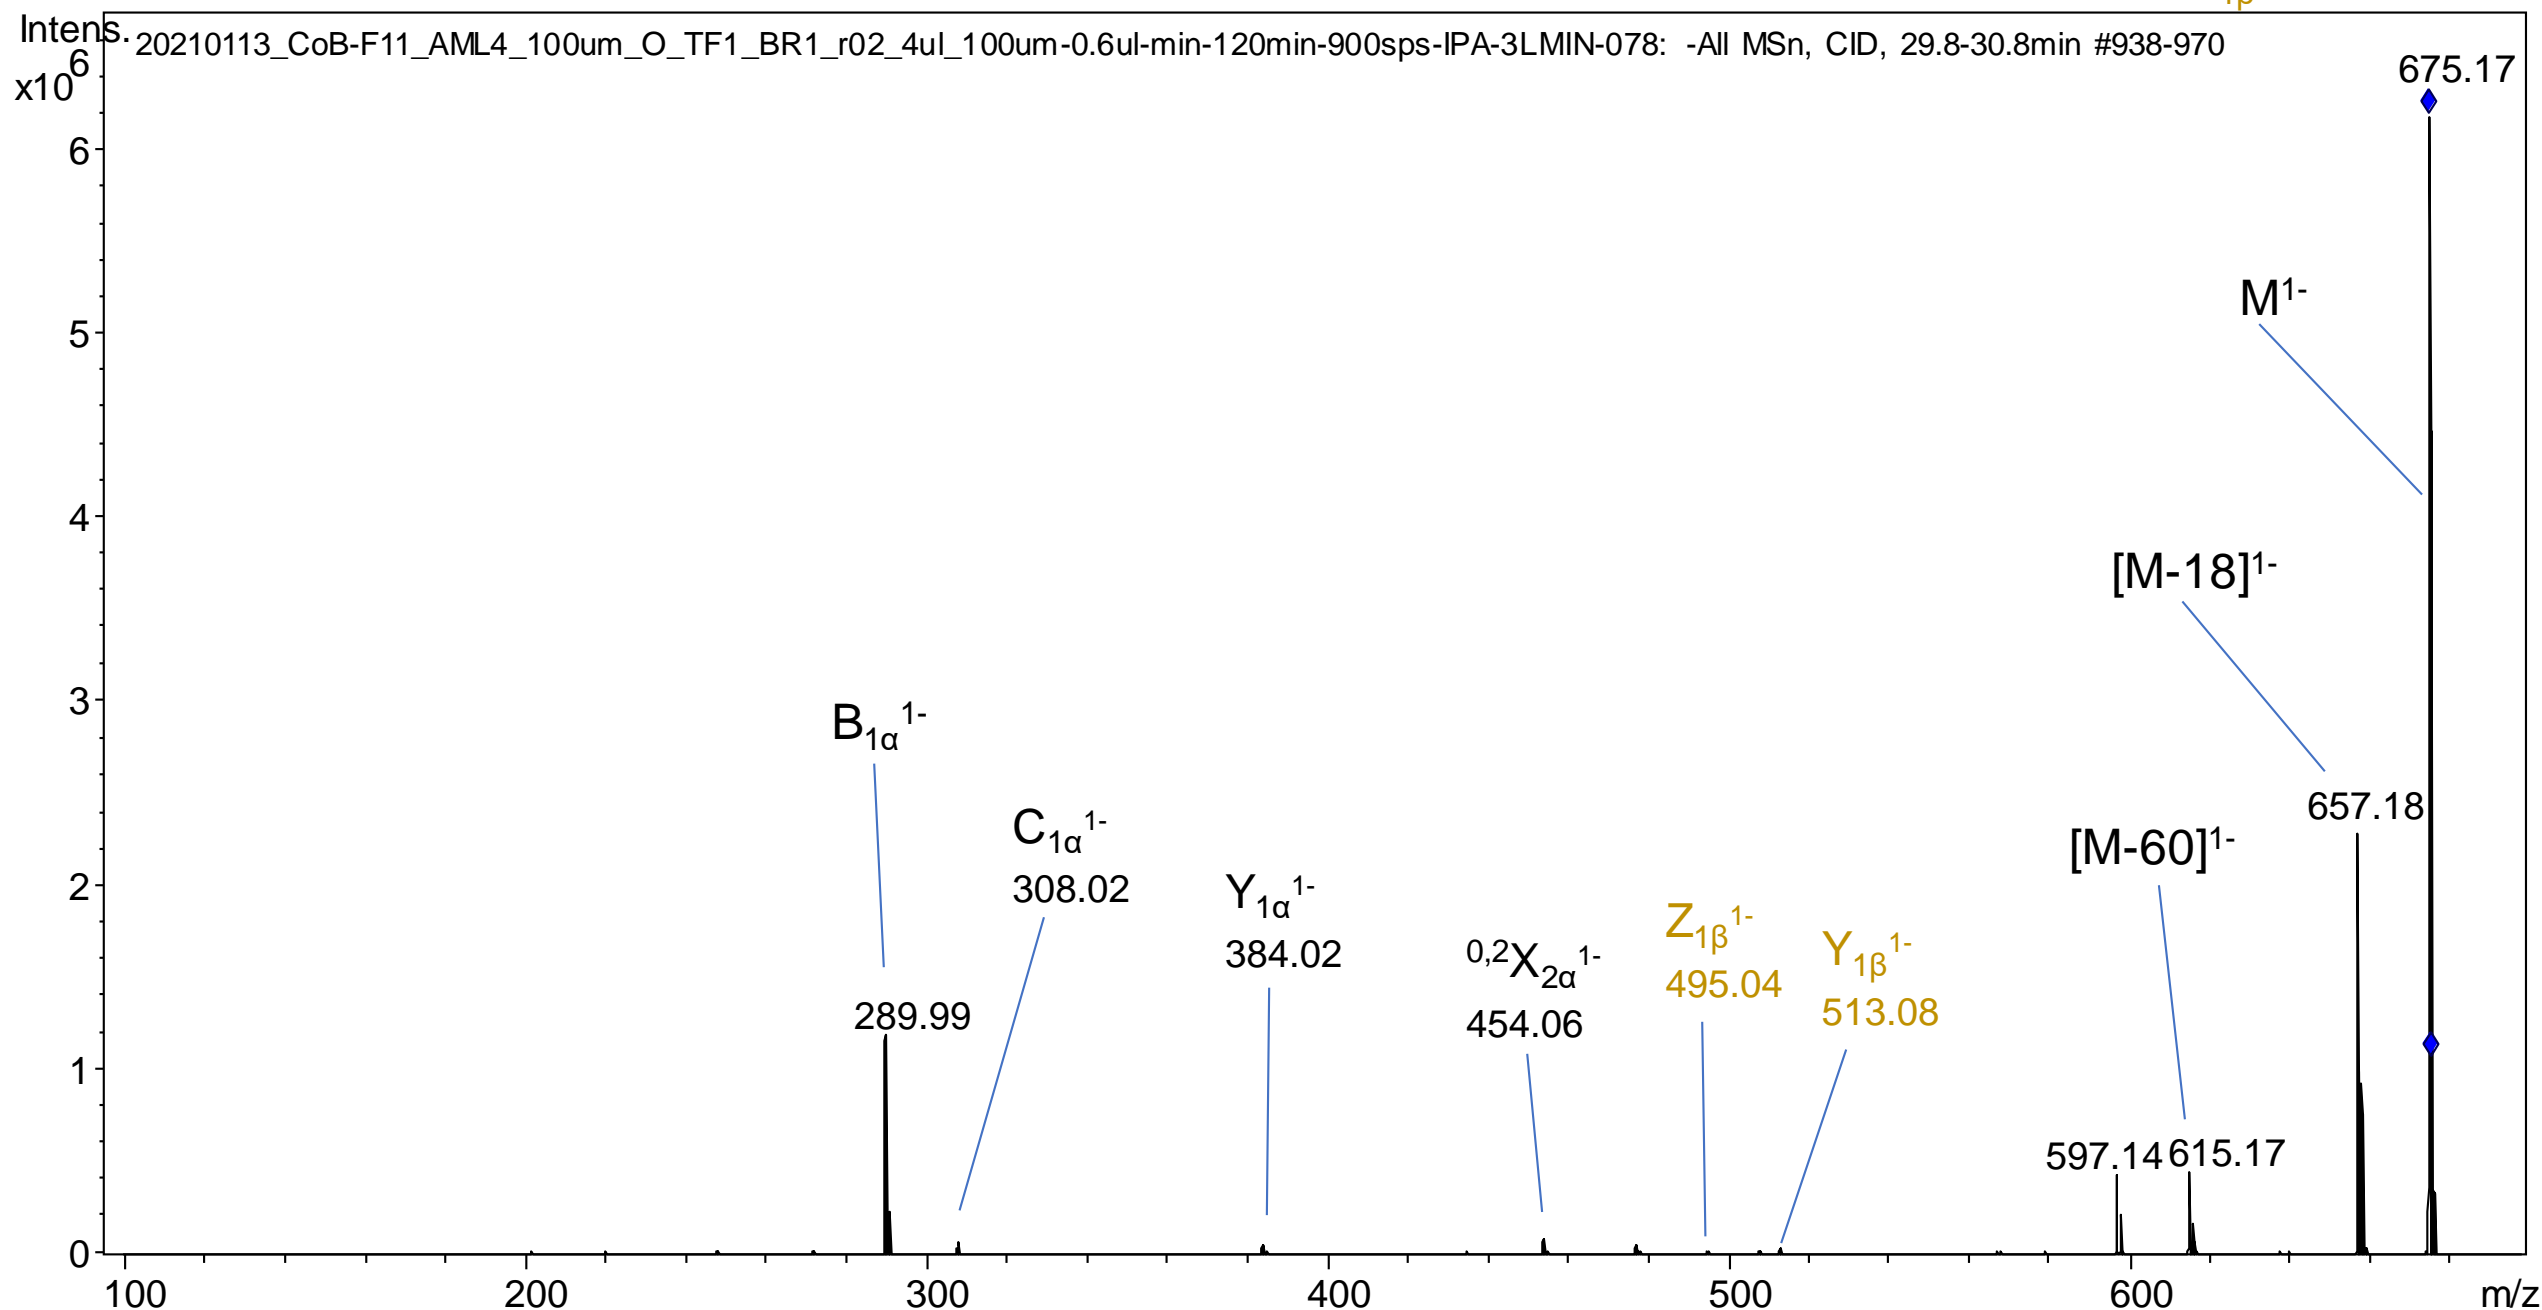

# Glycan 4b

## H1N1S1

Depicted MS<sup>2</sup> was obtained from  
analysis of cell line: TF-1

Monoisotopic mass: 676.26 Da  
Charge observed: 1-  
Theoretical ion: *m/z* 675.25  
Observed ion: *m/z* 675.18  
Mass deviation: *m/z* 0.07  
Retention time: 37.1 min  
Note:  $\alpha$ -2,3 linkage of sialic acid confirmed  
by neuraminidase S and A treatment

UniCarb-DB: #146

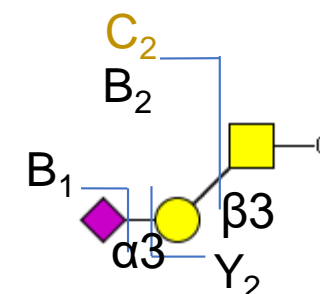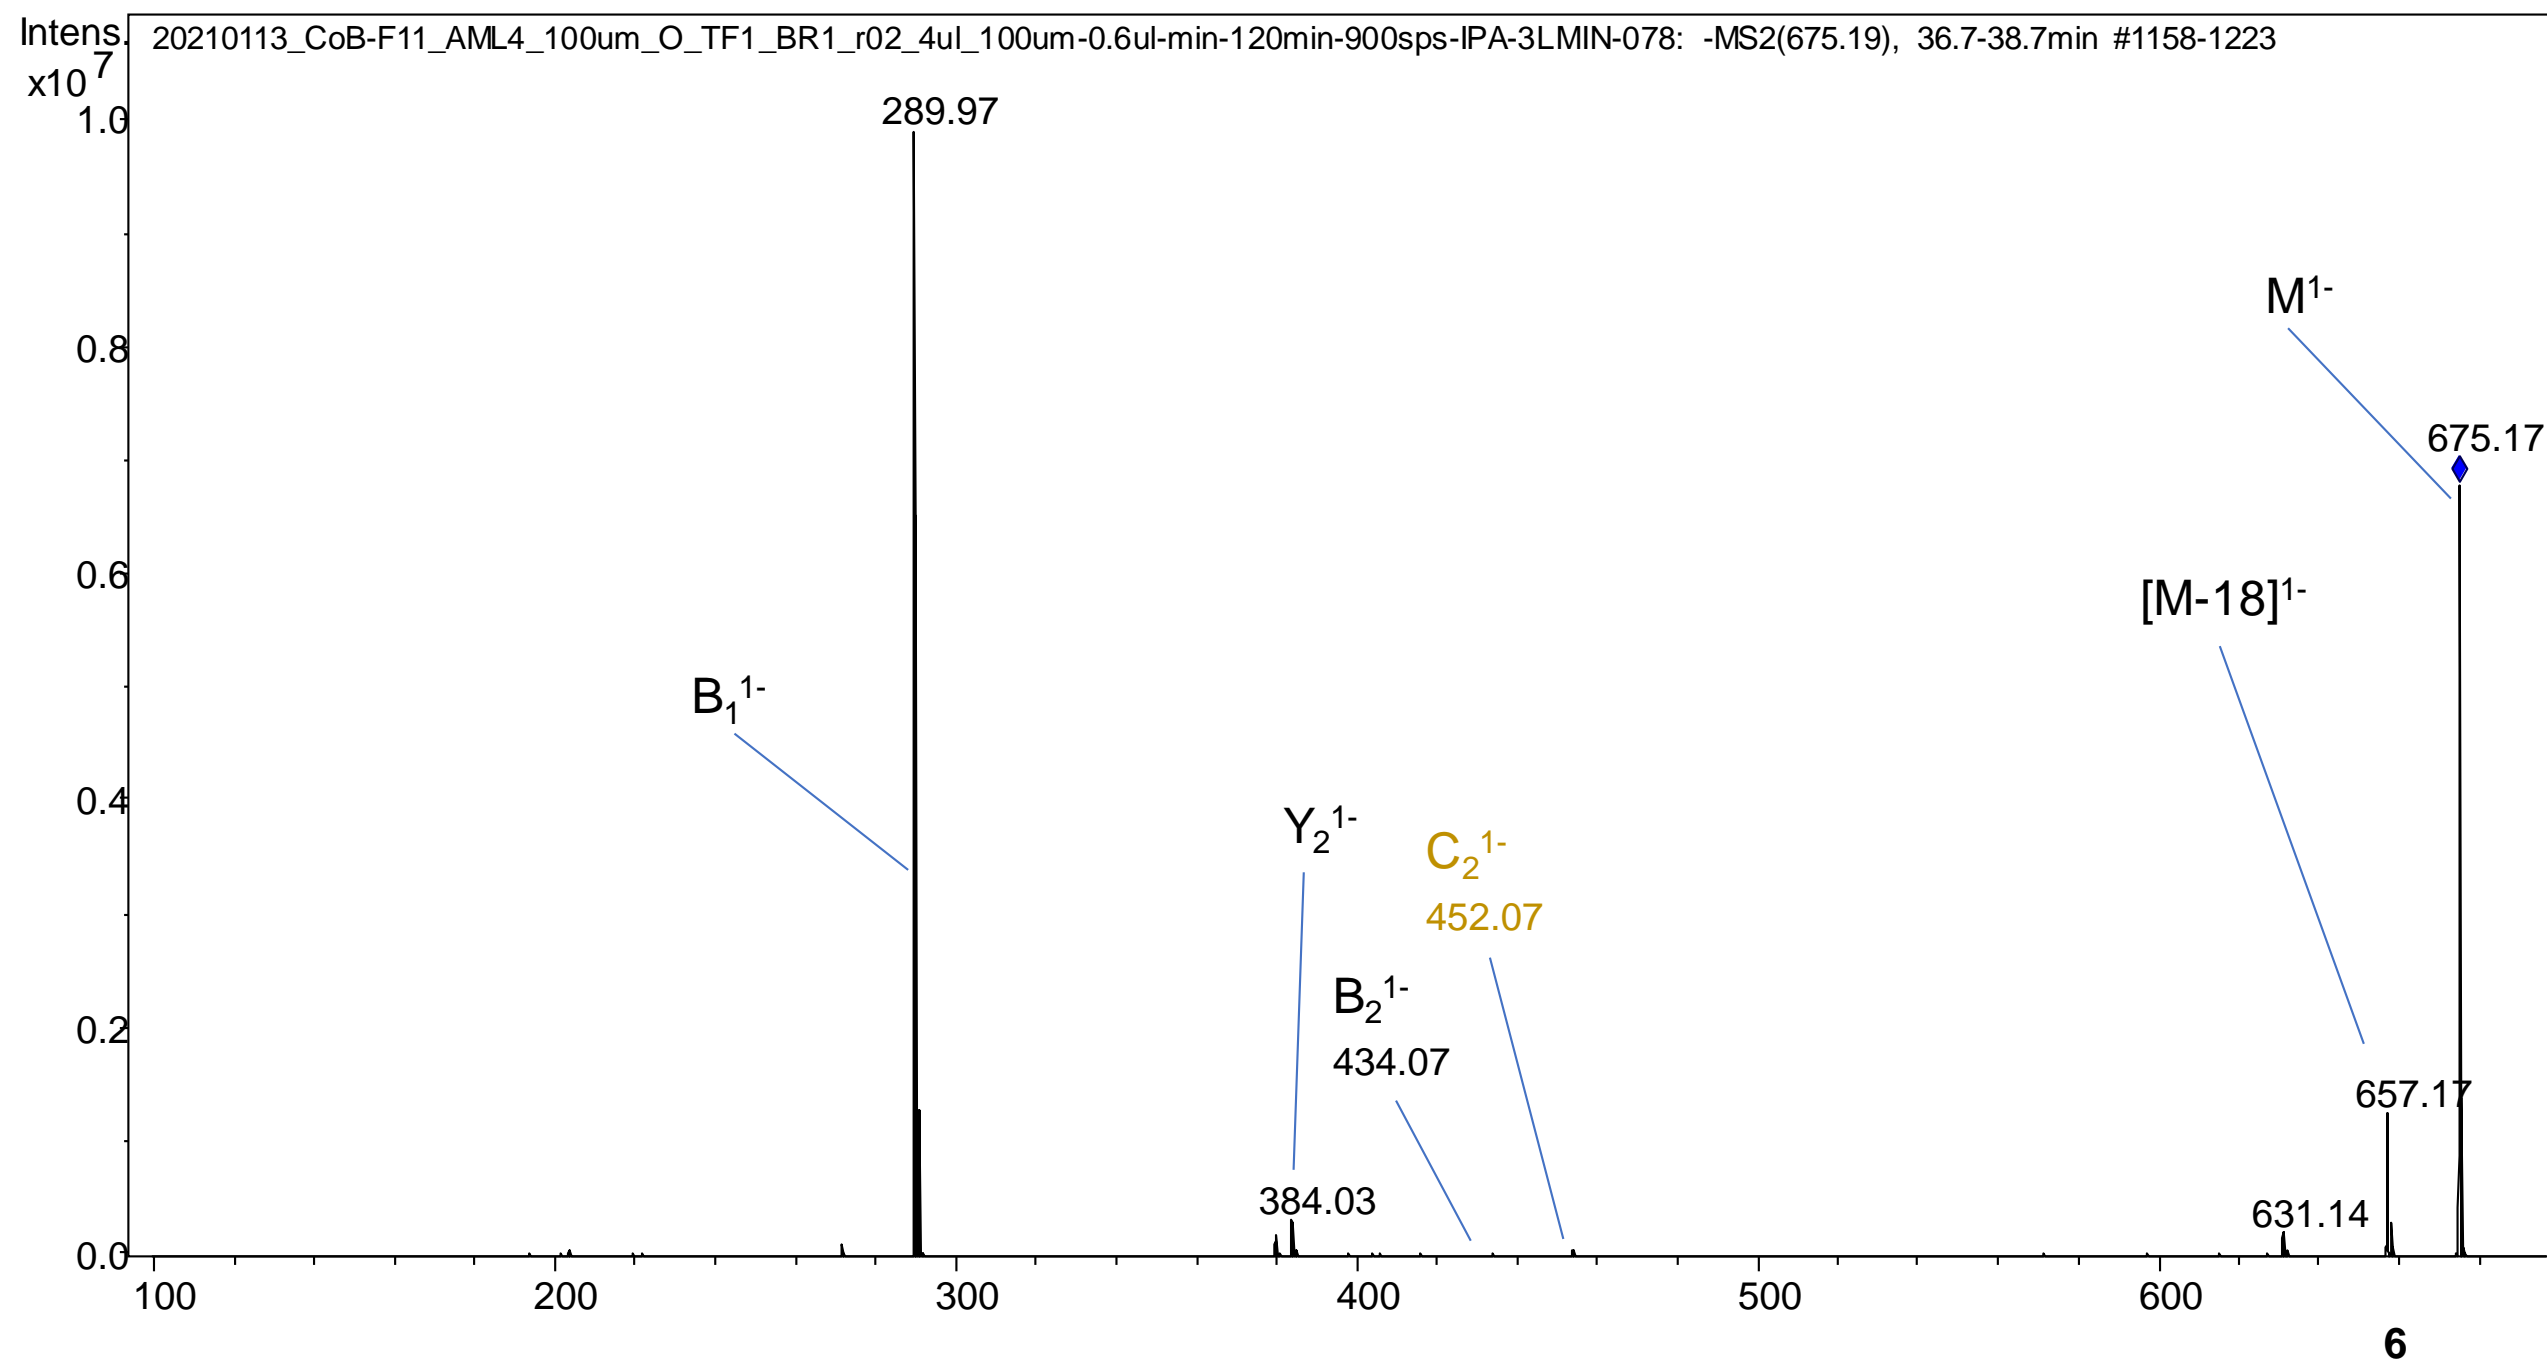

$$\text{H}_2\text{N}_2$$

|                           |                          |
|---------------------------|--------------------------|
| <b>Monoisotopic mass:</b> | <b>750.29 Da</b>         |
| <b>Charge observed:</b>   | <b>1-</b>                |
| <b>Theoretical ion:</b>   | <b><i>m/z</i> 749.28</b> |
| <b>Observed ion:</b>      | <b><i>m/z</i> 749.23</b> |
| <b>Mass deviation:</b>    | <b><i>m/z</i> 0.05</b>   |
| <b>Retention time:</b>    | <b>43.9 min</b>          |

Diagram illustrating a 2D hexagonal lattice structure. The nodes are labeled  $C_{1\alpha}$ ,  $B_{2\alpha}$ ,  $C_{1\beta}$ , and  $Y_{2\alpha}$ . The edges are labeled  $\beta_6$ ,  $\beta_3$ , and  $Y_{1\beta}$ . A yellow circle is labeled  $0,4A_3$ .

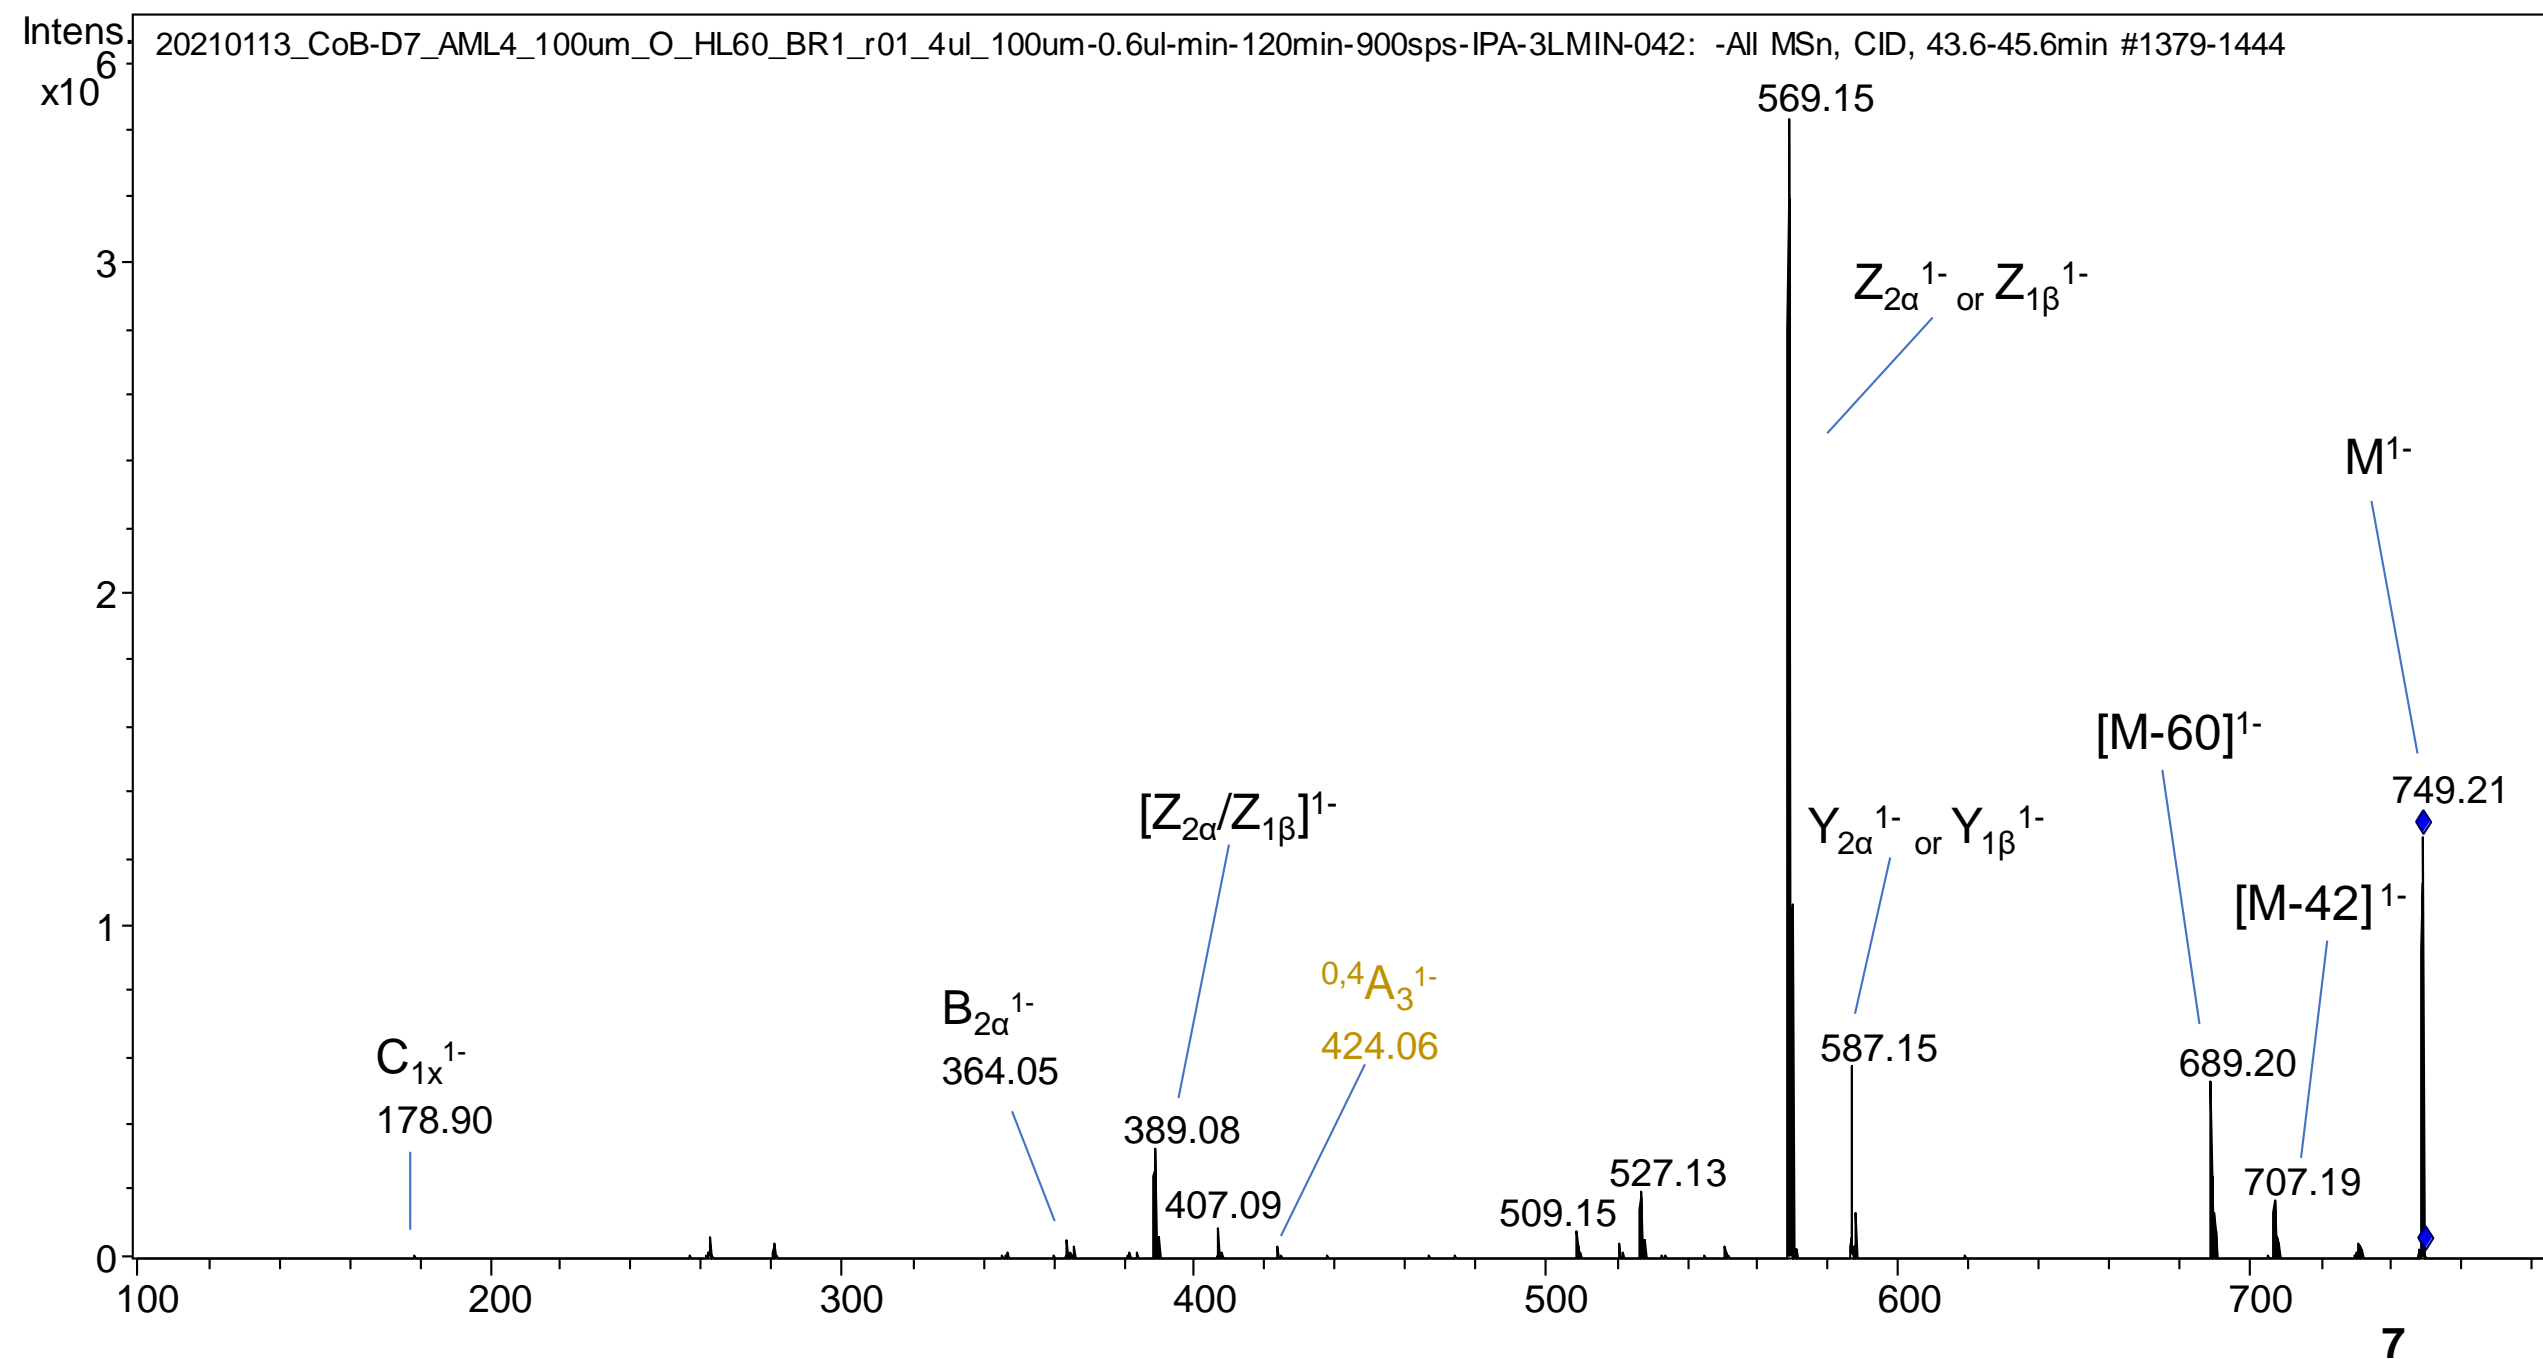

## H2N2Su1

|                           |                          |
|---------------------------|--------------------------|
| <b>Monoisotopic mass:</b> | <b>830.25 Da</b>         |
| <b>Charge observed:</b>   | <b>1-</b>                |
| <b>Theoretical ion:</b>   | <b><i>m/z</i> 829.24</b> |
| <b>Observed ion:</b>      | <b><i>m/z</i> 829.22</b> |
| <b>Mass deviation:</b>    | <b><i>m/z</i> 0.02</b>   |
| <b>Retention time:</b>    | <b>43.7 min</b>          |

The diagram shows the electronic configuration for the S state. It features two yellow circles representing electrons, one labeled  $B_{2\alpha}$  and the other  $Y_{2\alpha}$ . A blue square represents an electron labeled  $\beta_6$ , which is connected by a diagonal line to another yellow circle labeled  $\beta_3$ . This  $\beta_3$  electron is further connected to a yellow square labeled  $Y_{1\beta}$ . A bracket on the left groups the  $B_{2\alpha}$  and  $Y_{2\alpha}$  electrons under the label  $S$ . A diagonal line connects the  $\beta_6$  electron to the label  $0,4A_3$ .

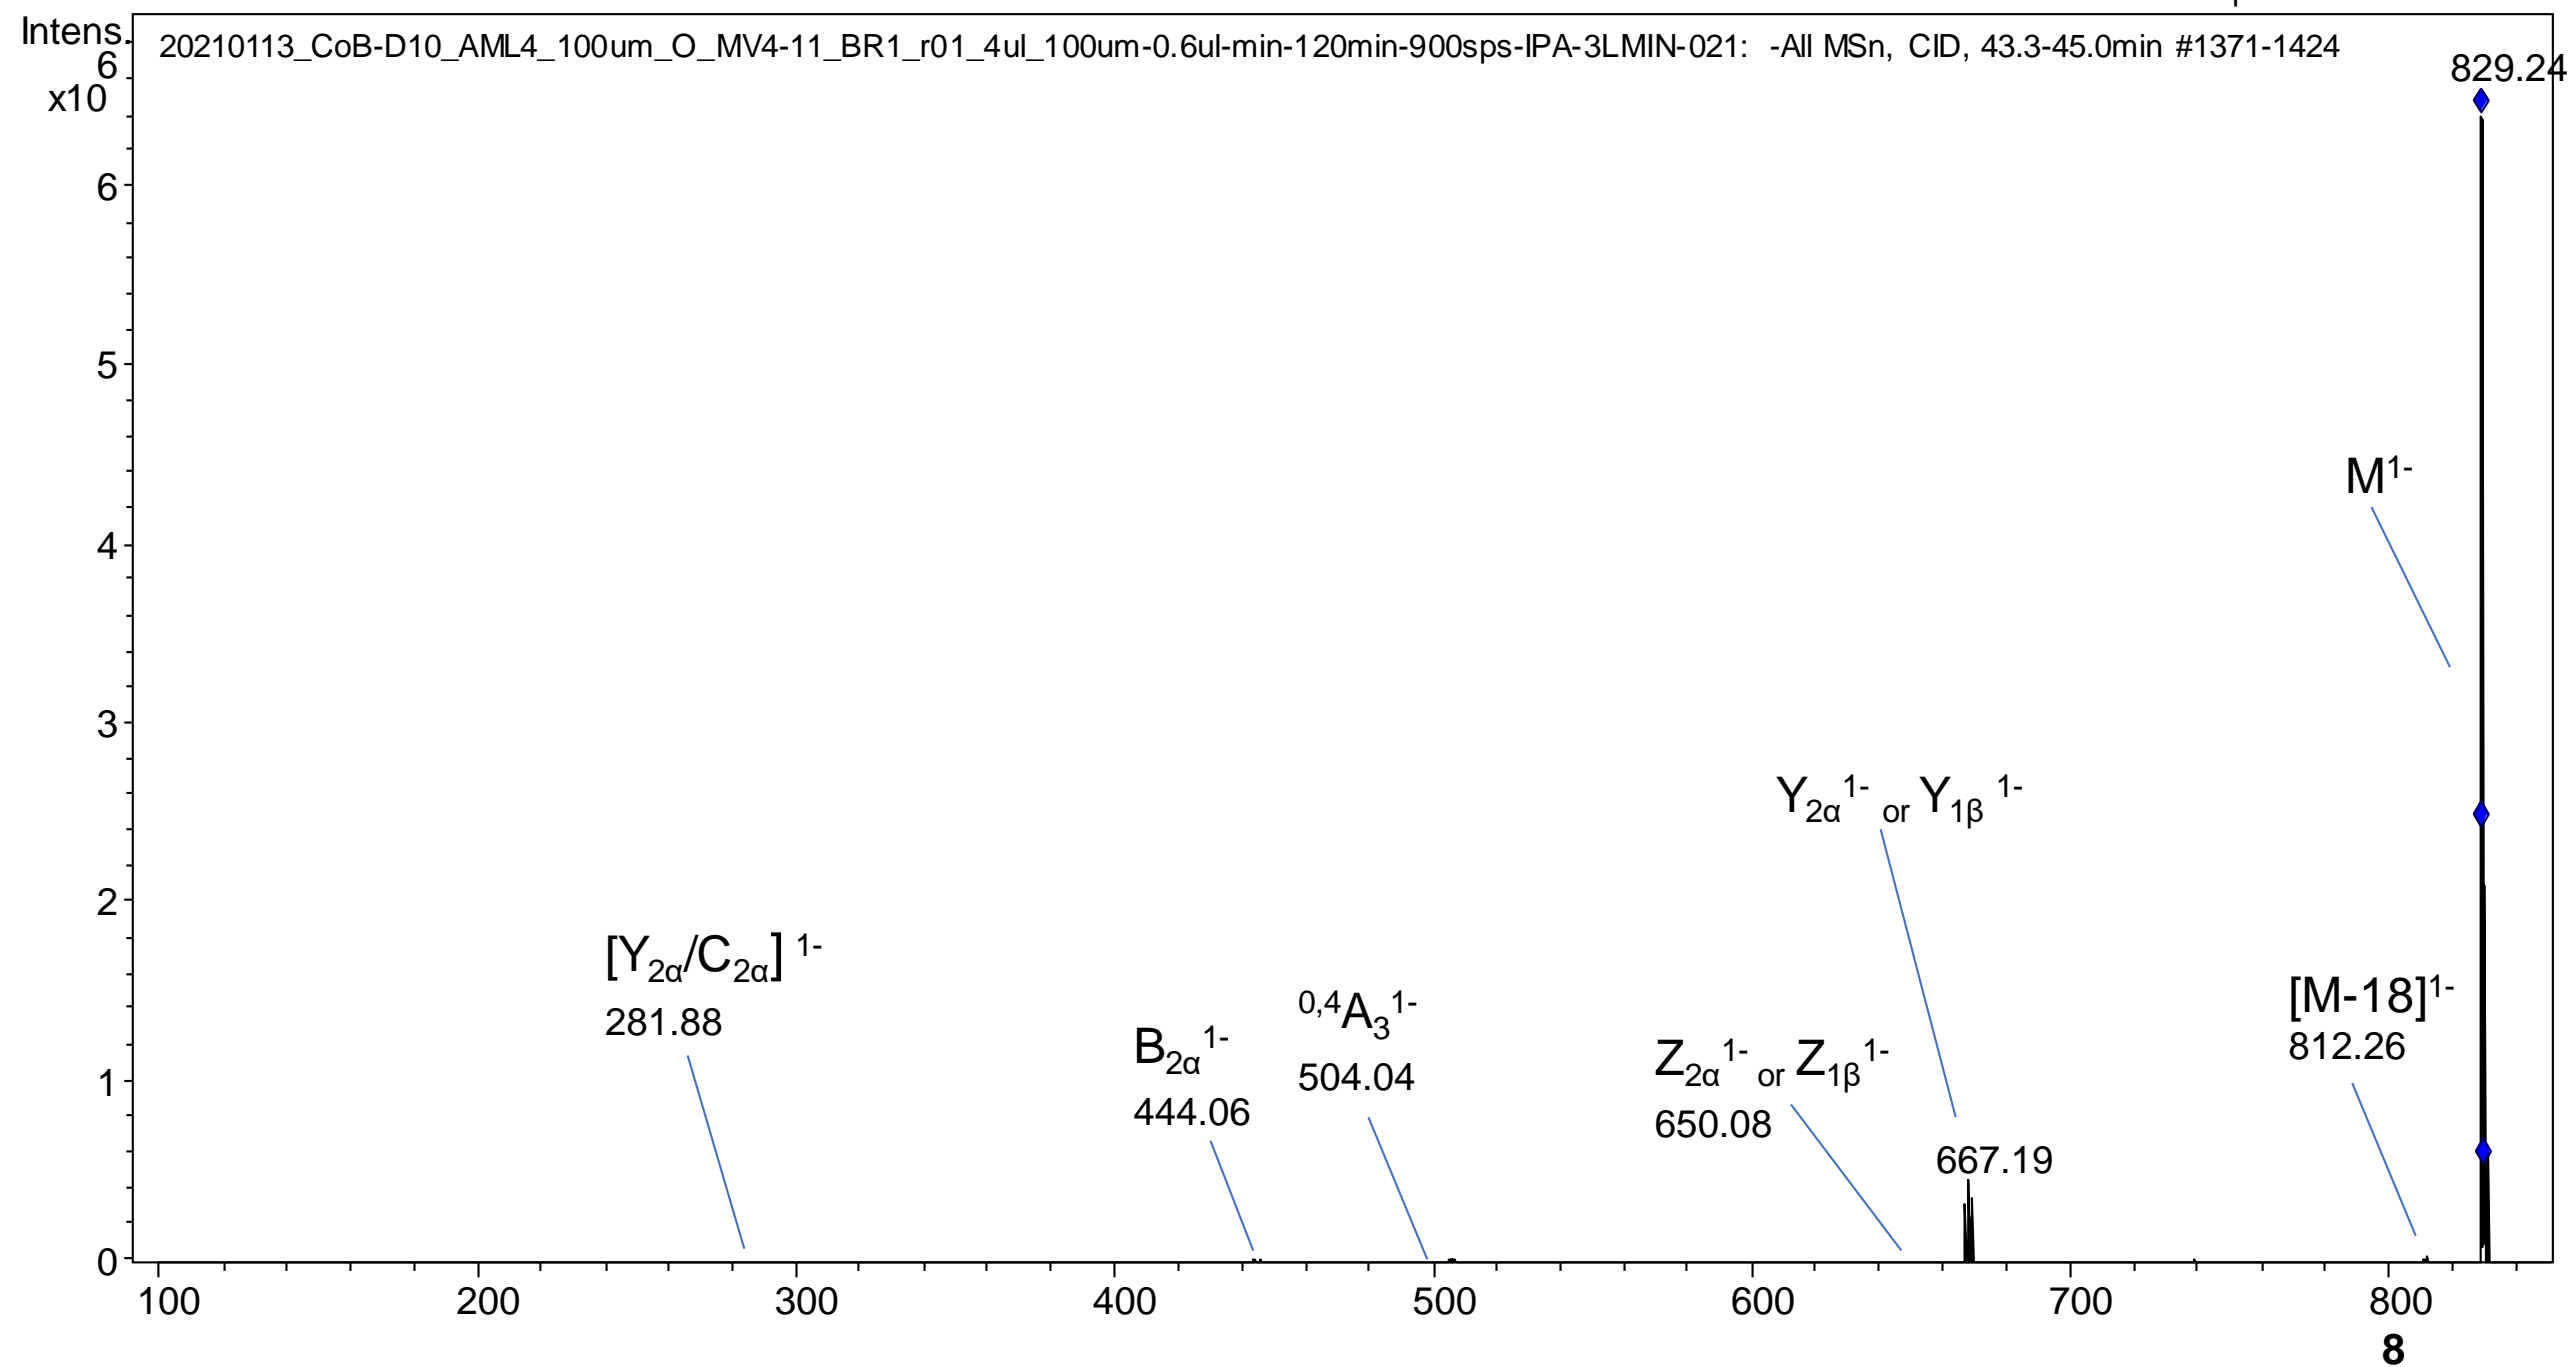



H1N2S1

Depicted MS<sup>2</sup> was obtained from analysis of cell line: TF-1

**Monoisotopic mass:** 879.34 Da  
**Charge observed:** 1-  
**Theoretical ion:** *m/z* 878.33  
**Observed ion:** *m/z* 878.27  
**Mass deviation:** *m/z* 0.05  
**Retention time:** 46.0 min  
**Note:** α-2,3 linkage of sialic acid confirmed  
 by neuraminidase S and A treatment

**UniCarb-DB: #191**

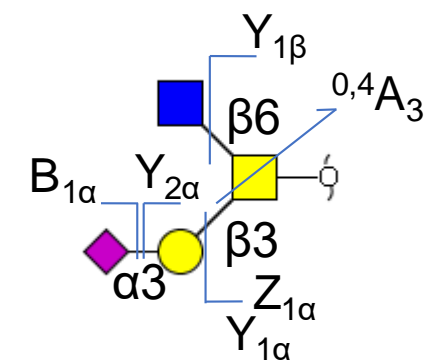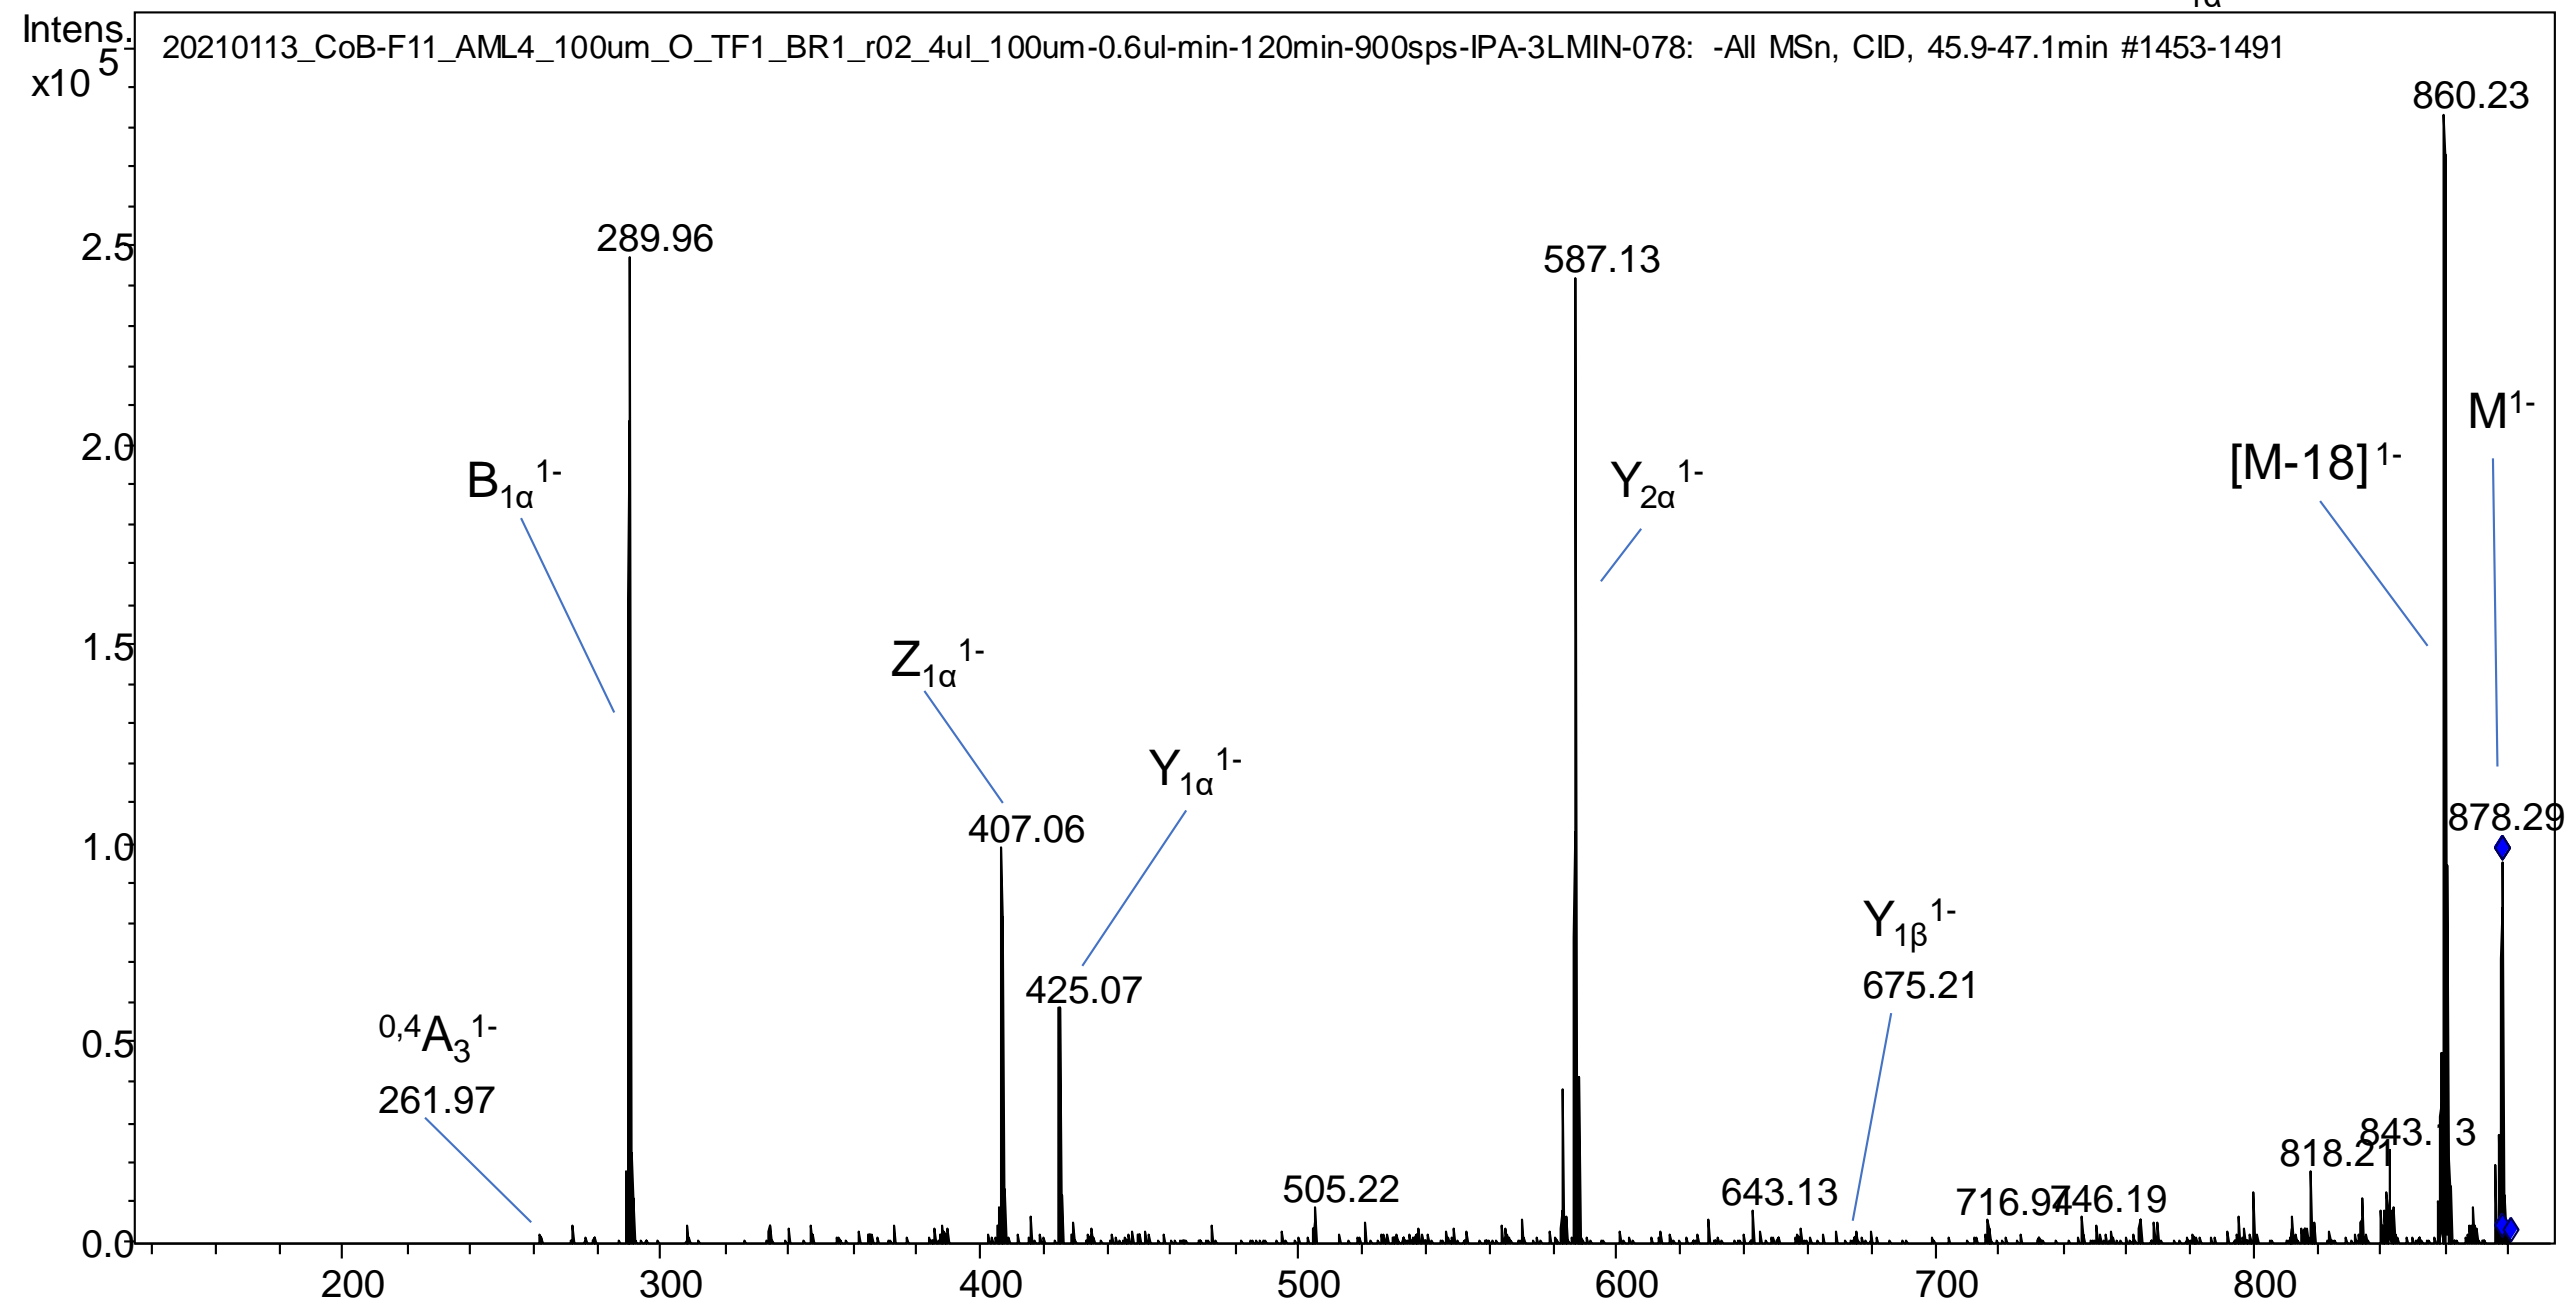

# Glycan 8

## H2N2F1

Depicted MS<sup>2</sup> was obtained from  
analysis of cell line: MV4-11

Monoisotopic mass: 896.35 Da  
Charge observed: 1-  
Theoretical ion: *m/z* 895.34  
Observed ion: *m/z* 895.28  
Mass deviation: *m/z* 0.06  
Retention time: 37.0 min  
Note: Characteristic *m/z* 348 ion for Lewis a

UniCarb-DB: #33

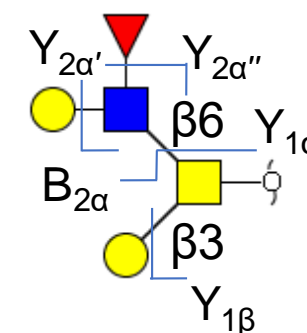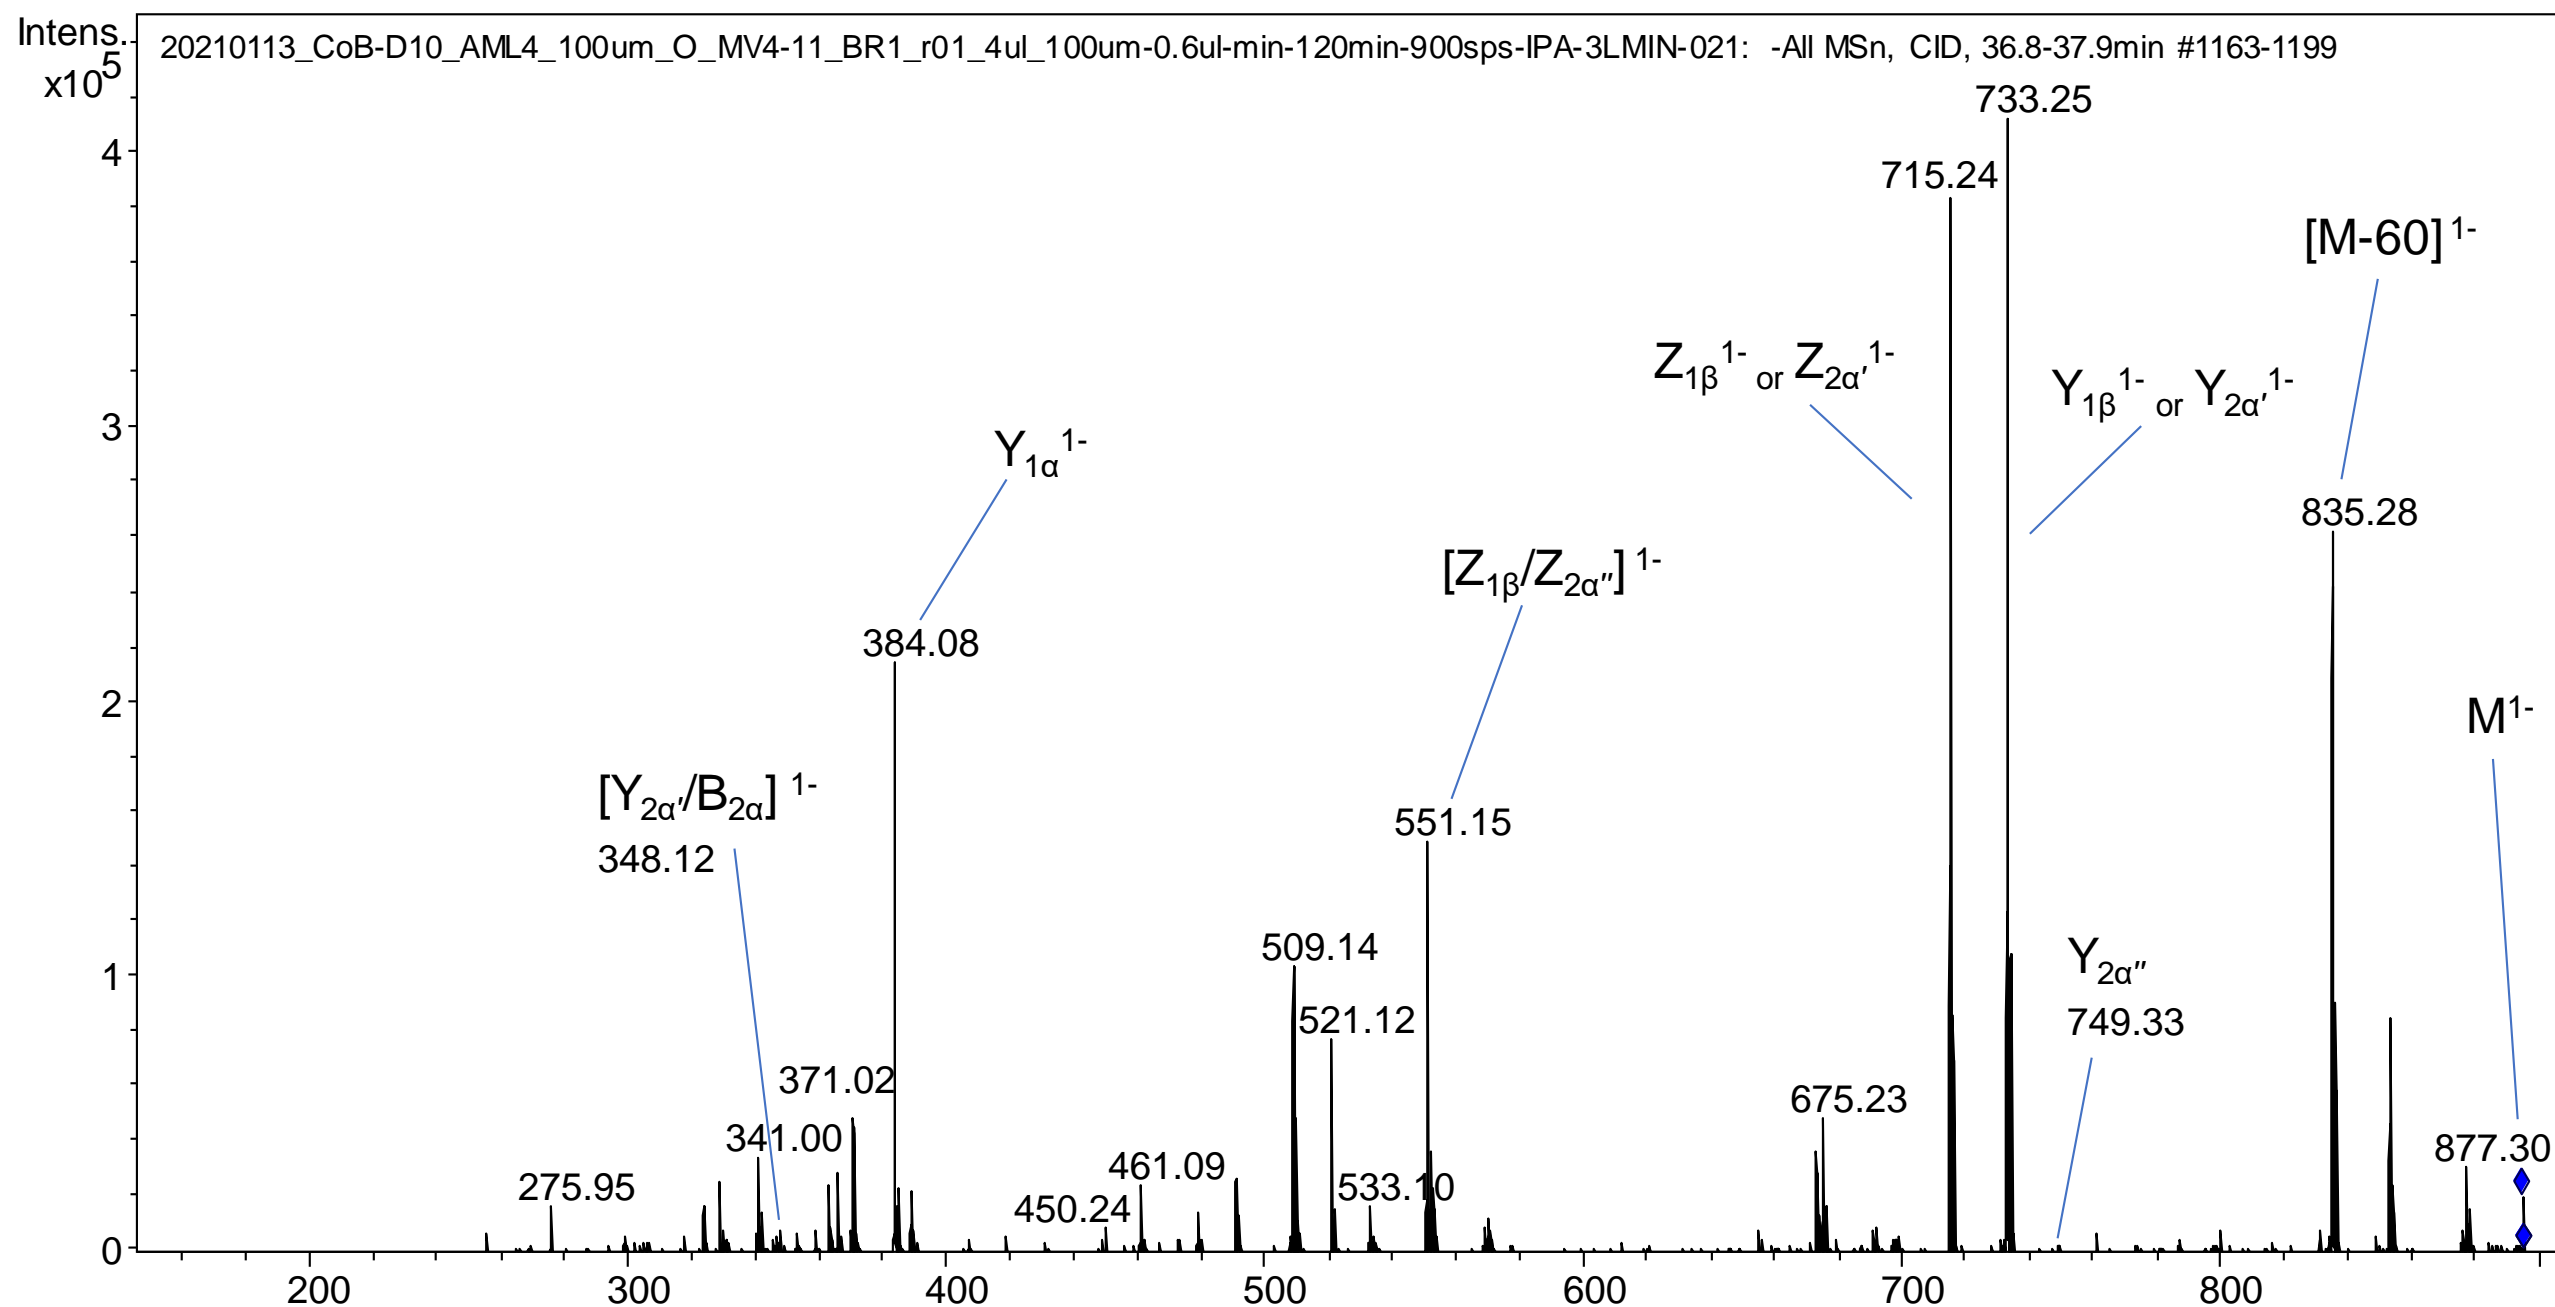

H1N1S2

**Depicted MS<sup>2</sup> was obtained from analysis of cell line: MV4-11**

**Monoisotopic mass:** 967.35 Da  
**Charge observed:** 1-  
**Theoretical ion:** *m/z* 966.34 *m/z*  
**Observed ion:** *m/z* 966.32 *m/z*  
**Mass deviation:** *m/z* 0.02 *m/z*  
**Retention time:** 38.1 min  
**Note:** Linkage of sialic acids confirmed by neuraminidase S and A treatment

**UniCarb-DB: #47**

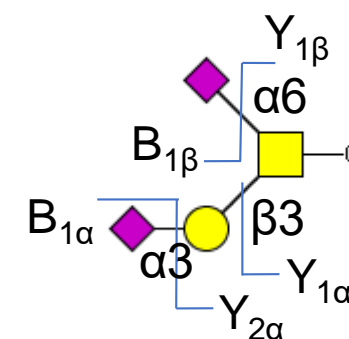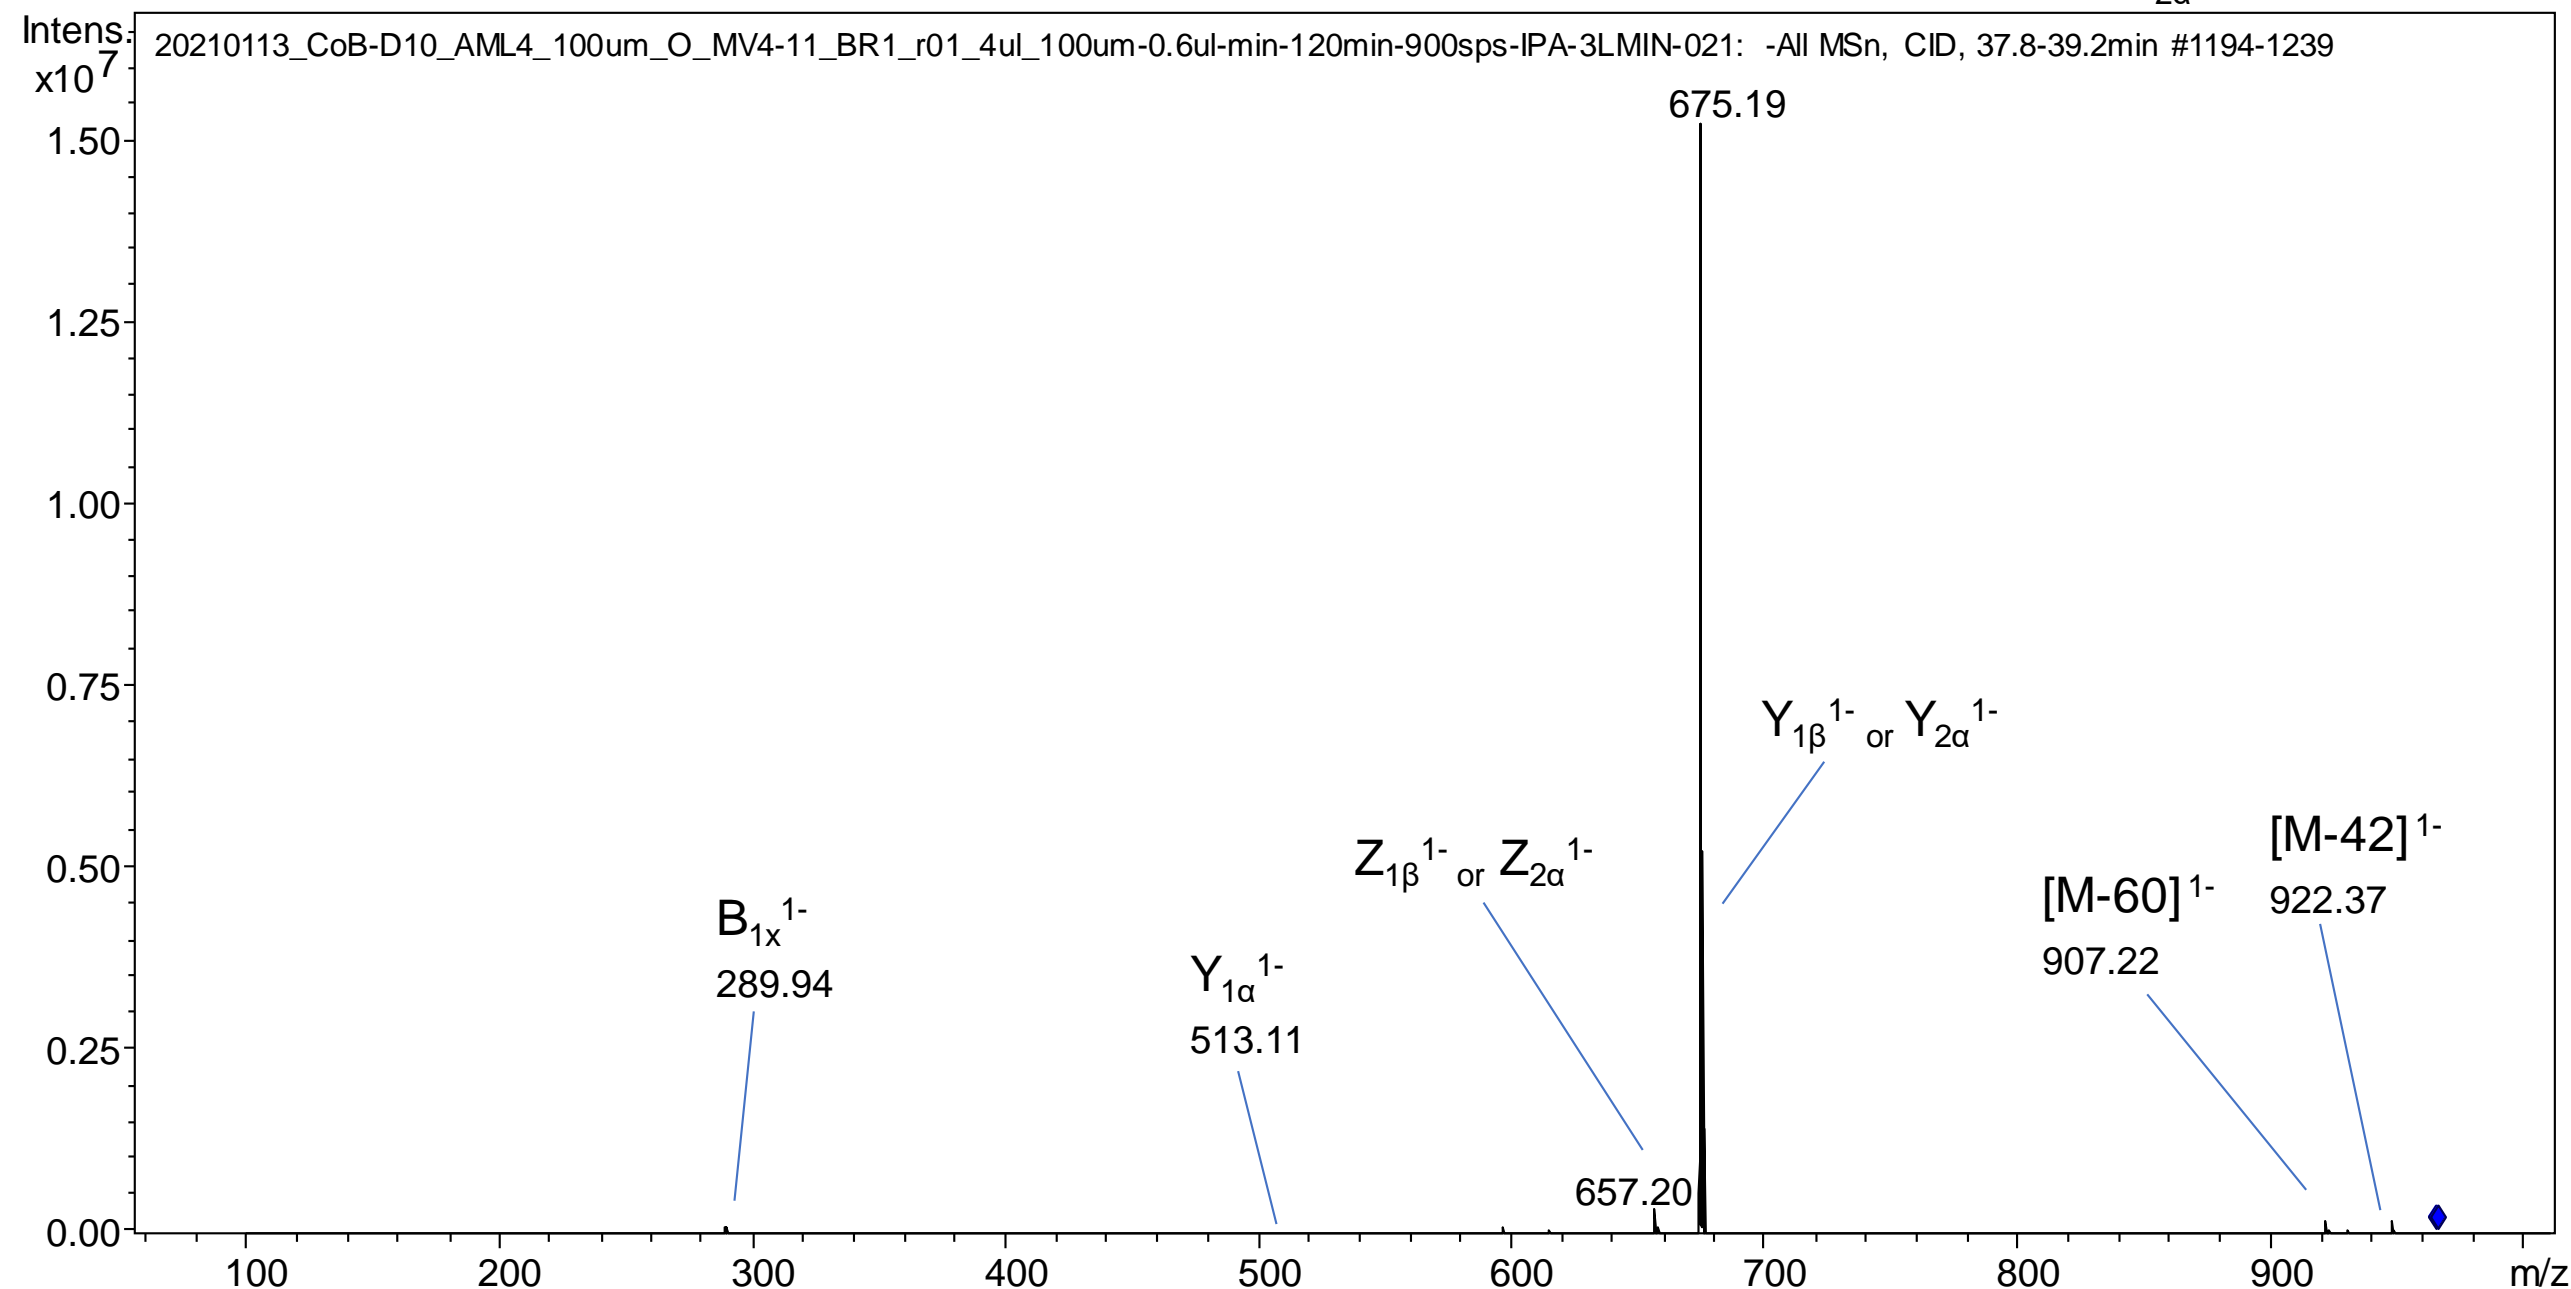

# Glycan 10a

## H2N2S1

Depicted MS<sup>2</sup> was obtained from  
analysis of cell line: TF-1

Monoisotopic mass: 1041.40 Da  
Charge observed: 1-  
Theoretical ion: *m/z* 1040.39  
Observed ion: *m/z* 1040.35  
Mass deviation: *m/z* 0.04  
Retention time: 53.5 min  
Note:  $\alpha$ -2,3 linkage of sialic acid confirmed  
by neuraminidase S and A treatment

UniCarb-DB: #48

Elution order of isomers  
in line with Jin,  
Chunsheng, et al. *Mol. &  
Cell. Proteomics* 16.5  
(2017): 743-758.

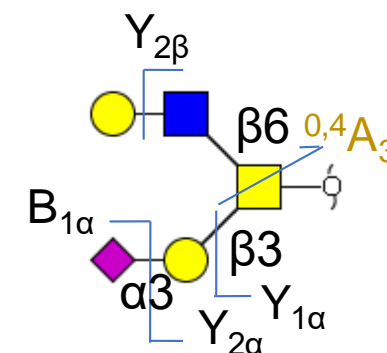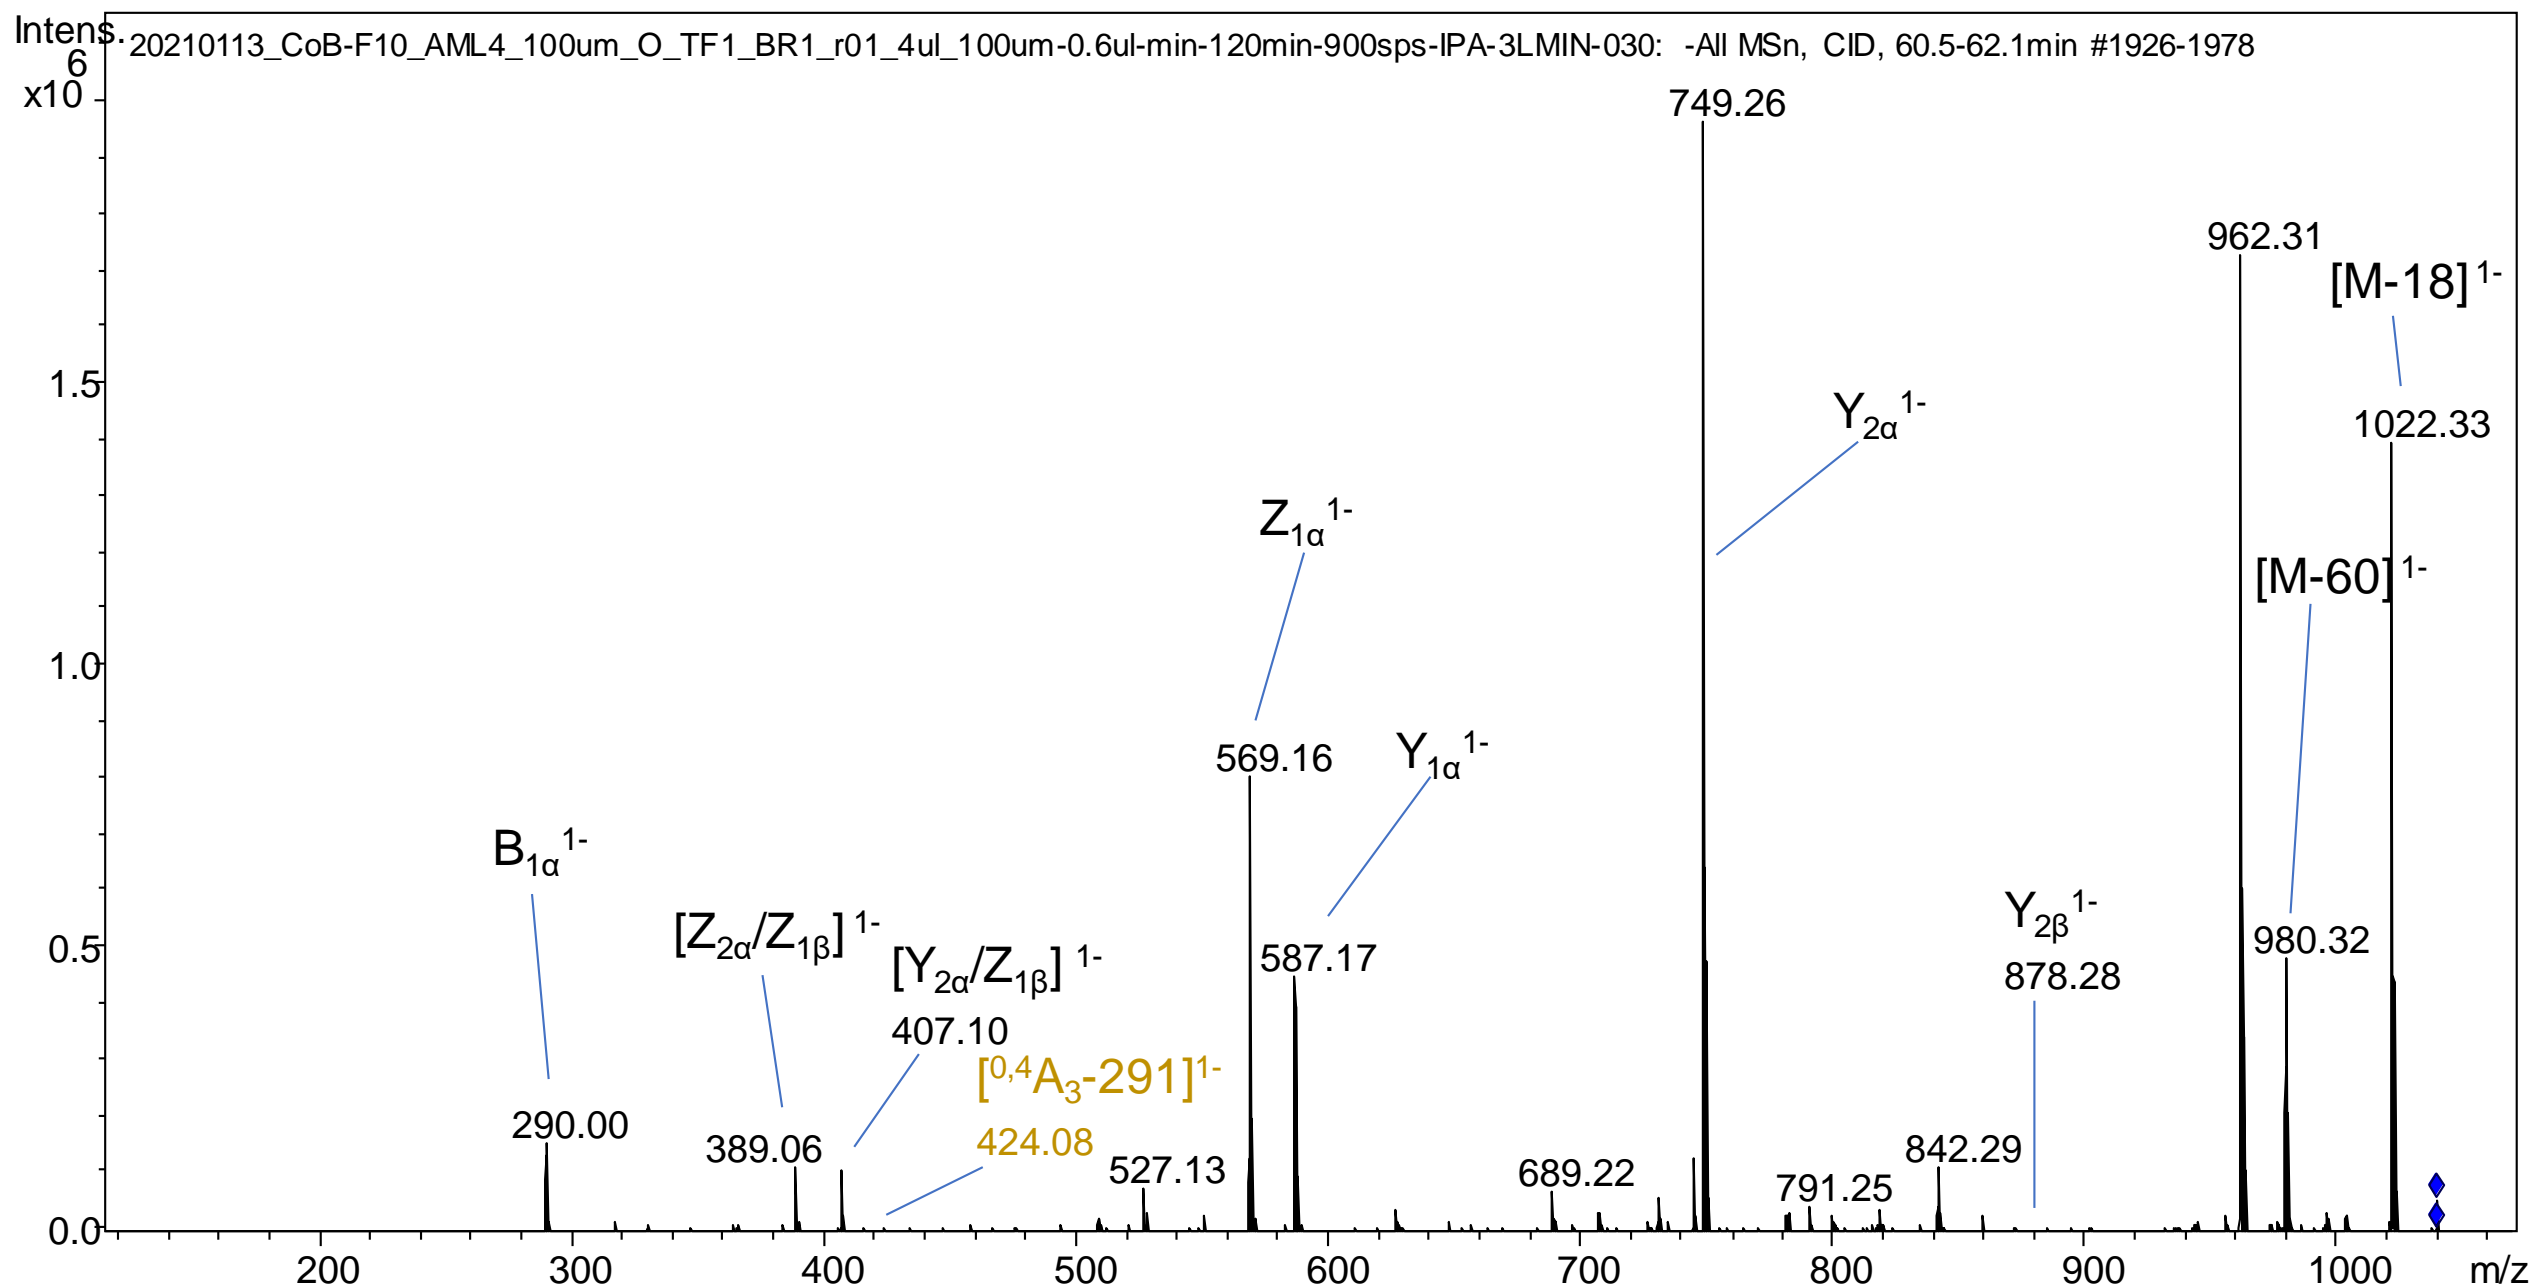

# Glycan 10b

## H2N2S1

Depicted MS<sup>2</sup> was obtained from  
analysis of cell line: HL-60

Monoisotopic mass: 1041.40 Da  
Charge observed: 1-  
Theoretical ion: *m/z* 1040.39  
Observed ion: *m/z* 1040.33  
Mass deviation: *m/z* 0.06  
Retention time: 61.3 min  
Note:  $\alpha$ -2,3 linkage of sialic acid confirmed  
by neuraminidase S and A treatment

UniCarb-DB: #2643

Elution order of isomers  
in line with Jin,  
Chunsheng, et al. *Mol. &  
Cell. Proteomics* 16.5  
(2017): 743-758.

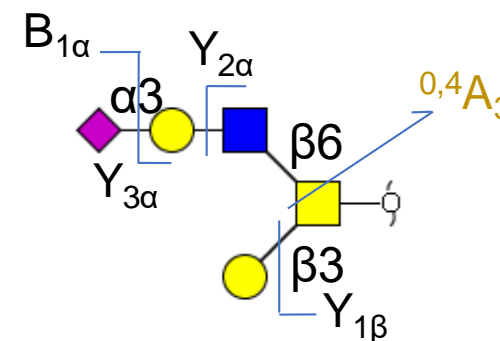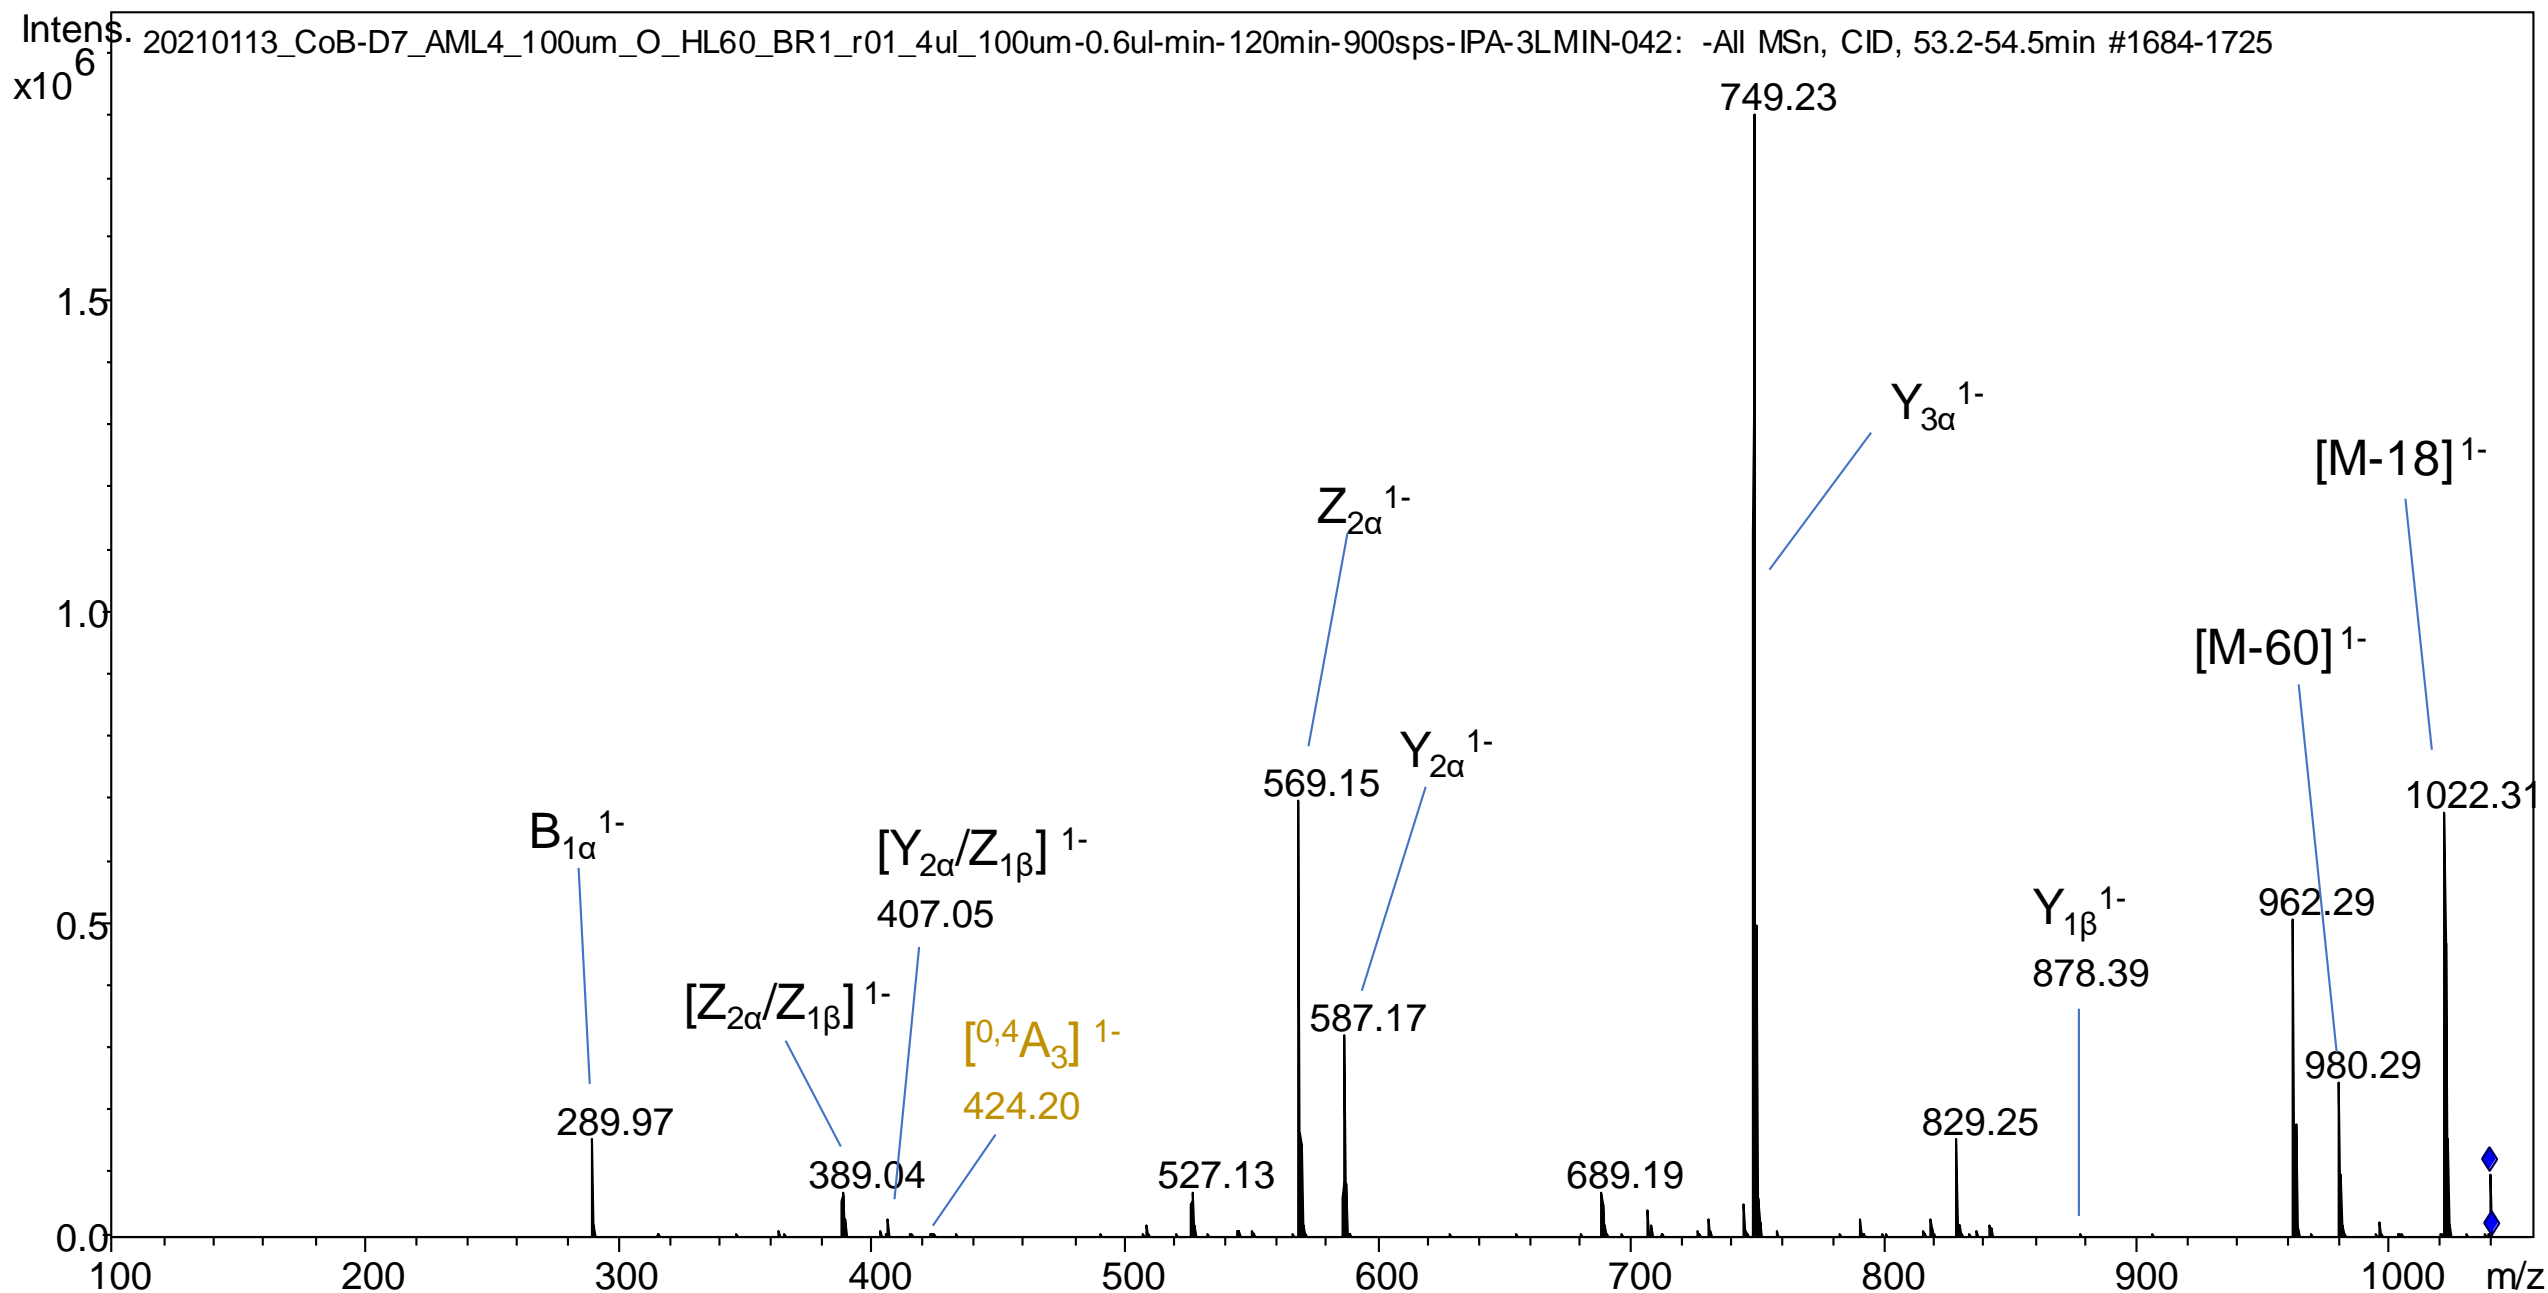

# Glycan 11

## H3N3

Depicted MS<sup>2</sup> was obtained from  
analysis of cell line: MV4-11

Monoisotopic mass: 1115.43 Da  
Charge observed: 1-  
Theoretical ion: *m/z* 1114.42  
Observed ion: *m/z* 1114.38  
Mass deviation: *m/z* 0.04  
Retention time: 65.8 min

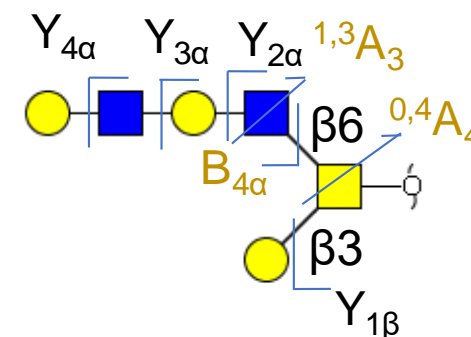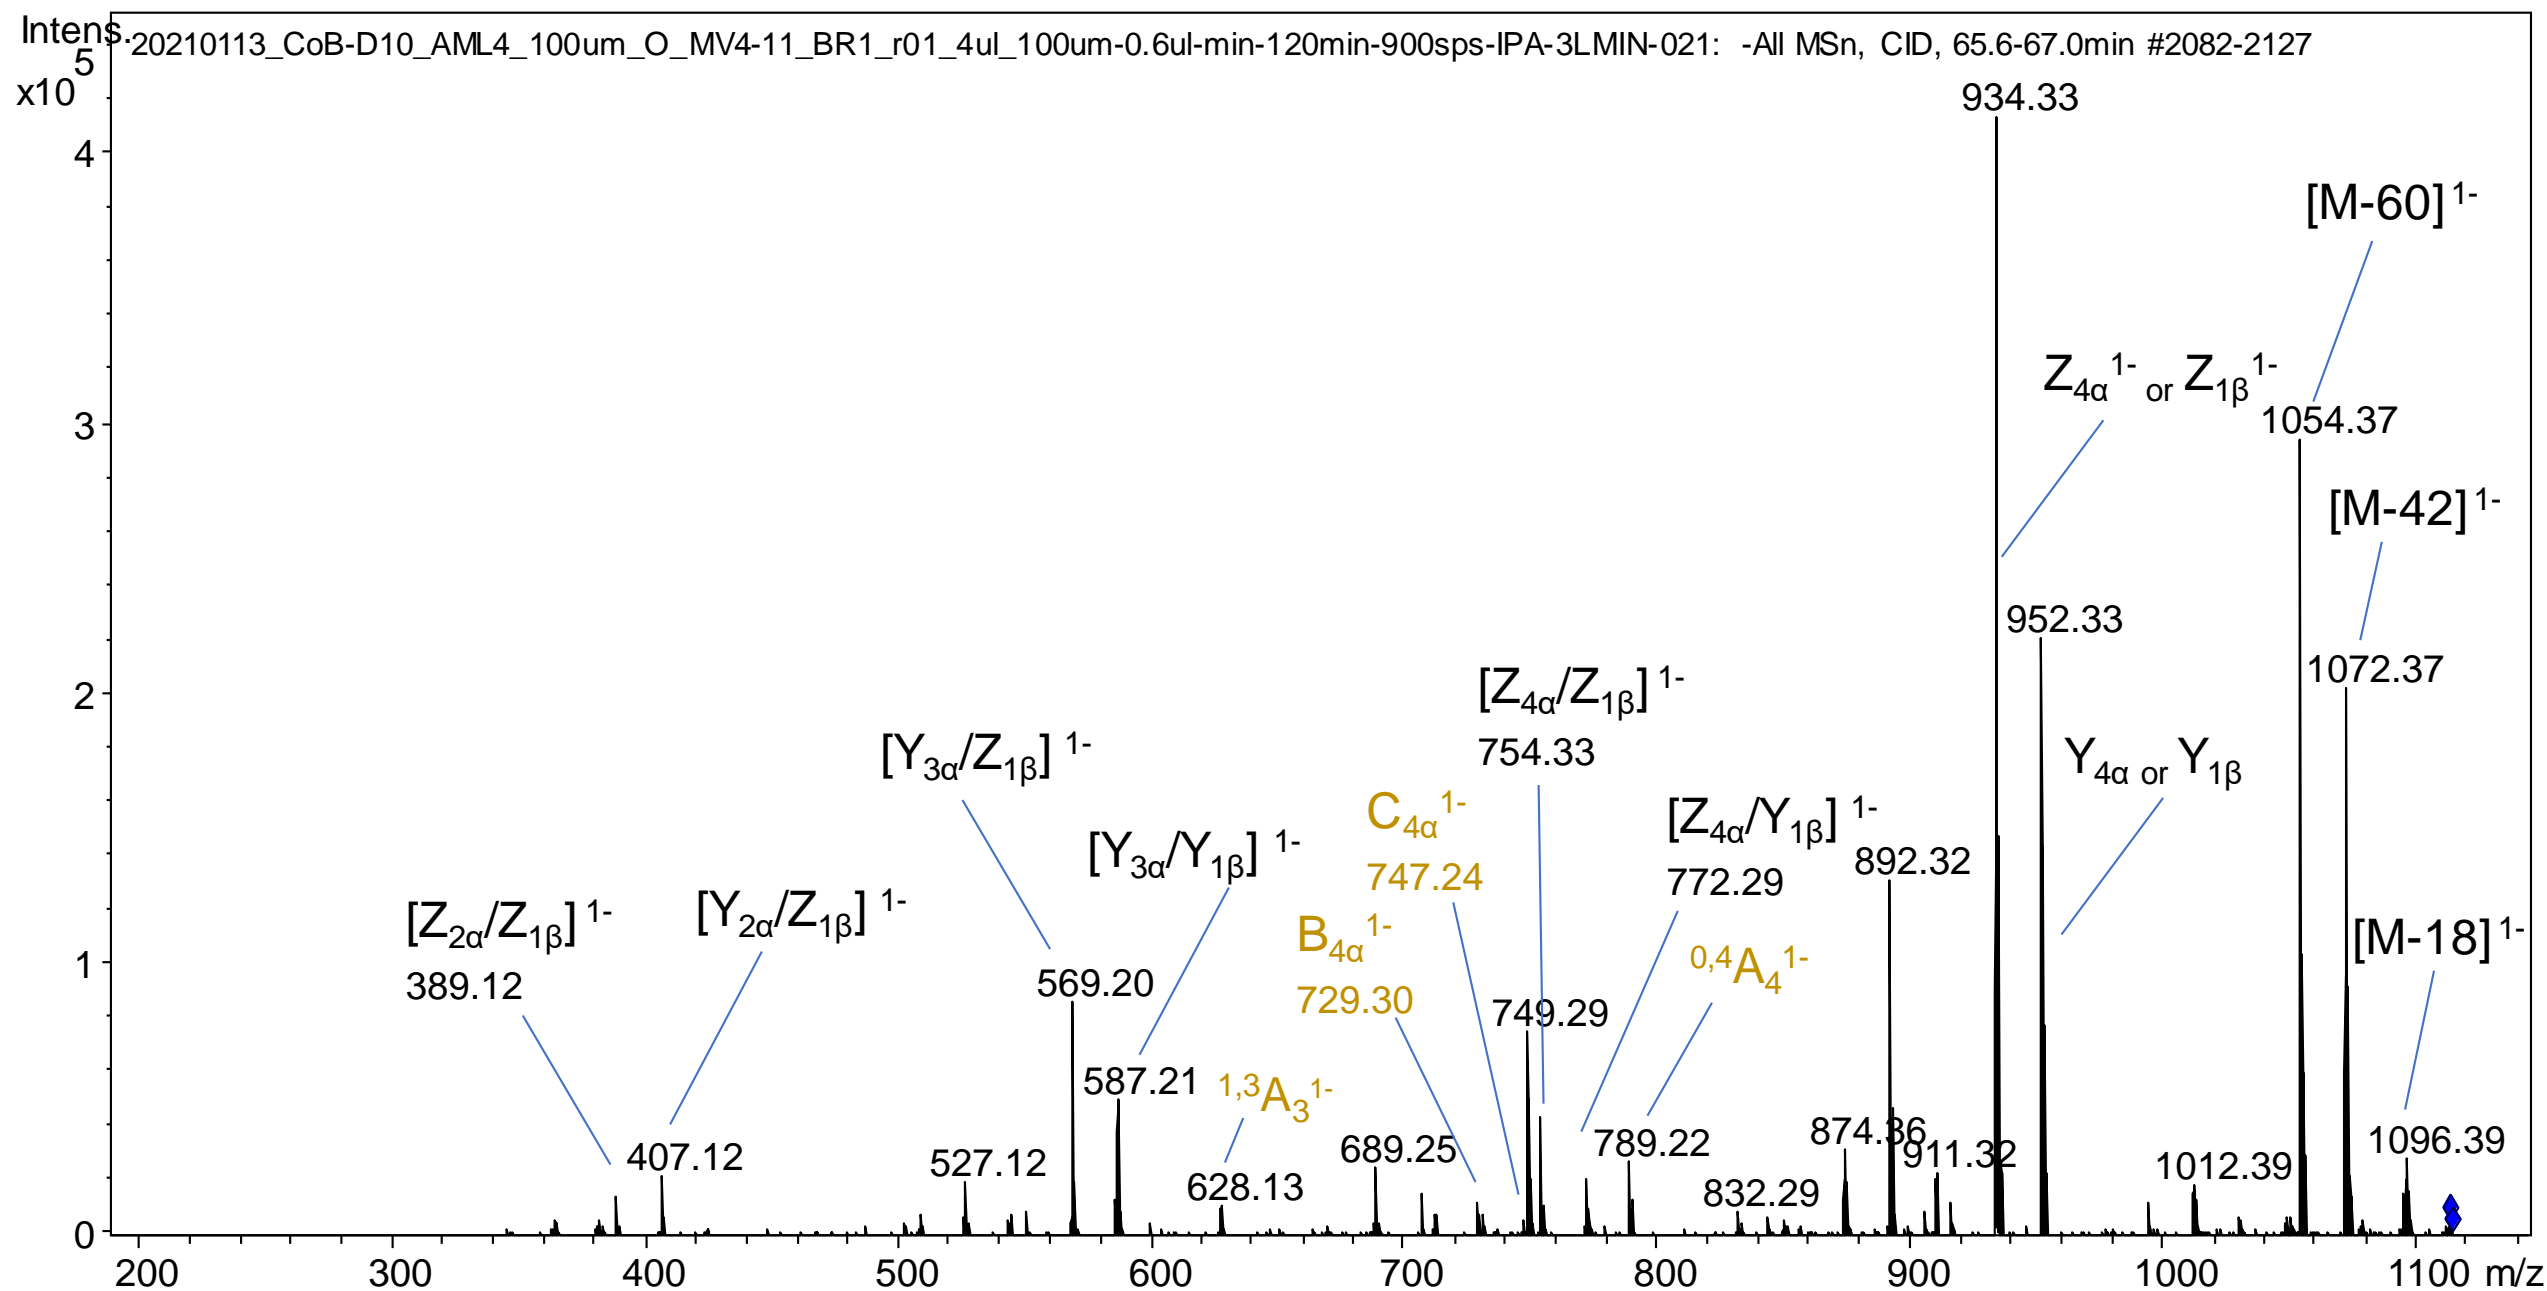

H2N2F1S1

Depicted MS<sup>2</sup> was obtained from analysis of cell line: HL-60

|                           |                           |
|---------------------------|---------------------------|
| <b>Monoisotopic mass:</b> | <b>1187.45 Da</b>         |
| <b>Charge observed:</b>   | <b>1-</b>                 |
| <b>Theoretical ion:</b>   | <b><i>m/z</i> 1186.44</b> |
| <b>Observed ion:</b>      | <b><i>m/z</i> 1186.37</b> |
| <b>Mass deviation:</b>    | <b><i>m/z</i> 0.07</b>    |
| <b>Retention time:</b>    | <b>47.7 min</b>           |

**Note:  $\alpha$ -2,3 linkage of sialic acids confirmed by neuraminidase S and A treatment;  $m/z$  364 fragment indicates Lewis x**

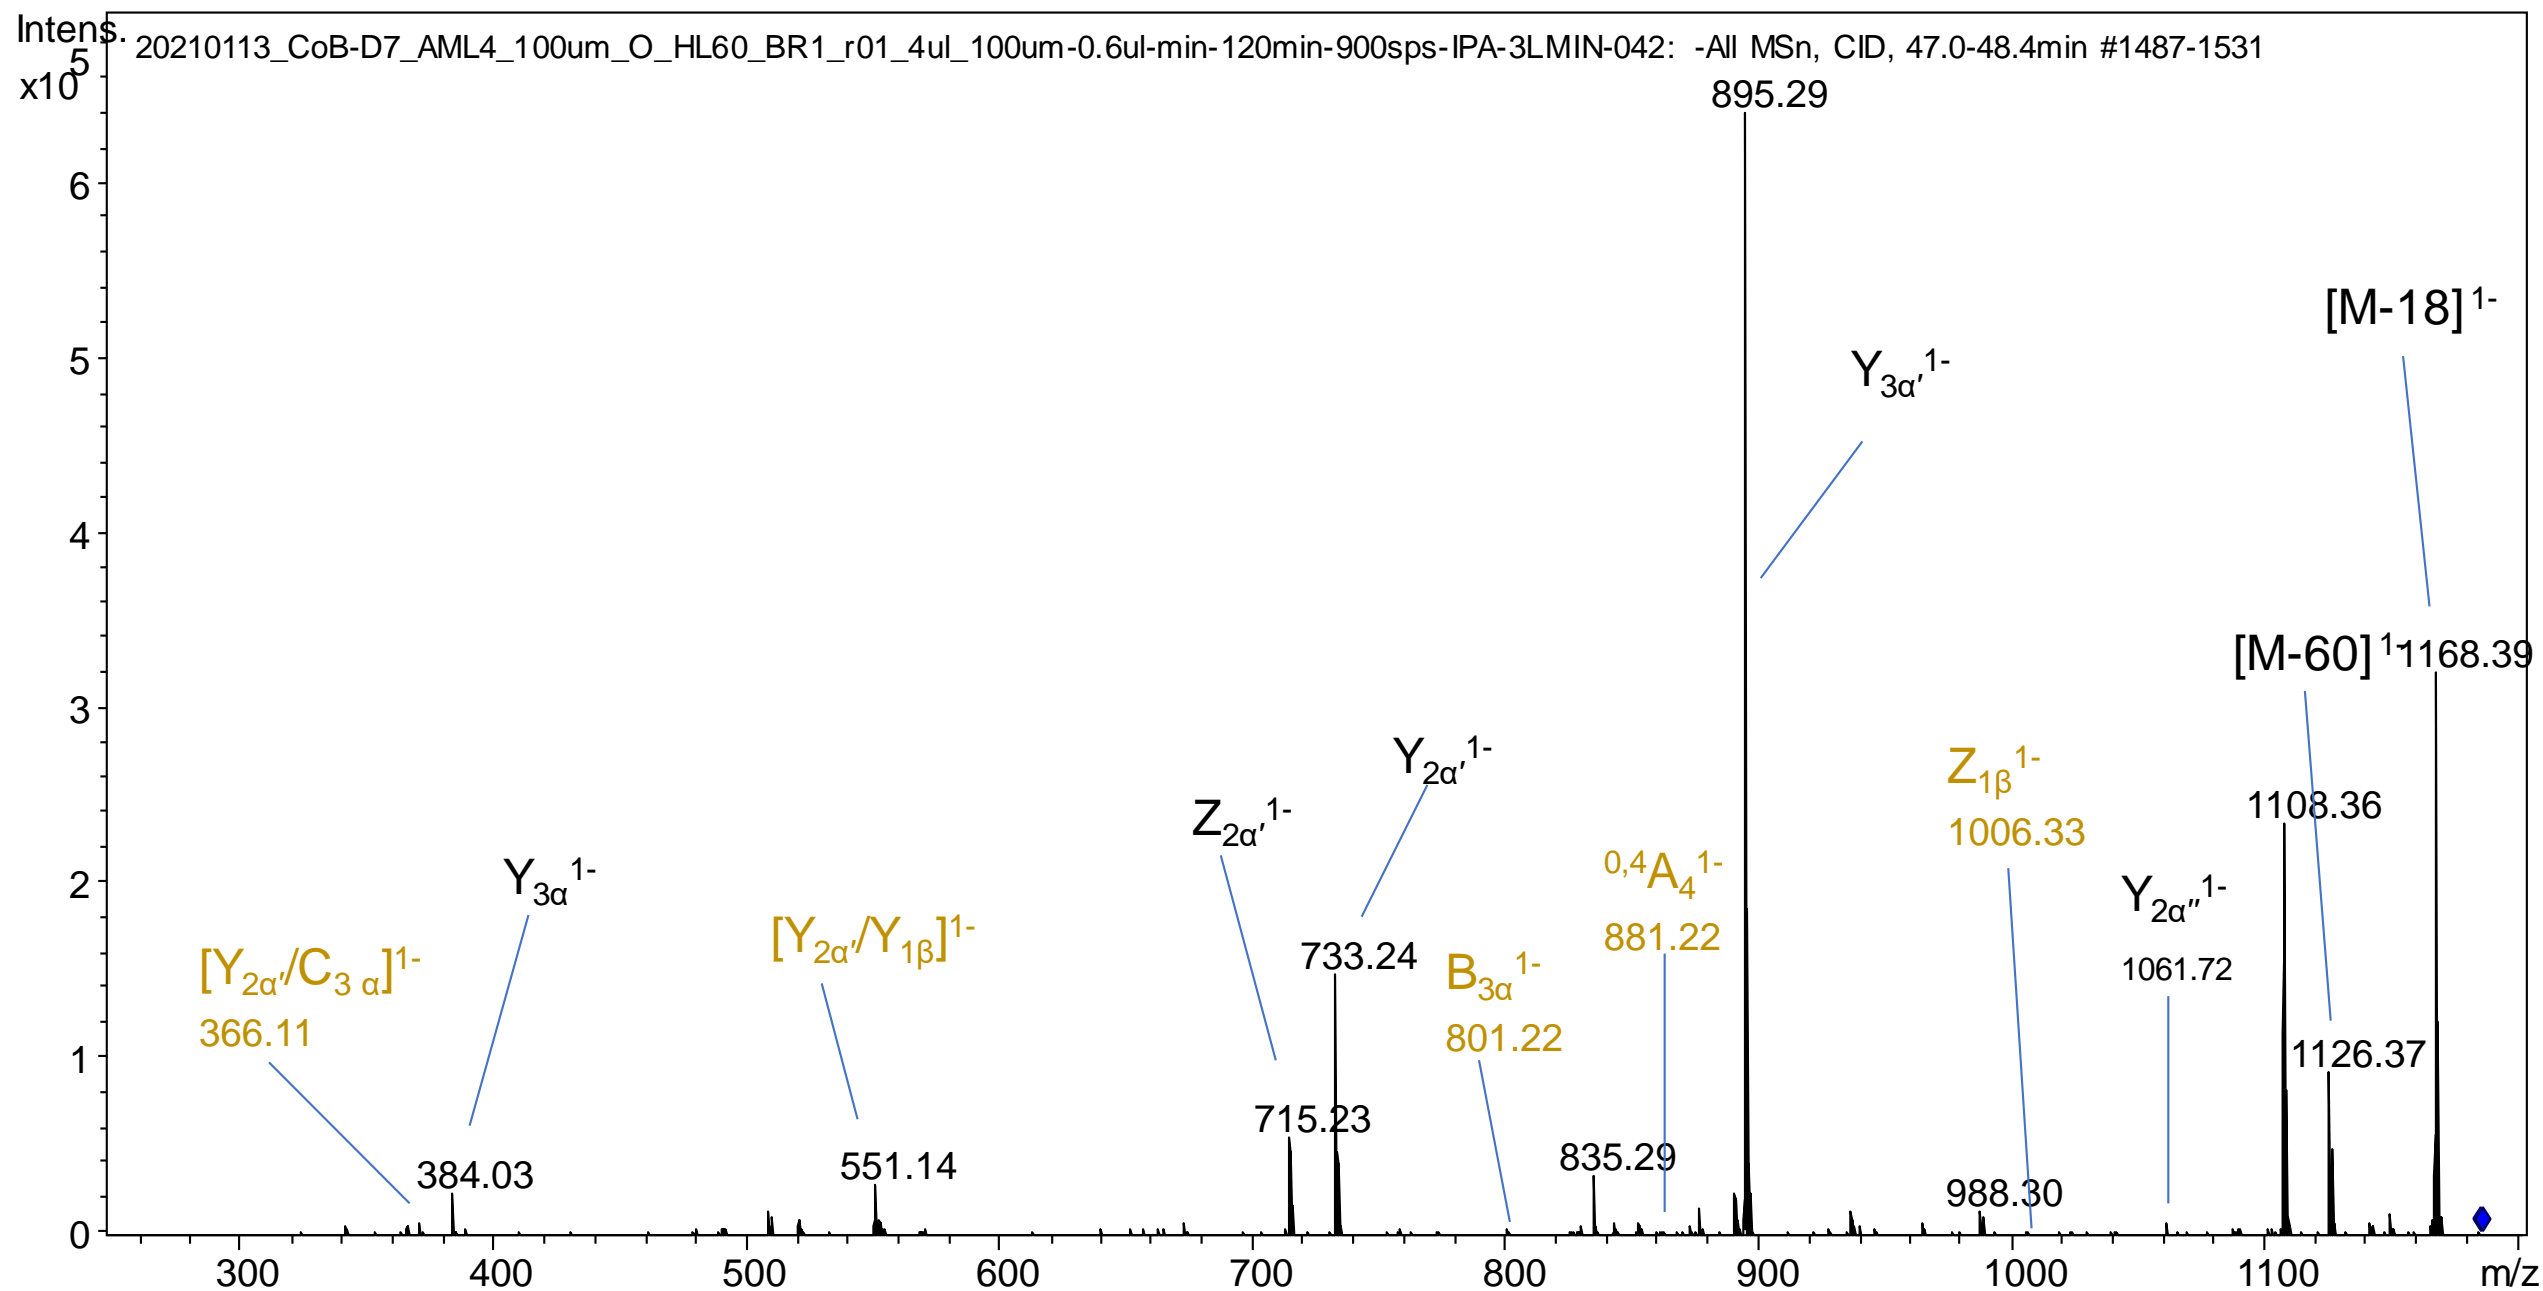

# Glycan 12b

H2N2F1S1

Depicted MS<sup>2</sup> was obtained from  
analysis of cell line: TF-1

Monoisotopic mass: 1187.45 Da  
Charge observed: 1-  
Theoretical ion: *m/z* 1186.44  
Observed ion: *m/z* 1186.40  
Mass deviation: *m/z* 0.04  
Retention time: 62.5 min

Note:  $\alpha$ -2,3 linkage of sialic acids confirmed by neuraminidase S and A  
treatment; *m/z* 325 and *m/z* 409 fragment indicate a H-epitope

UniCarb-DB: #165

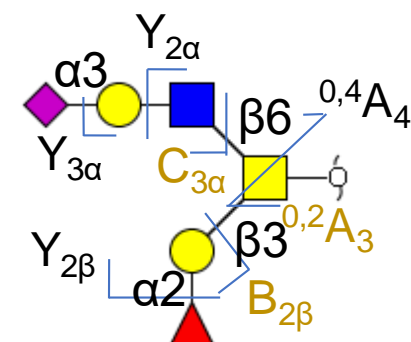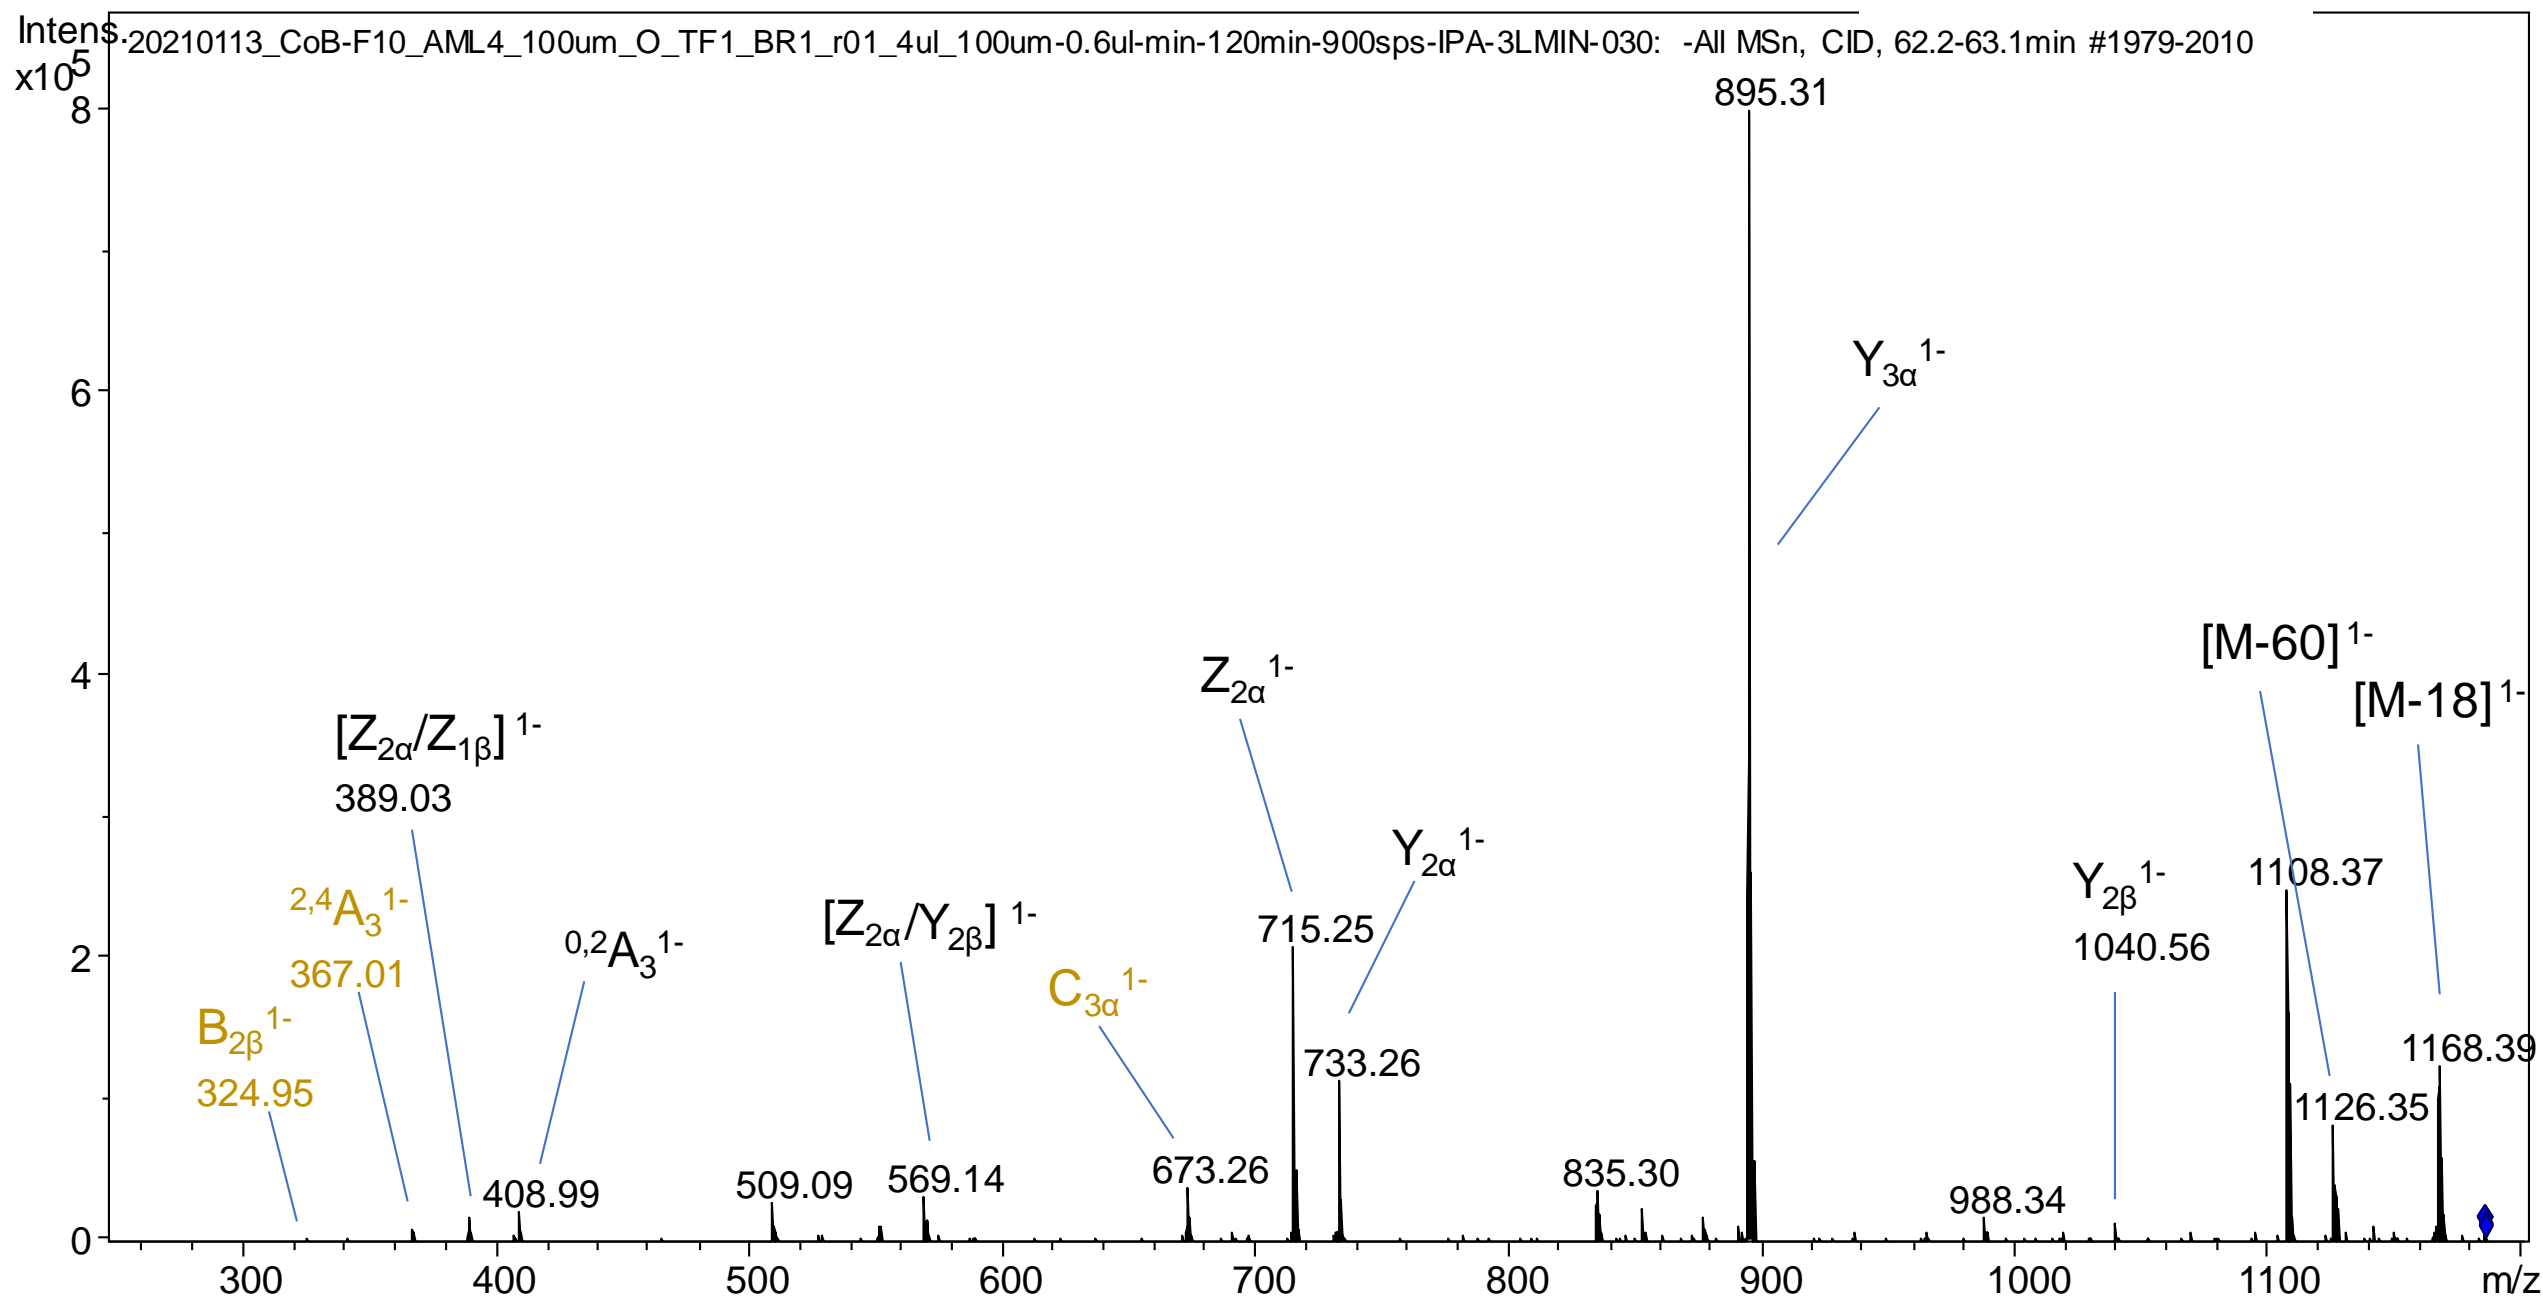



# Glycan 13

## H1N1S3

Depicted MS<sup>2</sup> was obtained from  
analysis of cell line: TF-1

Monoisotopic mass: 1258.45 Da  
Charge observed: 1-  
Theoretical ion: *m/z* 1257.44  
Observed ion: *m/z* 1257.40  
Mass deviation: *m/z* 0.04  
Retention time: 39.9 min  
Note: *m/z* 581 indicates two sialic acids linked to each other

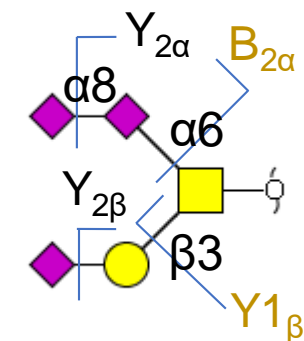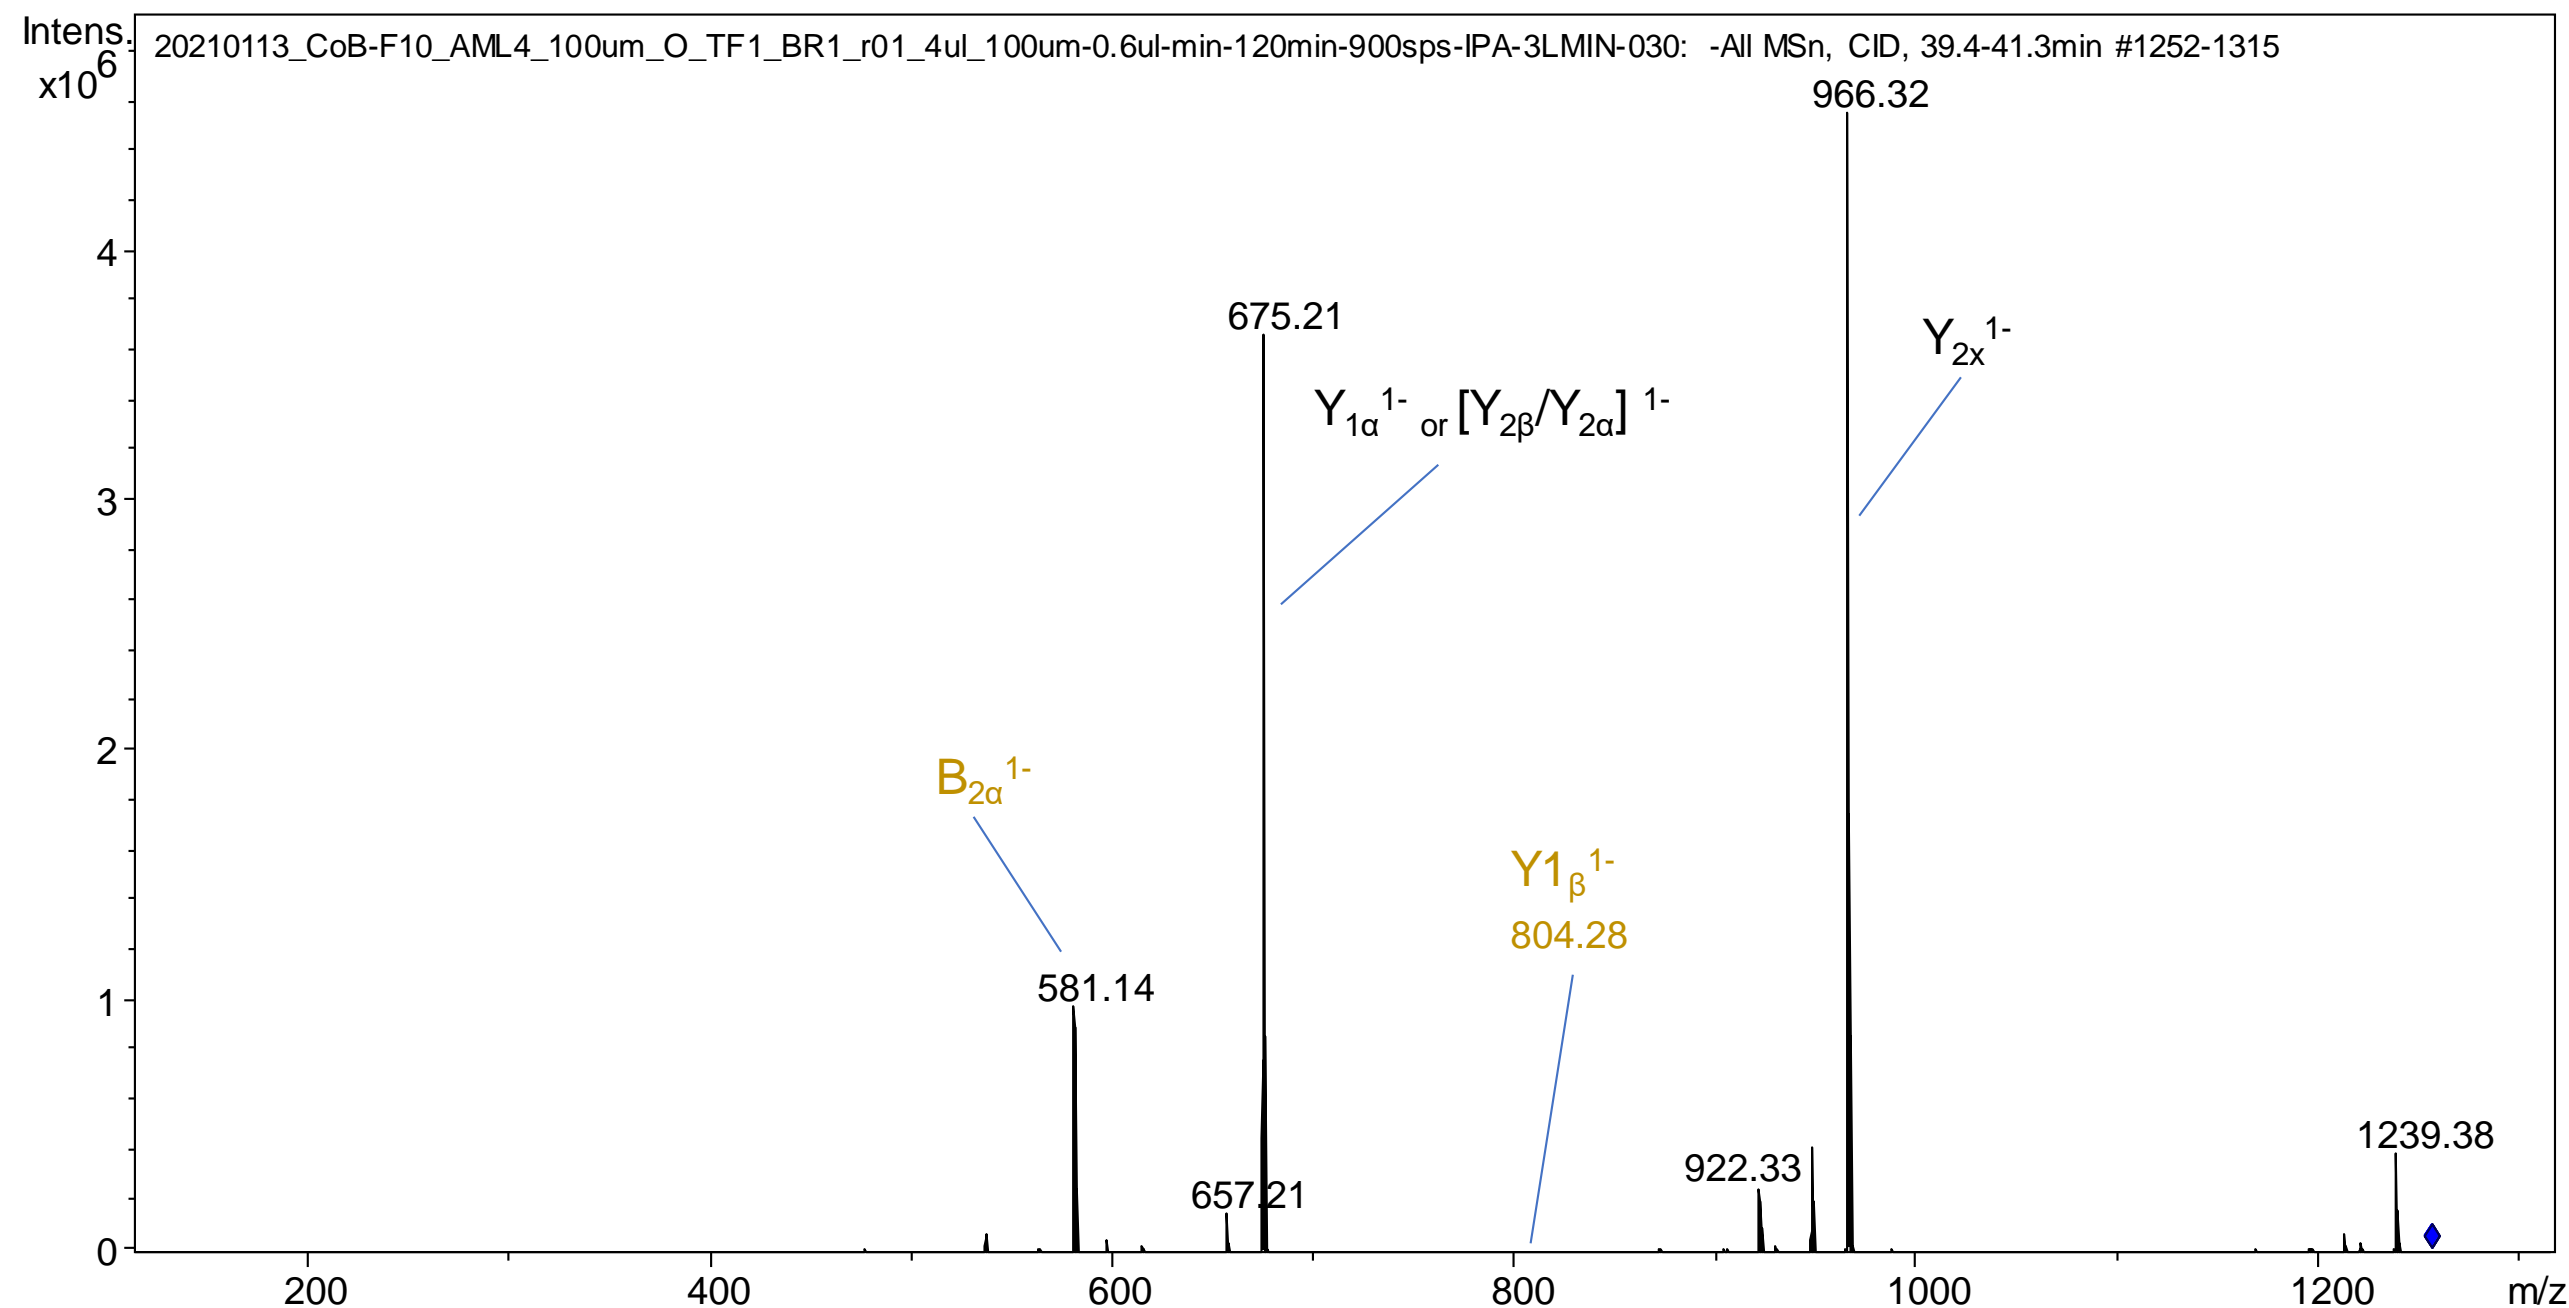

# H1N1S3

**Monoisotopic mass:** 1258.45 Da  
**Charge observed:** 2-  
**Theoretical ion:**  $m/z$  628.22  
**Observed ion:**  $m/z$  628.15  
**Mass deviation:**  $m/z$  0.05  
**Retention time:** 39.9 min  
**Note:**  $m/z$  581 indicates two sialic acids linked to each other

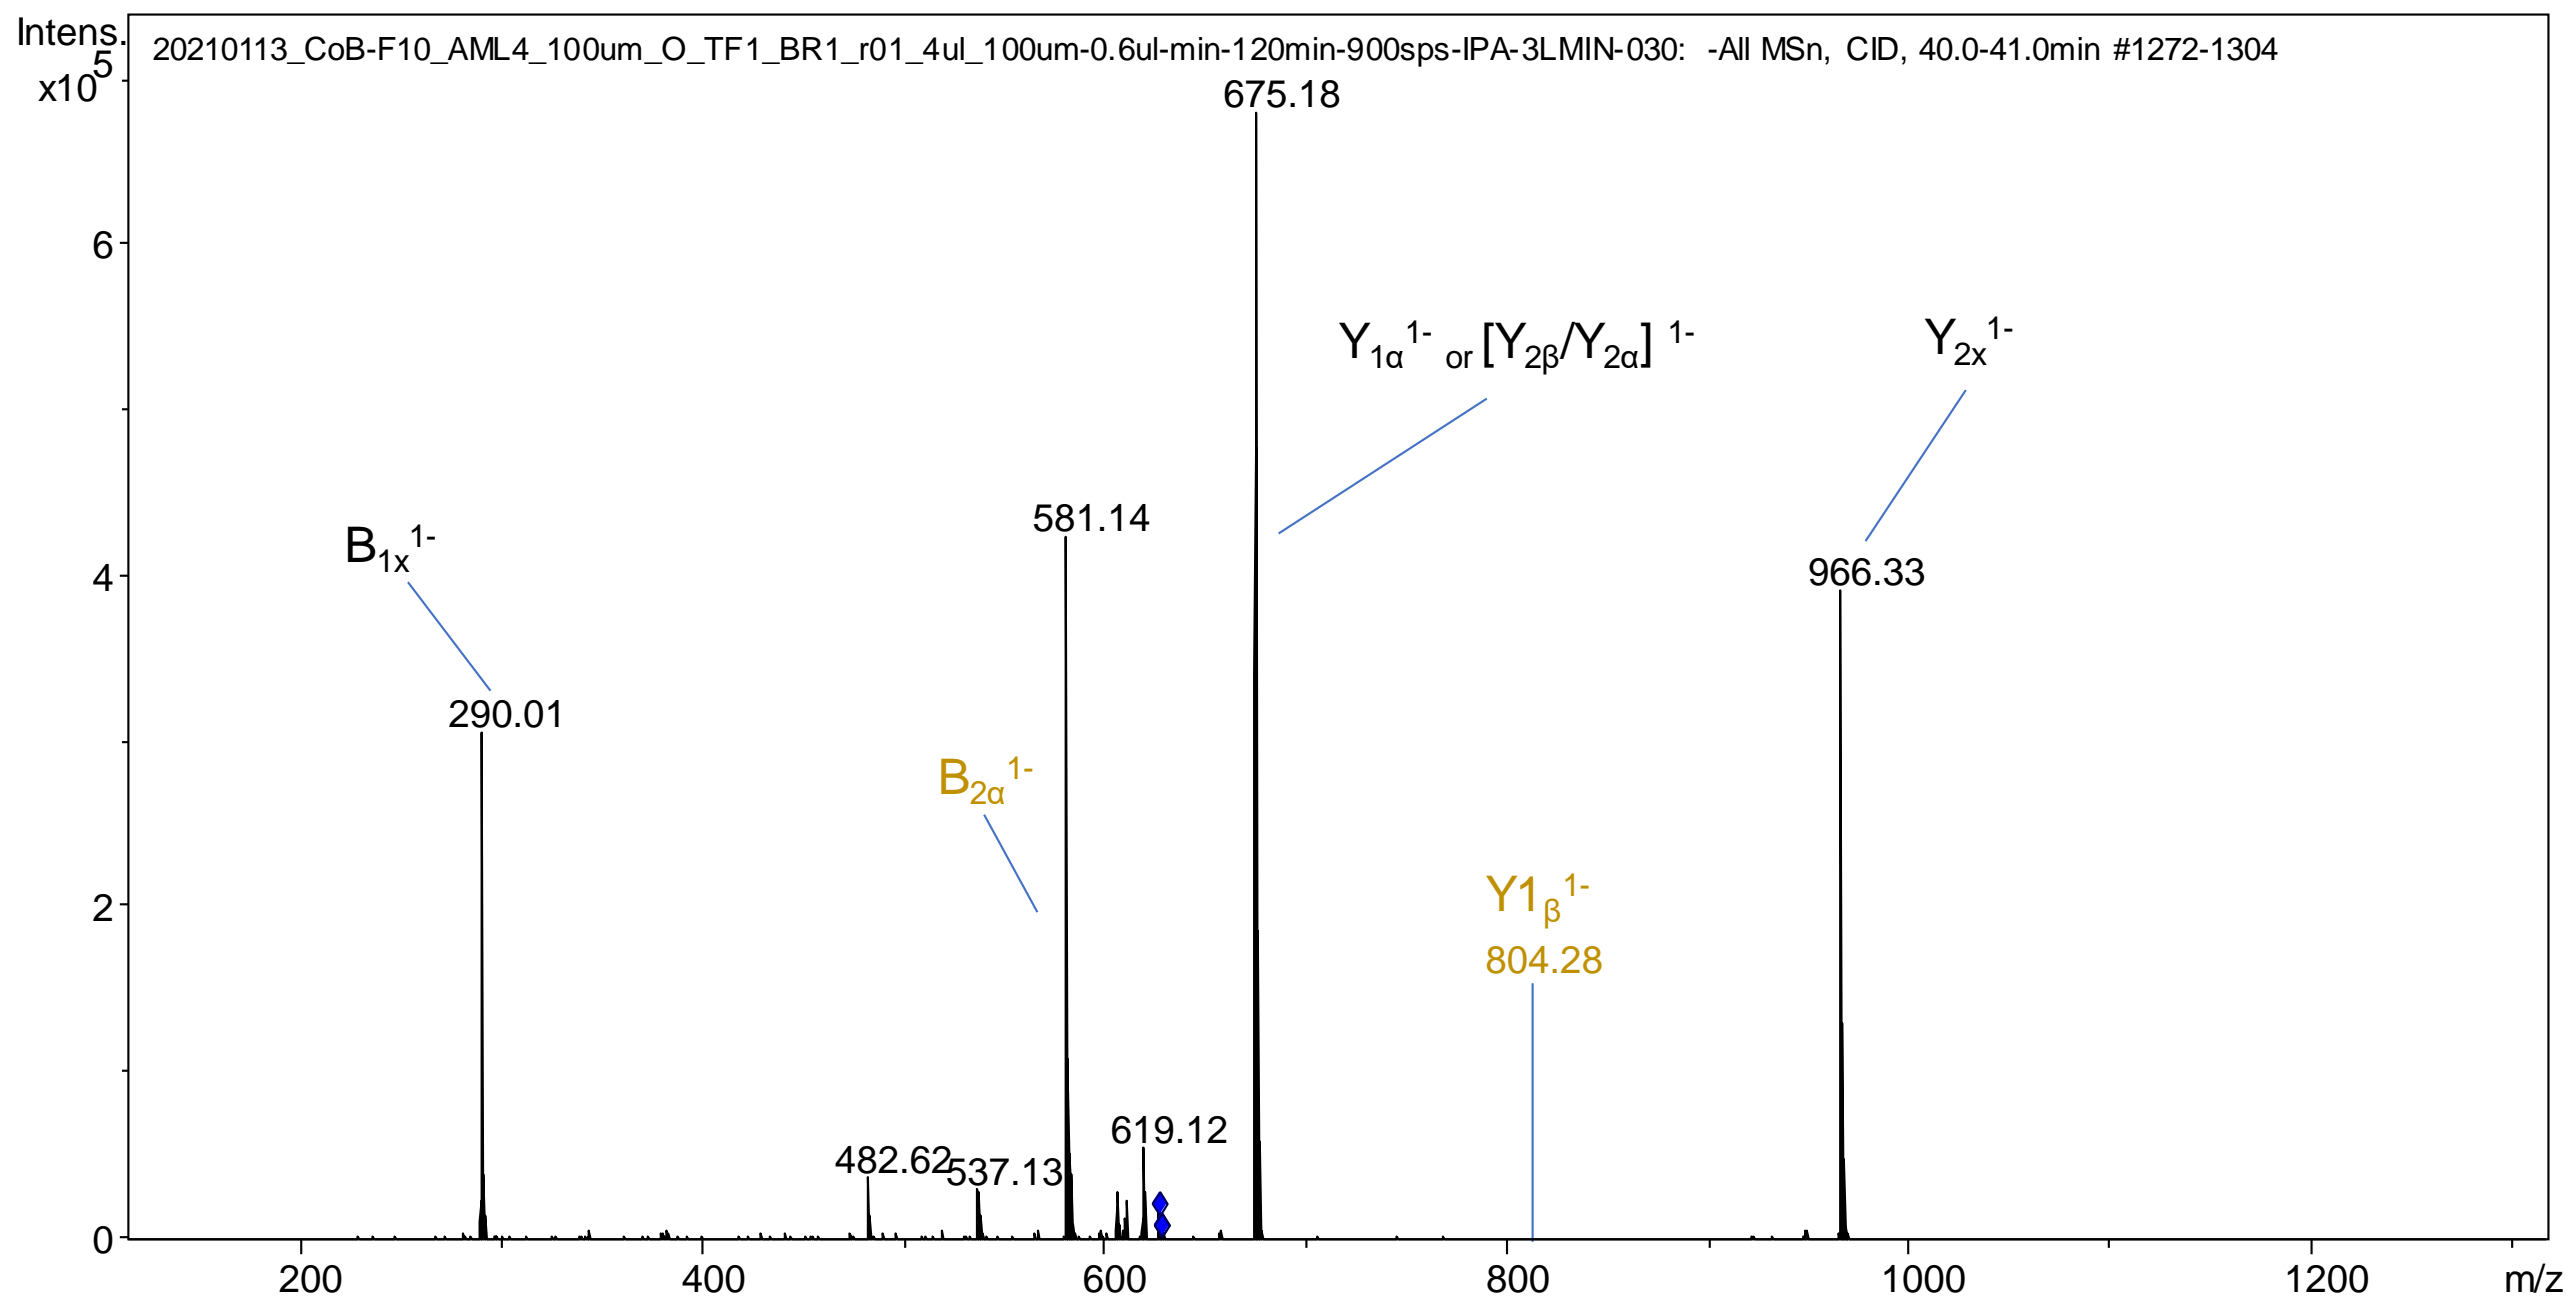

$$\text{H}_2\text{N}_2\text{S}_2$$

Depicted MS<sup>2</sup> was obtained from analysis of cell line: HL-60

|                           |                           |
|---------------------------|---------------------------|
| <b>Monoisotopic mass:</b> | <b>1332.48 Da</b>         |
| <b>Charge observed:</b>   | <b>1-</b>                 |
| <b>Theoretical ion:</b>   | <b><i>m/z</i> 1331.47</b> |
| <b>Observed ion:</b>      | <b><i>m/z</i> 1331.44</b> |
| <b>Mass deviation:</b>    | <b><i>m/z</i> 0.03</b>    |
| <b>Retention time:</b>    | <b>65.4 min</b>           |

**UniCarb-DB: #502**

**Note::  $\alpha$ -2,3 linkage of both sialic acids confirmed by neuraminidase S and A treatment as no species were detected with  $\alpha$ -2,6 as a digested H2N2S1**

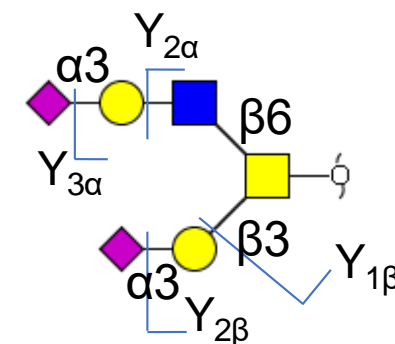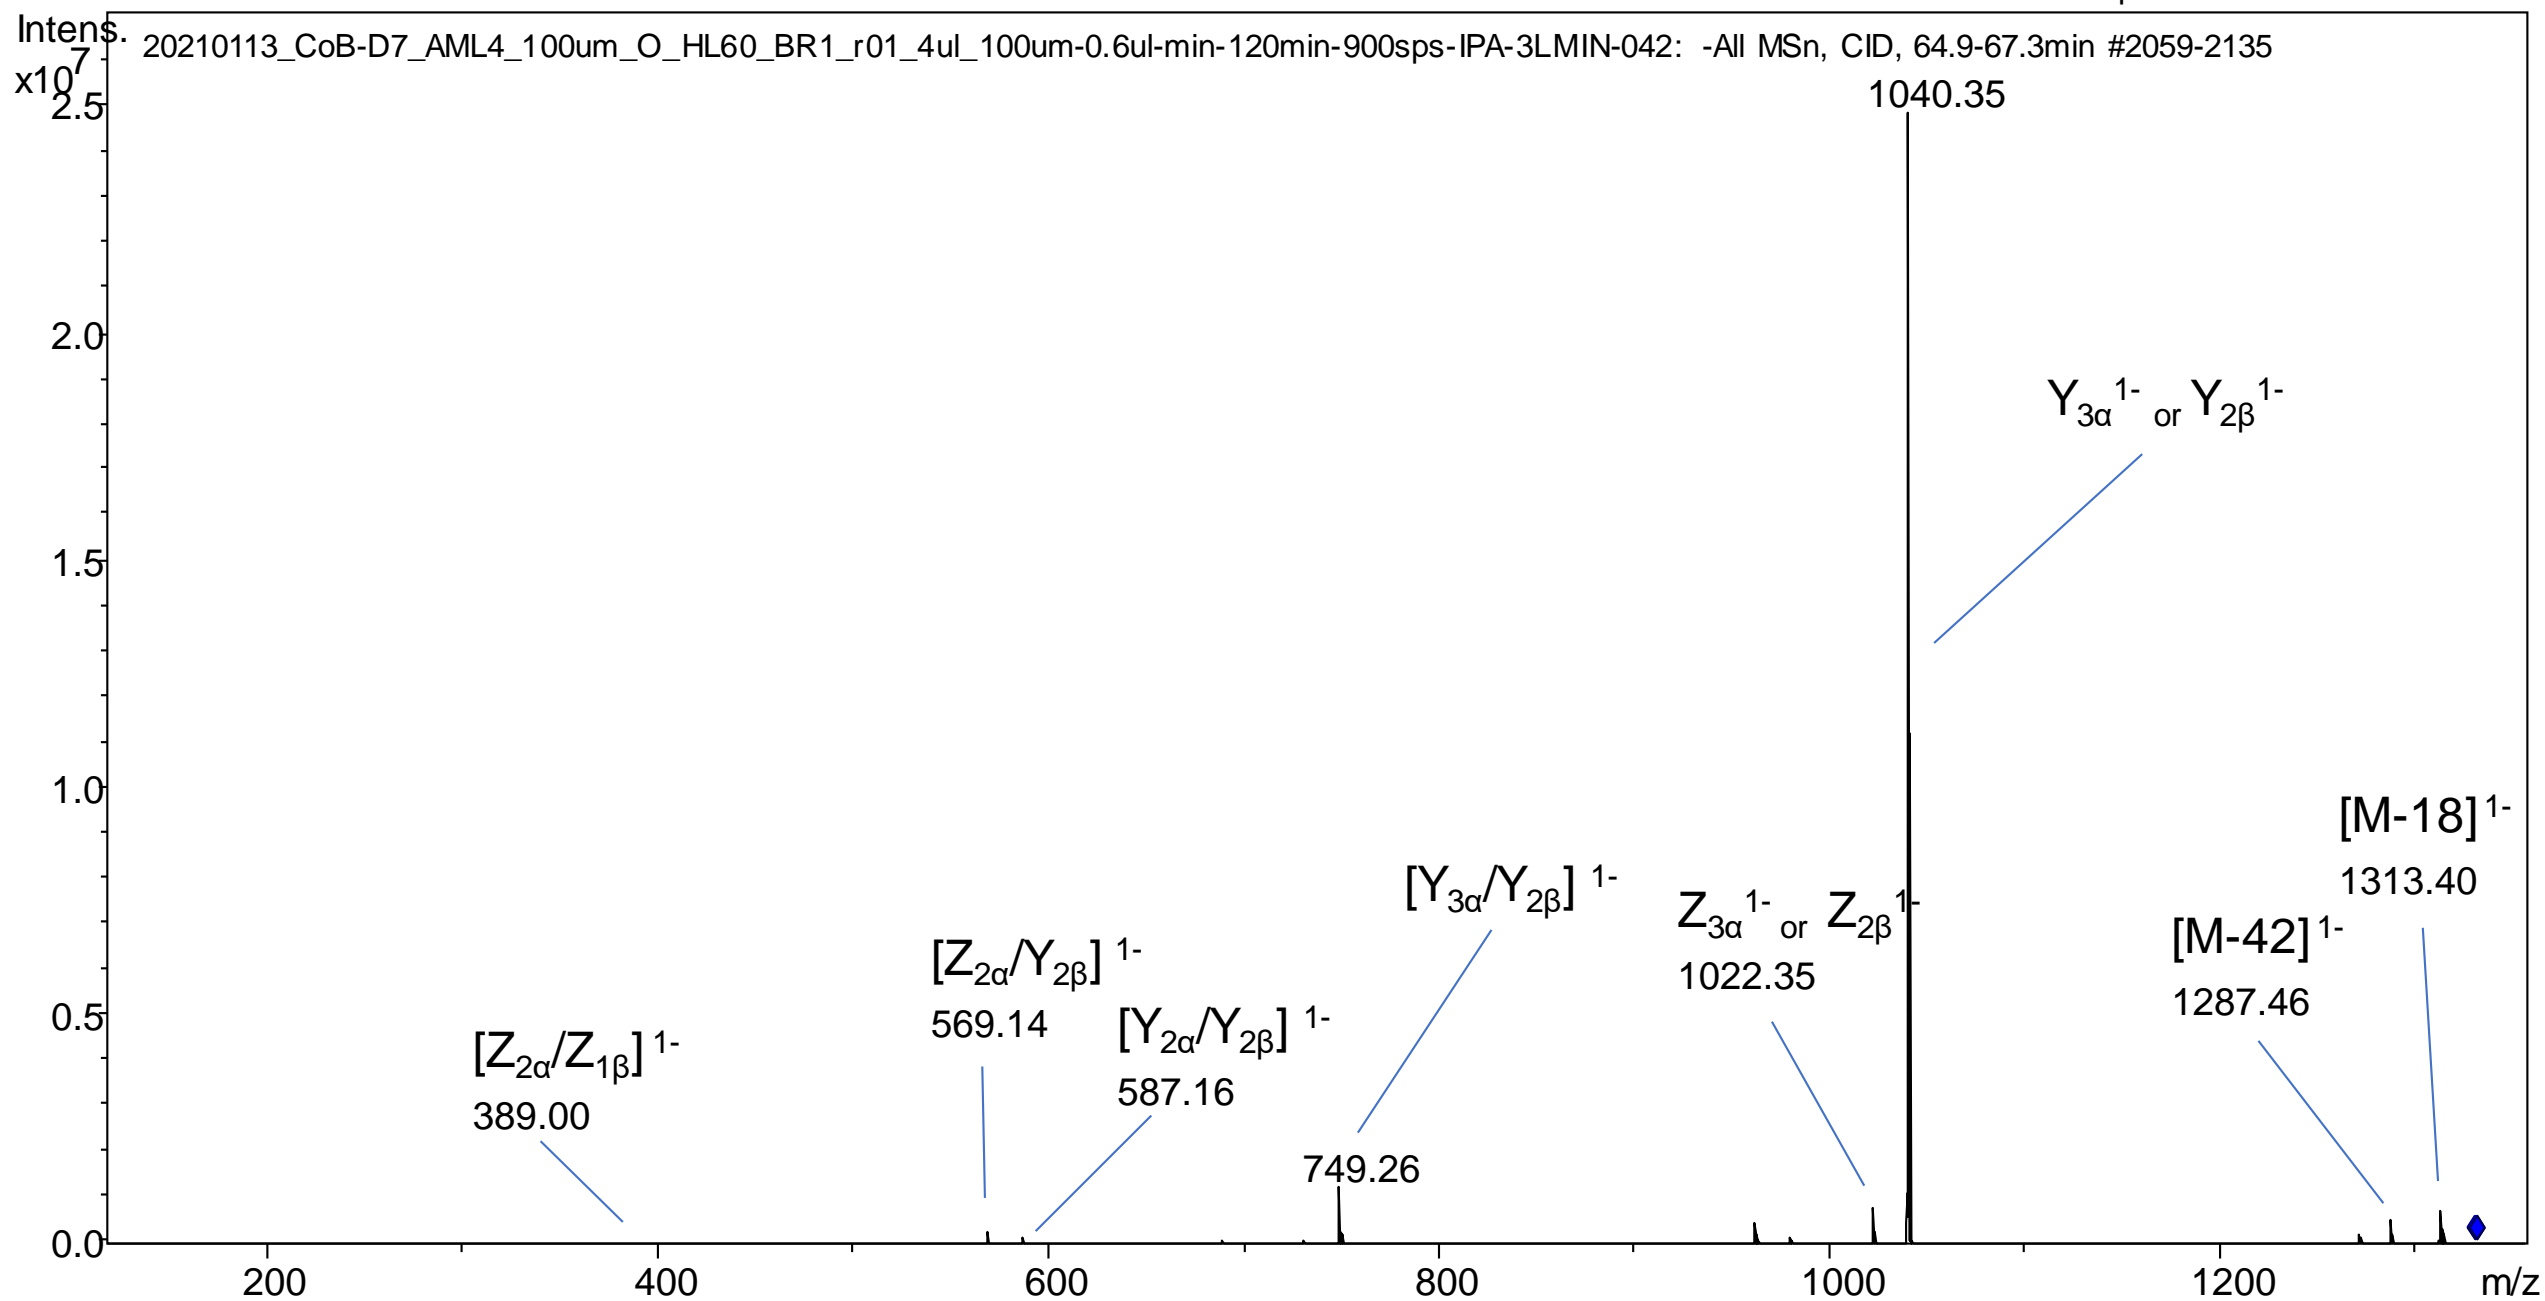

$$\text{H}_2\text{N}_2\text{S}_2$$

|                           |                          |
|---------------------------|--------------------------|
| <b>Monoisotopic mass:</b> | <b>1332.48 Da</b>        |
| <b>Charge observed:</b>   | <b>2-</b>                |
| <b>Theoretical ion:</b>   | <b><i>m/z</i> 665.23</b> |
| <b>Observed ion:</b>      | <b><i>m/z</i> 665.19</b> |
| <b>Mass deviation:</b>    | <b><i>m/z</i> 0.04</b>   |
| <b>Retention time:</b>    | <b>65.4 min</b>          |

**Note::  $\alpha$ -2,3 linkage of both sialic acids confirmed by neuraminidase S and treatment as no species were detected with  $\alpha$ -2,6 as a digested H2N2S1**

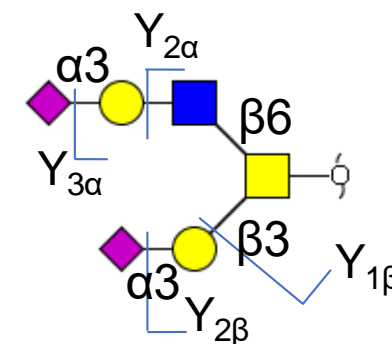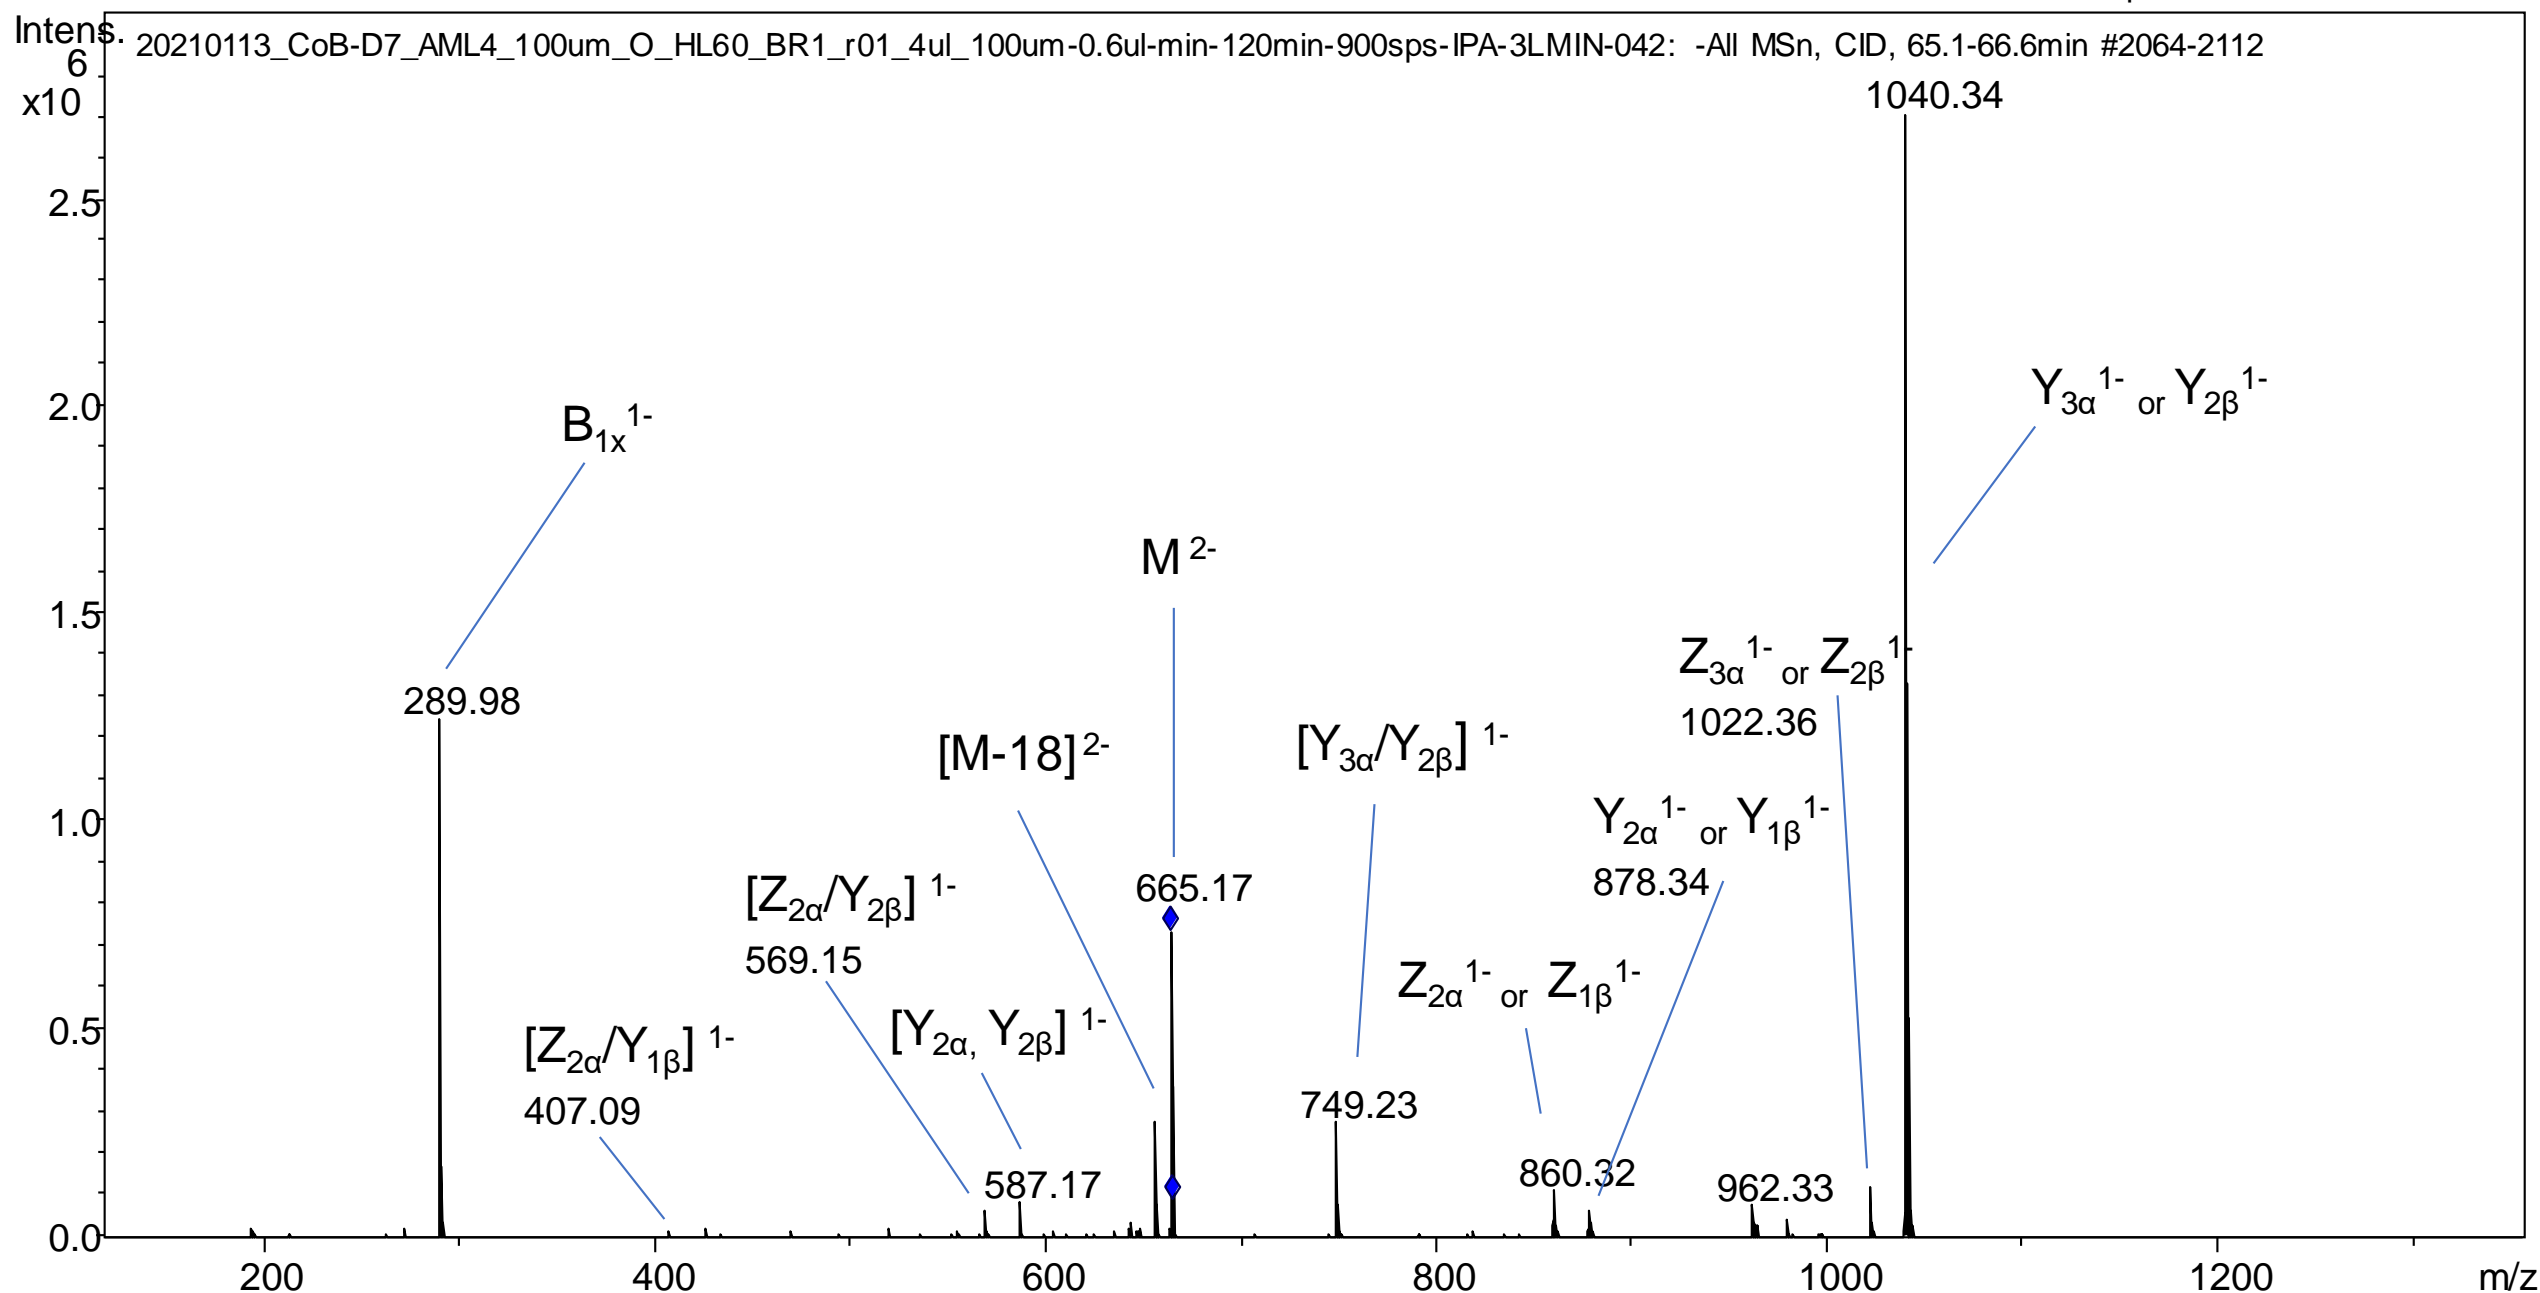

## H2N2S2Su1

Depicted MS<sup>2</sup> was obtained from analysis of cell line: TF-1

|                           |                          |
|---------------------------|--------------------------|
| <b>Monoisotopic mass:</b> | <b>1412.44 Da</b>        |
| <b>Charge observed:</b>   | <b>2-</b>                |
| <b>Theoretical ion:</b>   | <b><i>m/z</i> 705.21</b> |
| <b>Observed ion:</b>      | <b><i>m/z</i> 705.14</b> |
| <b>Mass deviation:</b>    | <b><i>m/z</i> 0.07</b>   |
| <b>Retention time:</b>    | <b>58.3 min</b>          |

**Note:  $\alpha$ -2,3 linkage of both sialic acids confirmed by neuraminidase S and A treatment as no species were detected with  $\alpha$ -2,6 as a digested H2N2S1Su1**

**UniCarb-DB: #2650**

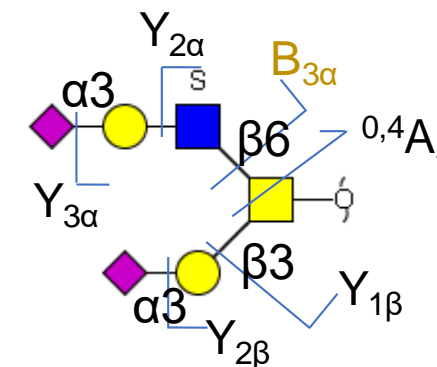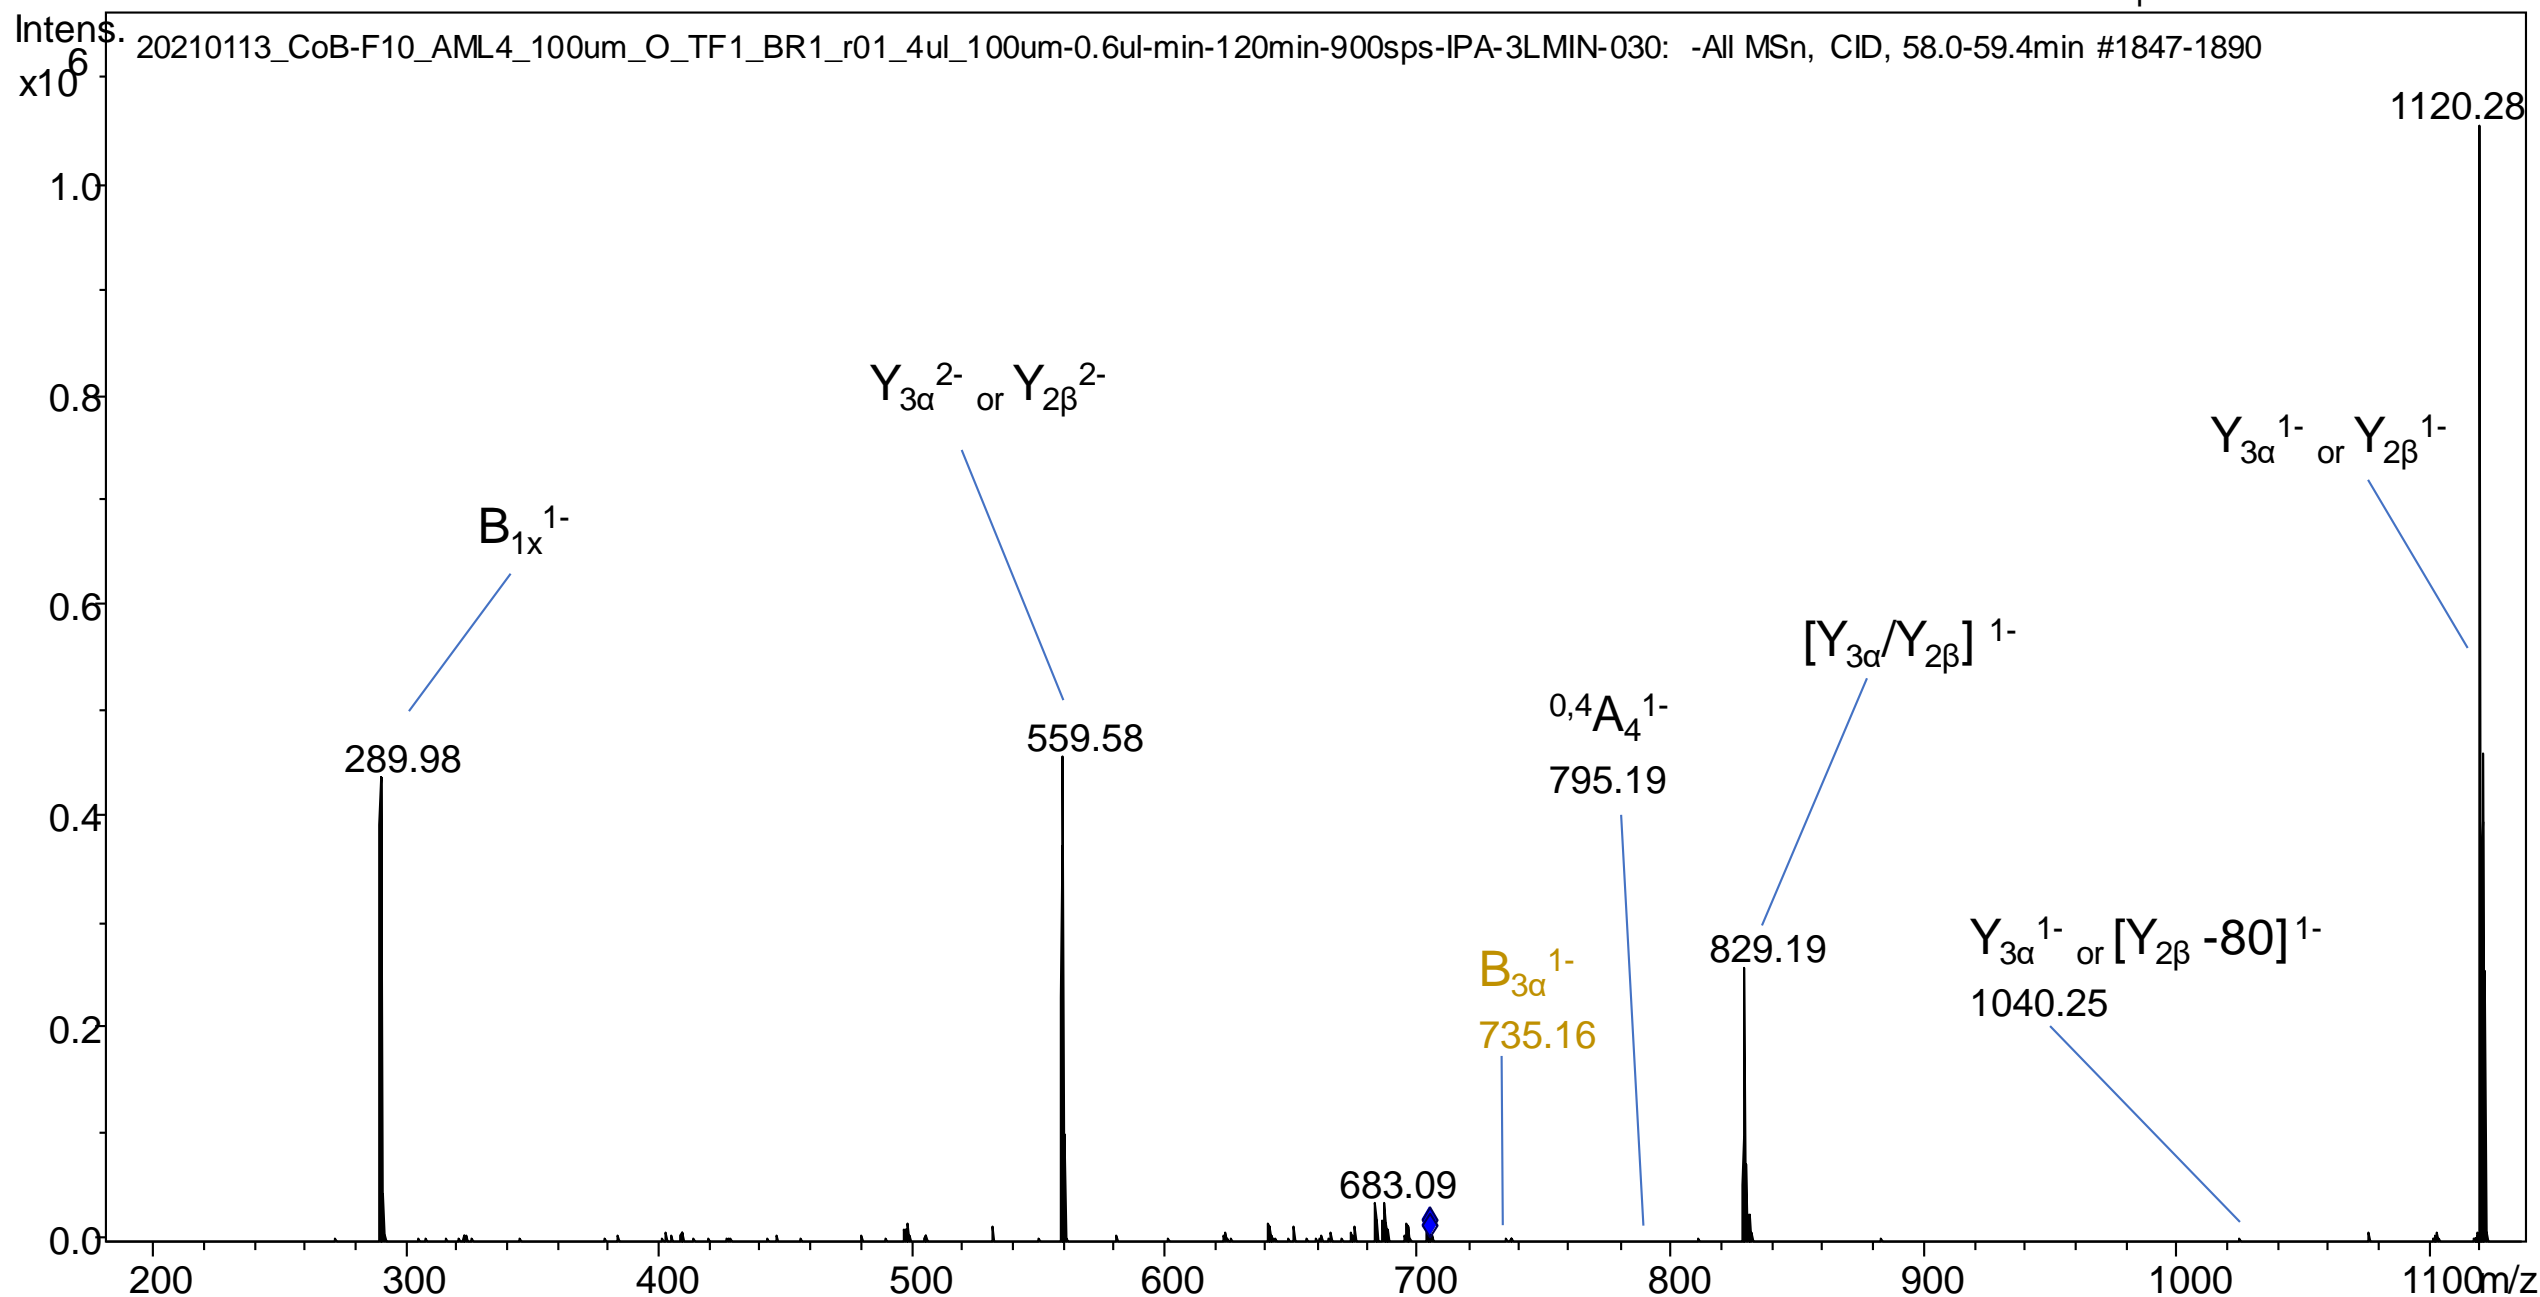

H2N2F1S2

|                           |                          |
|---------------------------|--------------------------|
| <b>Monoisotopic mass:</b> | <b>1478.54 Da</b>        |
| <b>Charge observed:</b>   | <b>2-</b>                |
| <b>Theoretical ion:</b>   | <b><i>m/z</i> 738.26</b> |
| <b>Observed ion:</b>      | <b><i>m/z</i> 738.21</b> |
| <b>Mass deviation:</b>    | <b><i>m/z</i> 0.05</b>   |
| <b>Retention time:</b>    | <b>54.6 min</b>          |

**Note:  $\alpha$ -2,3 linkage of both sialic acids confirmed by neuraminidase S and A treatment as no species were detected with  $\alpha$ -2,6 as a digested H2N2F1S1;  $m/z$  364 fragment indicates Lewis x**

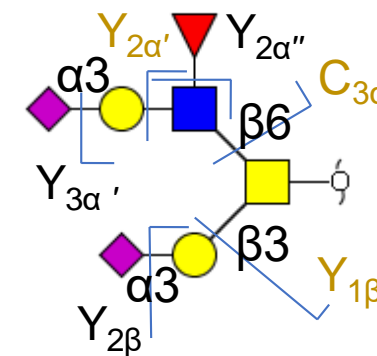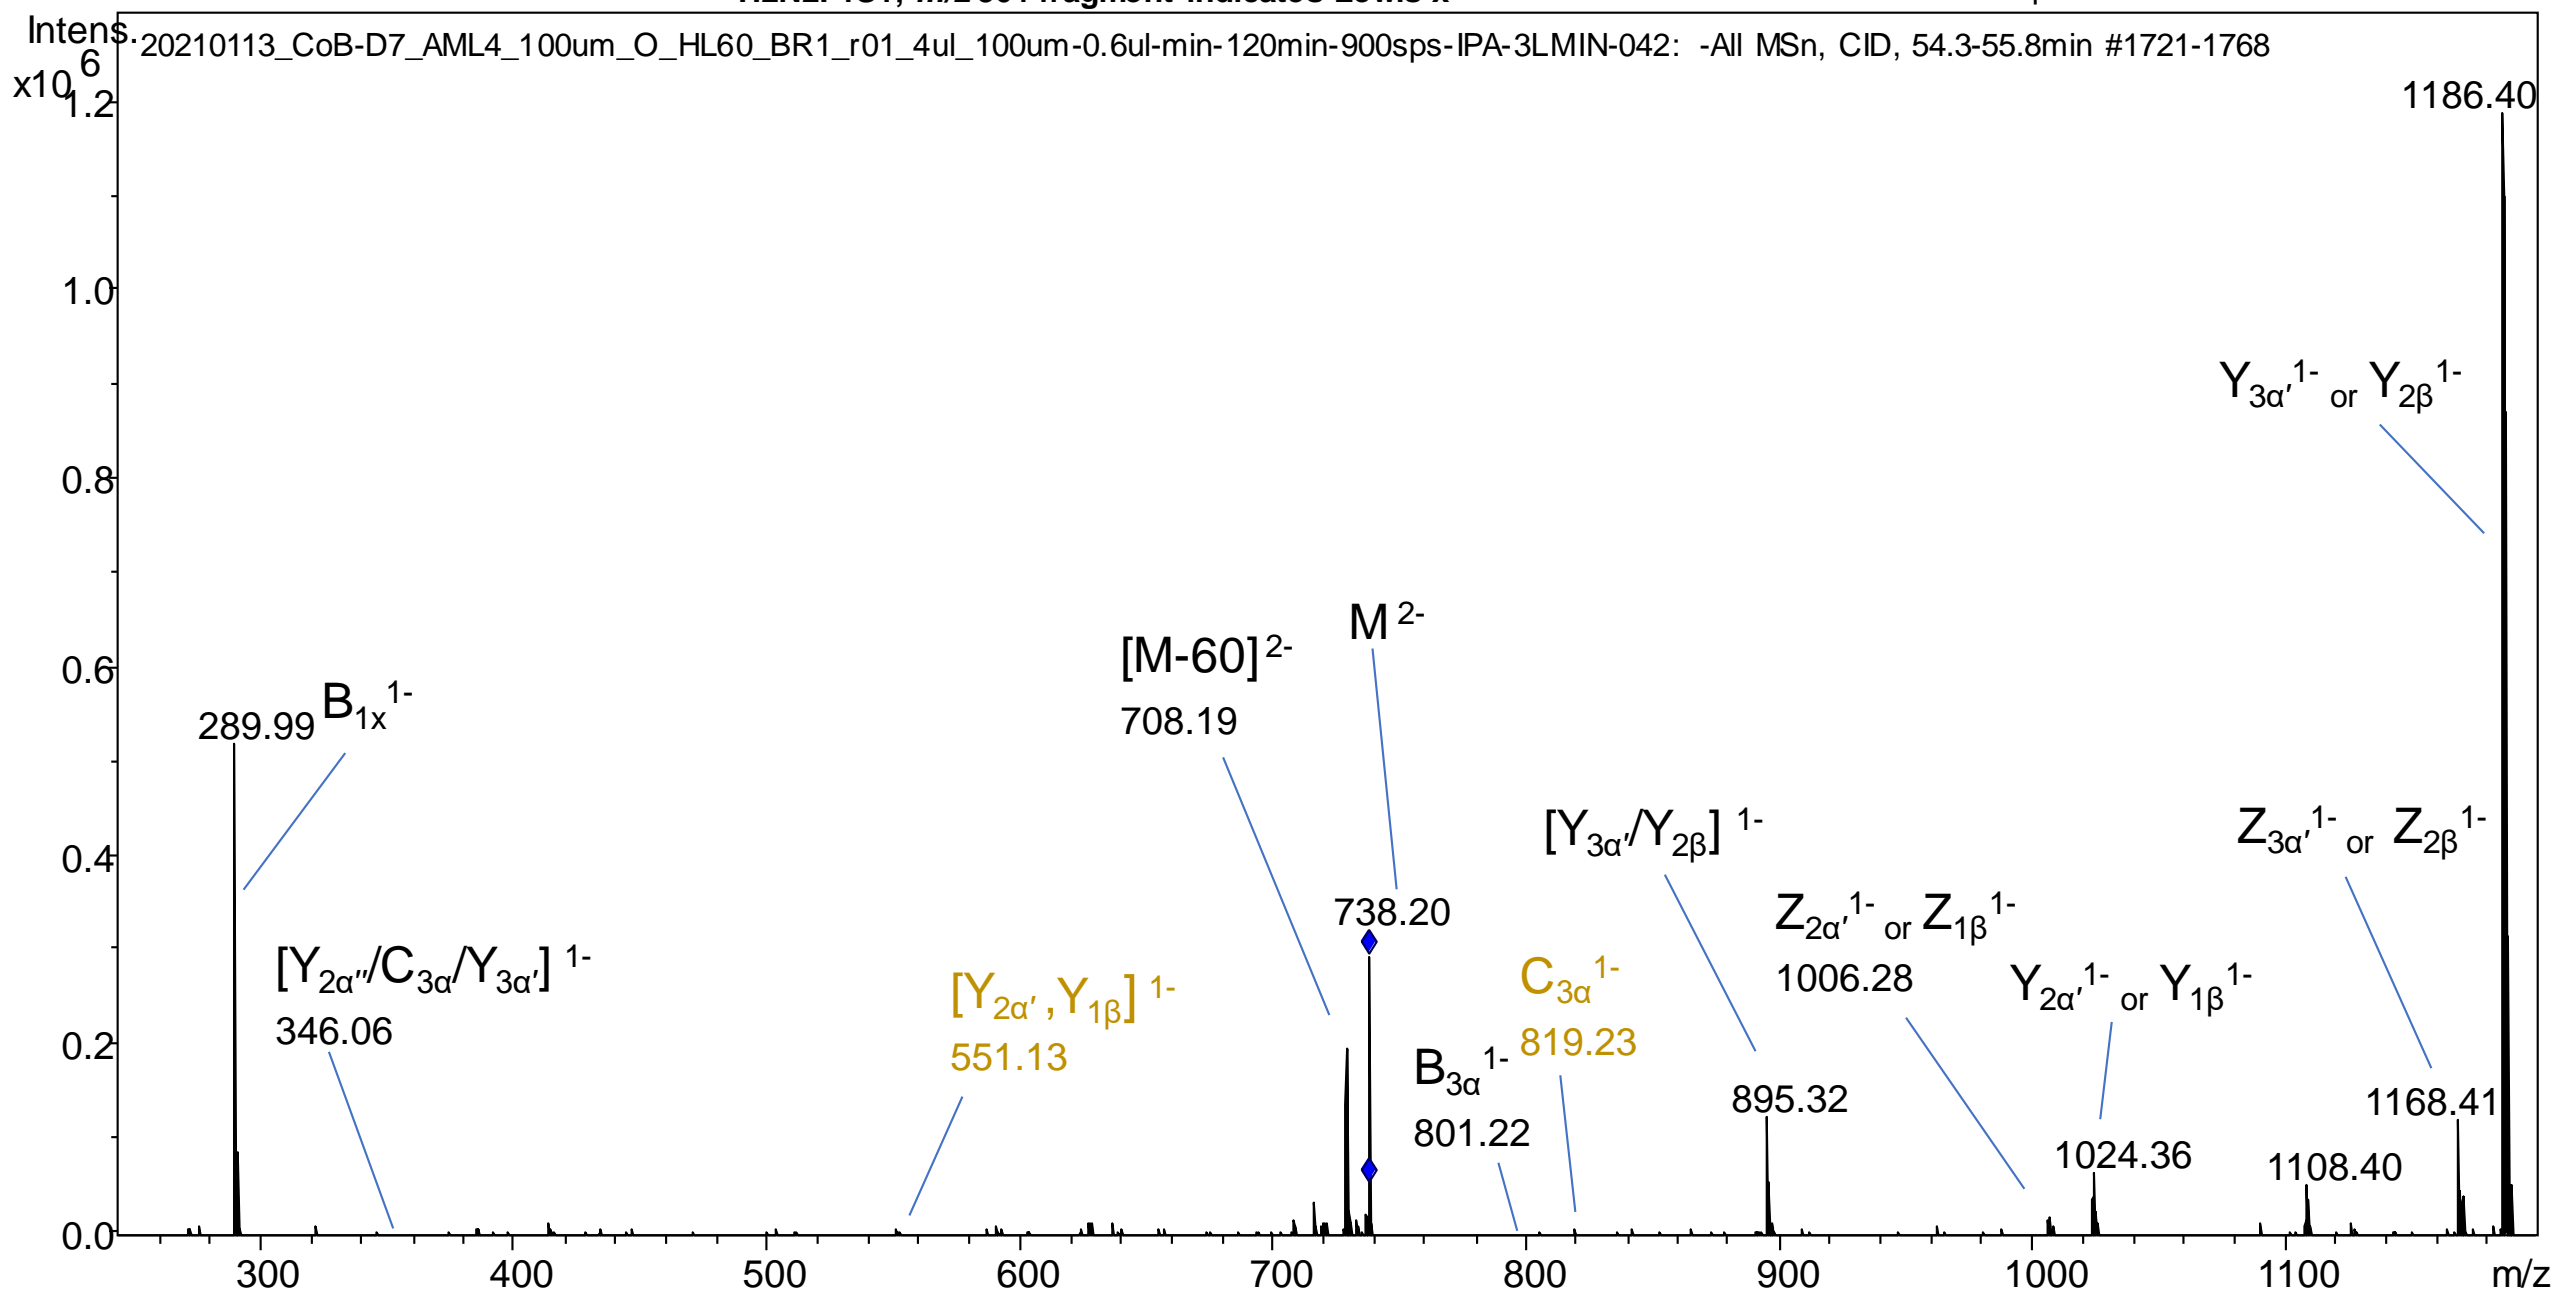

H2N2F1S2Su1

**Depicted MS<sup>2</sup> was obtained from analysis of cell line: M-07e**

|                           |                          |
|---------------------------|--------------------------|
| <b>Monoisotopic mass:</b> | <b>1558.50 Da</b>        |
| <b>Charge observed:</b>   | <b>2-</b>                |
| <b>Theoretical ion:</b>   | <b><i>m/z</i> 778.25</b> |
| <b>Observed ion:</b>      | <b><i>m/z</i> 778.20</b> |
| <b>Mass deviation:</b>    | <b><i>m/z</i> 0.05</b>   |
| <b>Retention time:</b>    | <b>51.6 min</b>          |

**UniCarb-DB: #2947**

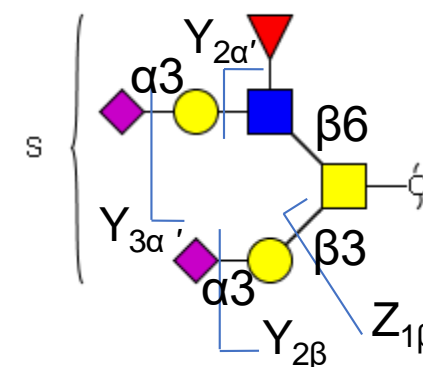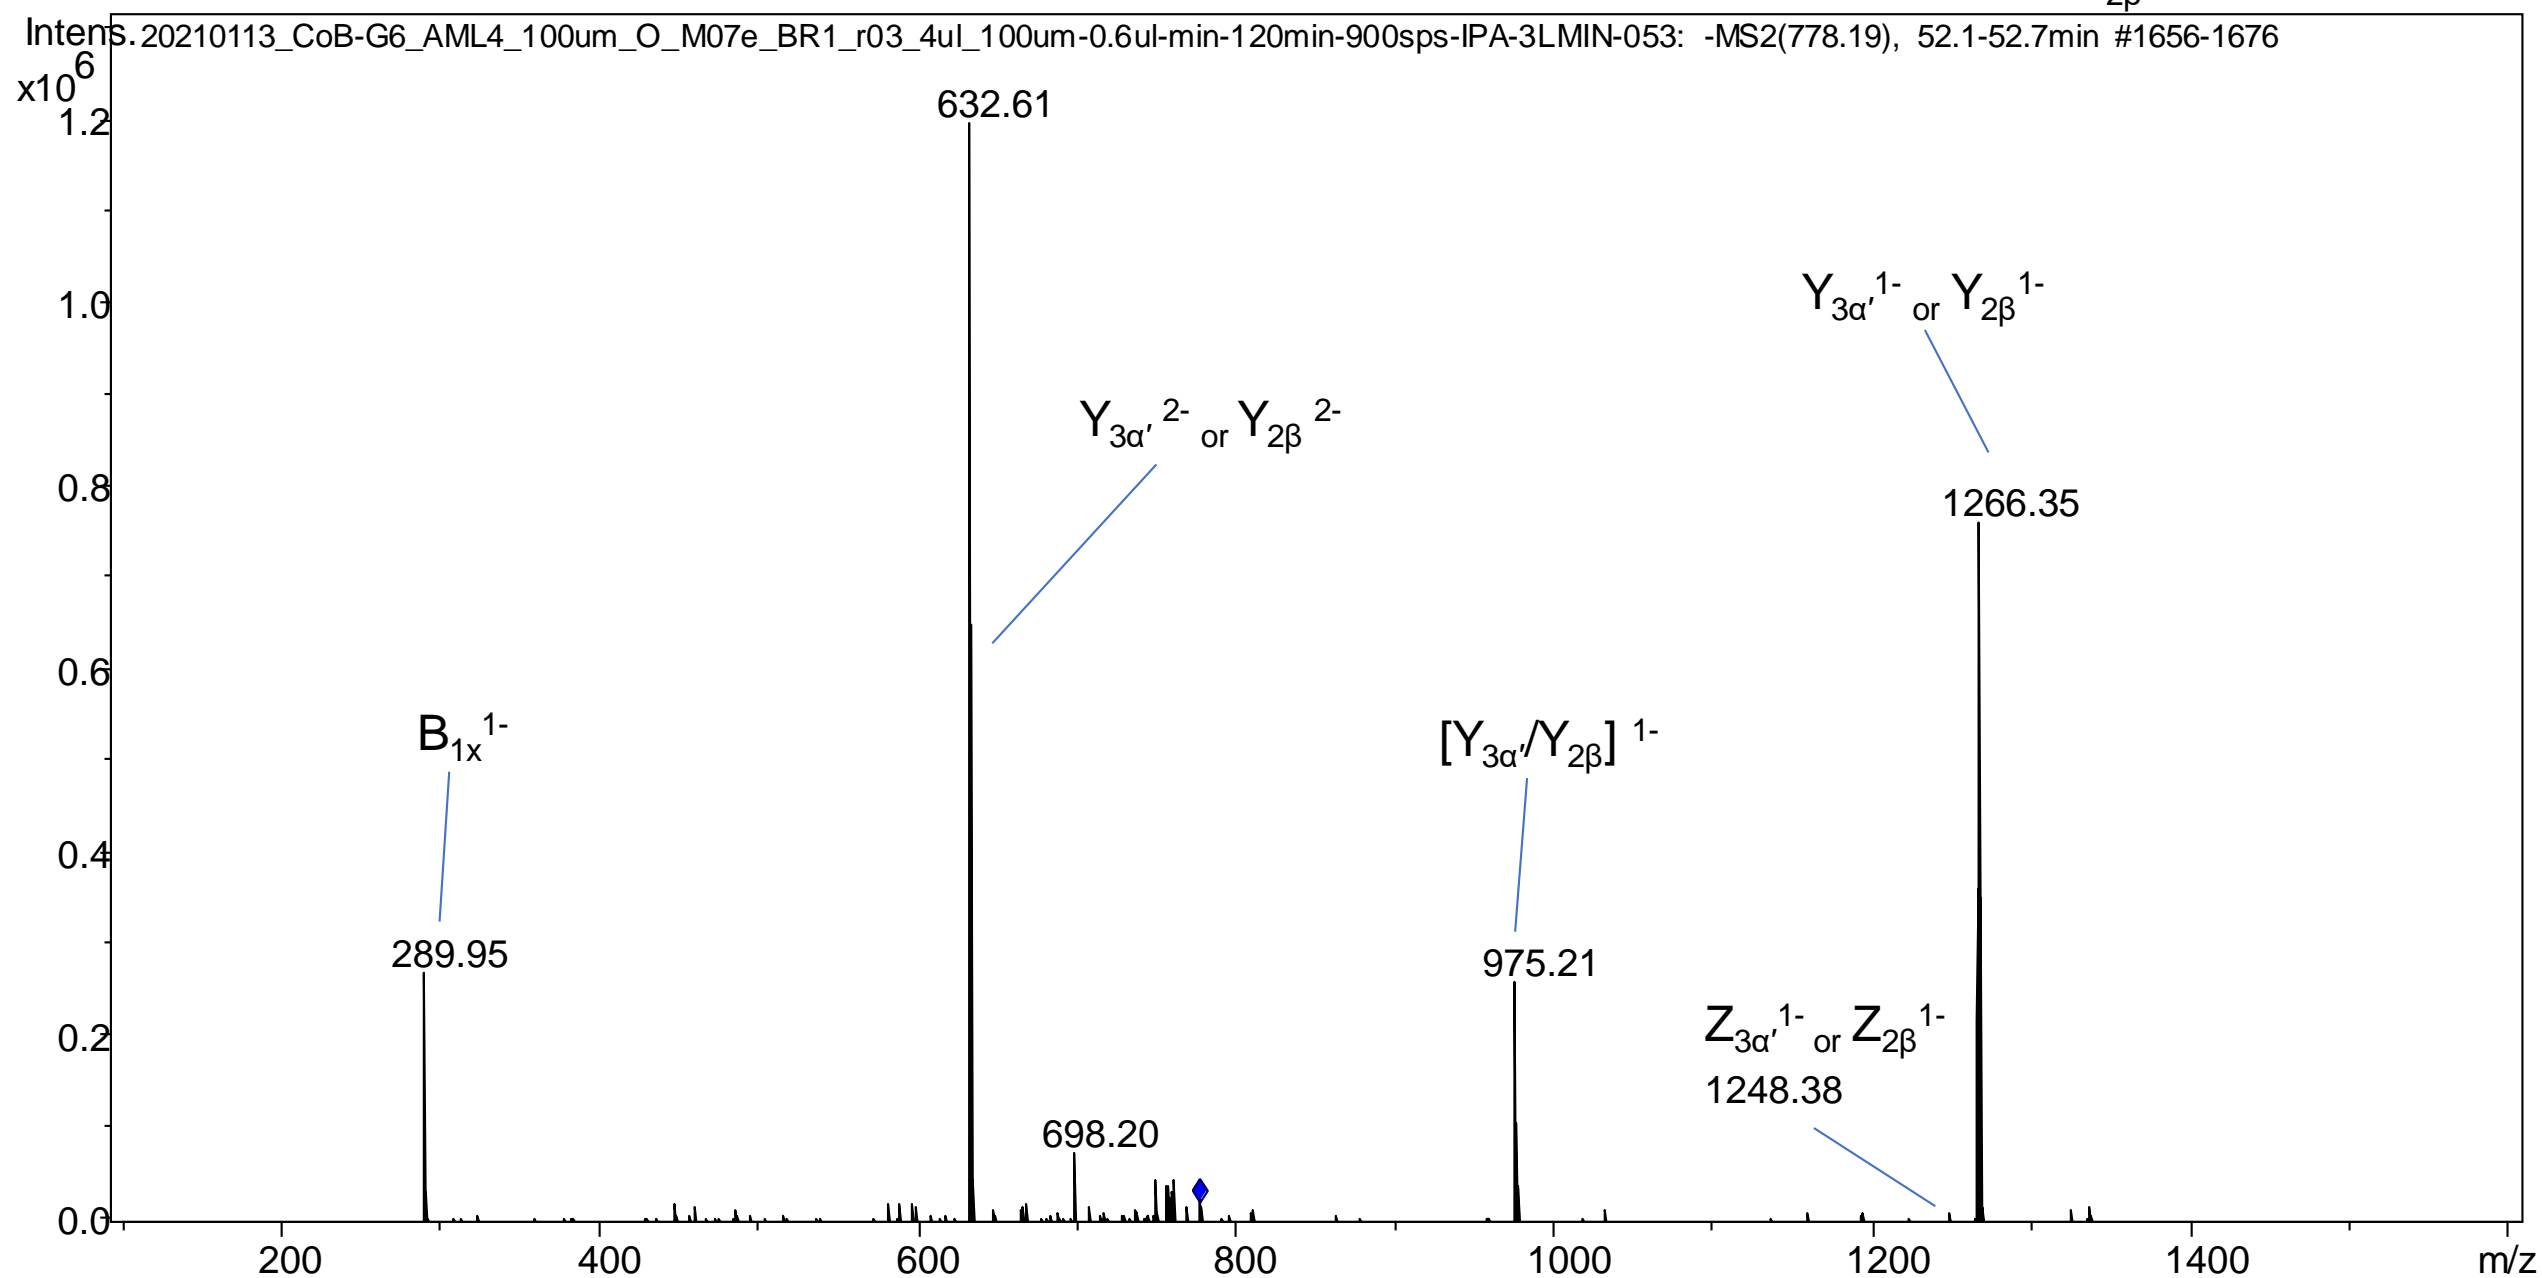

# Glycan 18a

H3N3S2

Depicted MS<sup>2</sup> was obtained from  
analysis of cell line: TF-1

Monoisotopic mass: 1697.61 Da  
Charge observed: 2-  
Theoretical ion: *m/z* 847.80  
Observed ion: *m/z* 847.76  
Mass deviation: *m/z* 0.04  
Retention time: 77.0 min

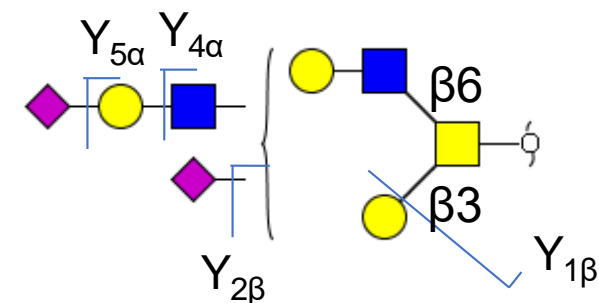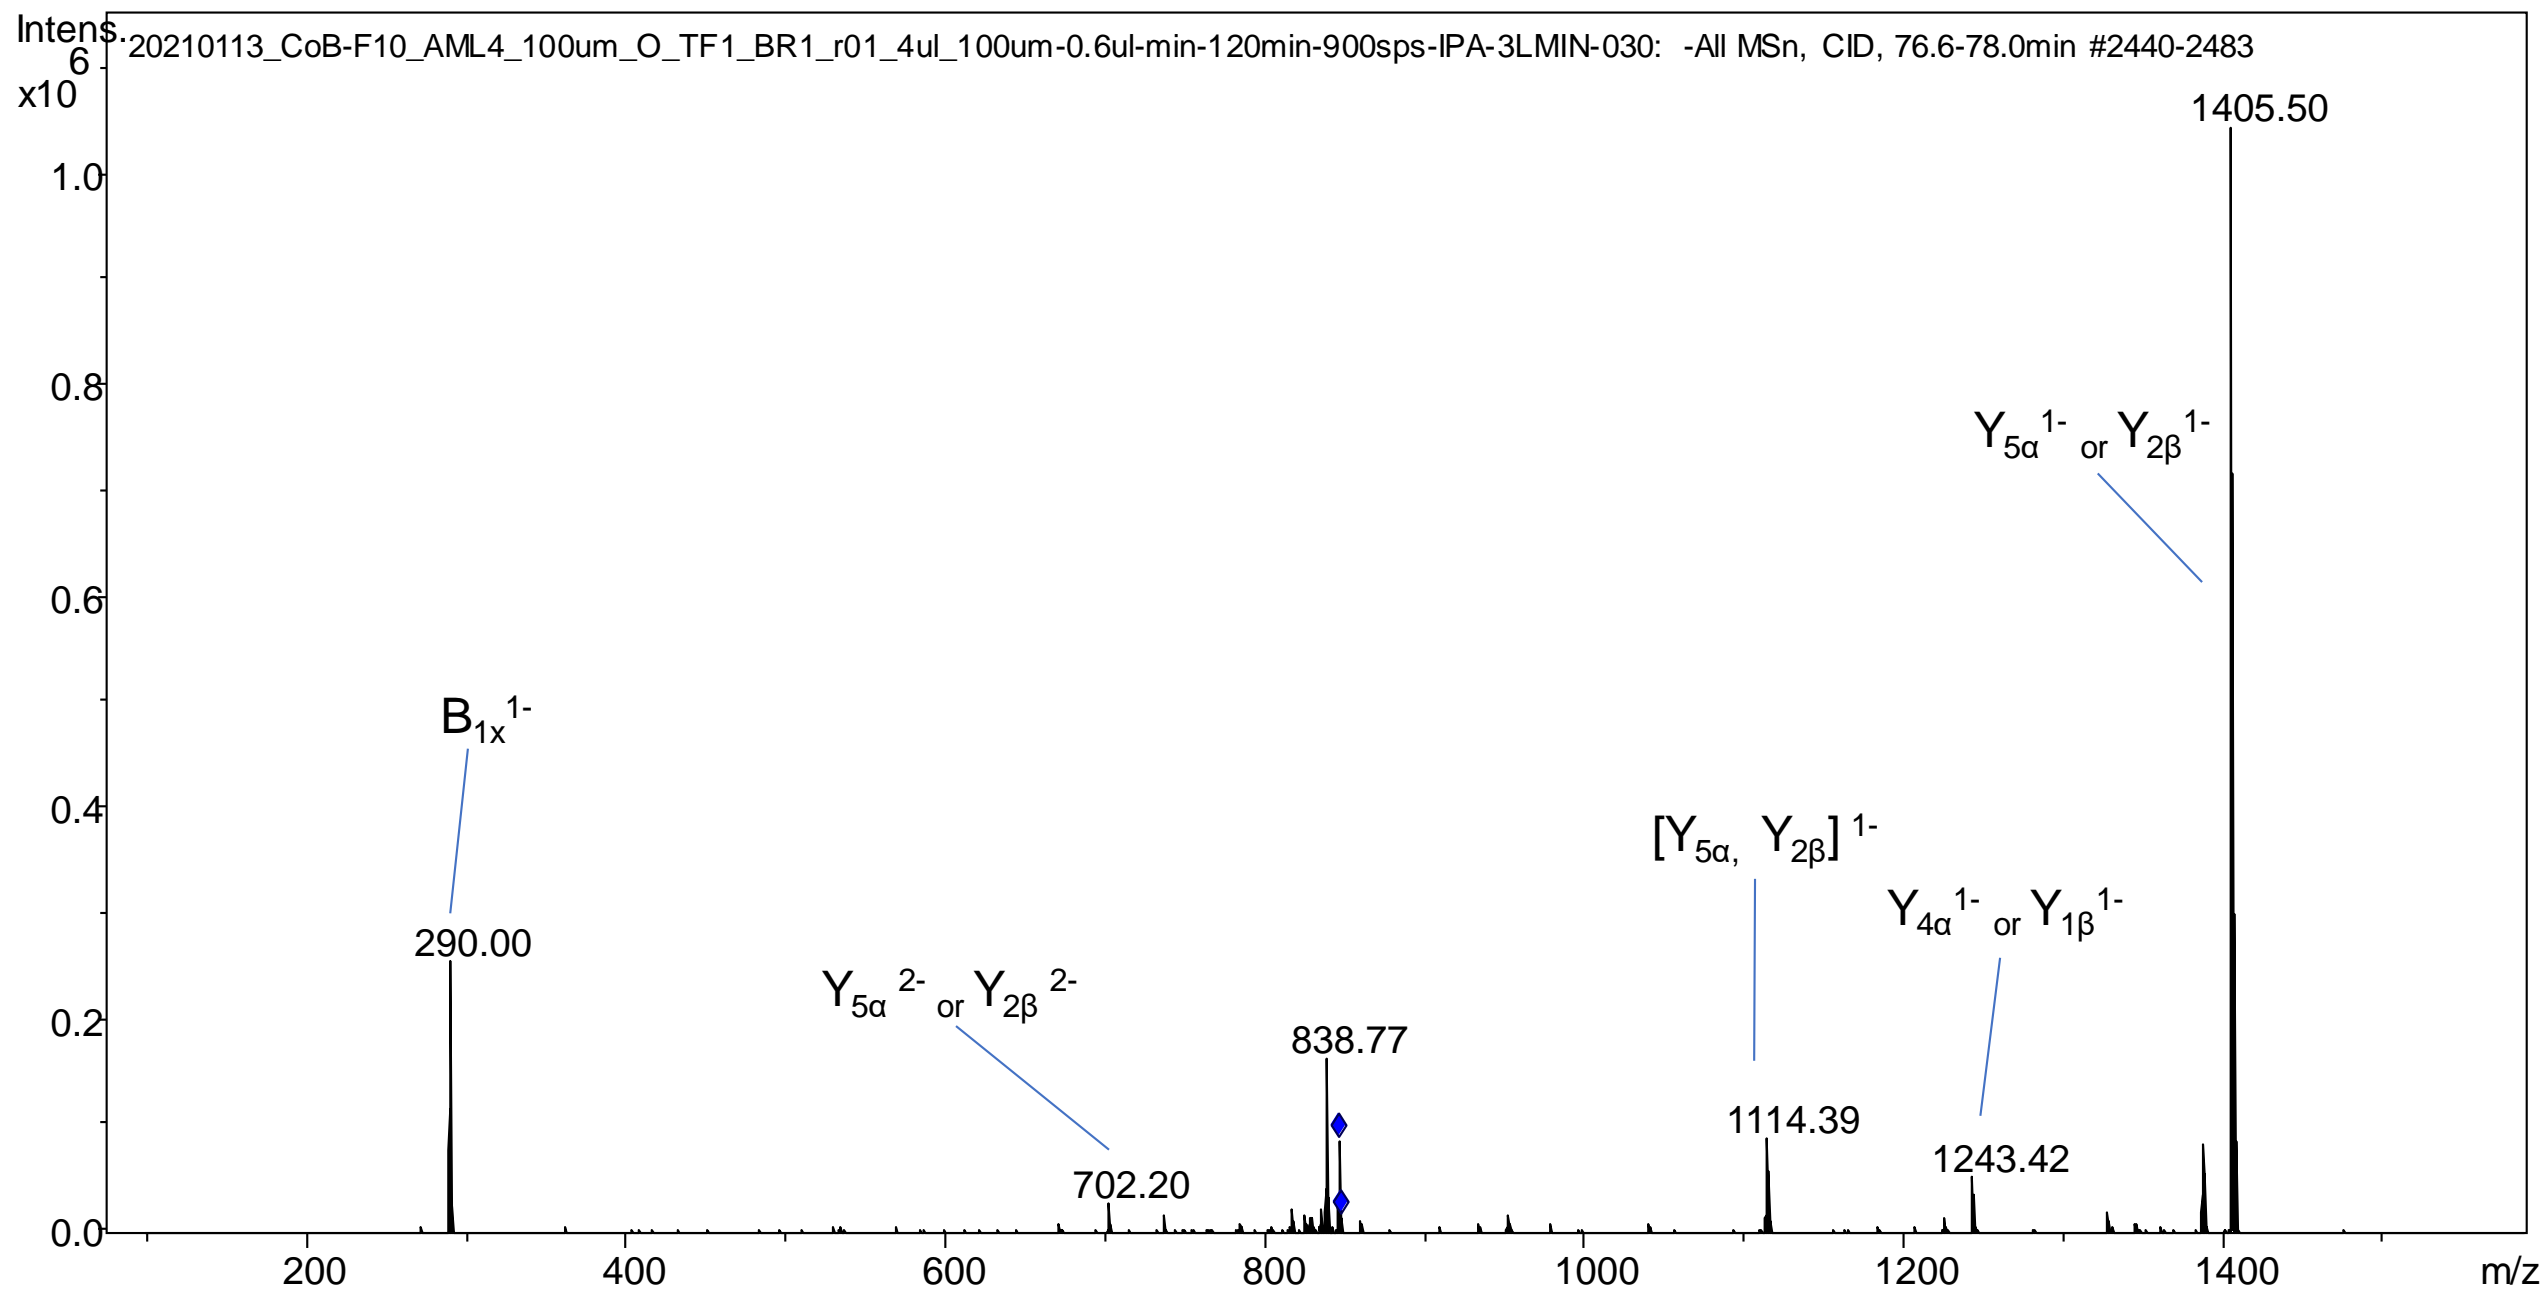



# Glycan 18b

## H3N3S2

Depicted MS<sup>2</sup> was obtained from  
analysis of cell line: HL-60

Monoisotopic mass: 1697.61 Da  
Charge observed: 2-  
Theoretical ion: *m/z* 847.80  
Observed ion: *m/z* 847.75  
Mass deviation: *m/z* 0.05  
Retention time: 82.1 min

Note:  $\alpha$ -2,3 linkage of both sialic acids confirmed by neuraminidase S  
and A treatment as no species were detected with  $\alpha$ -2,6 as H3N3S1

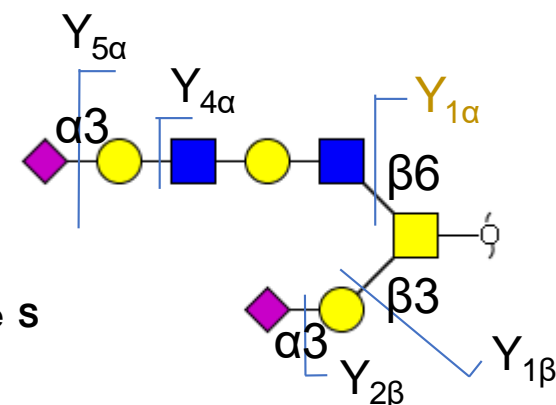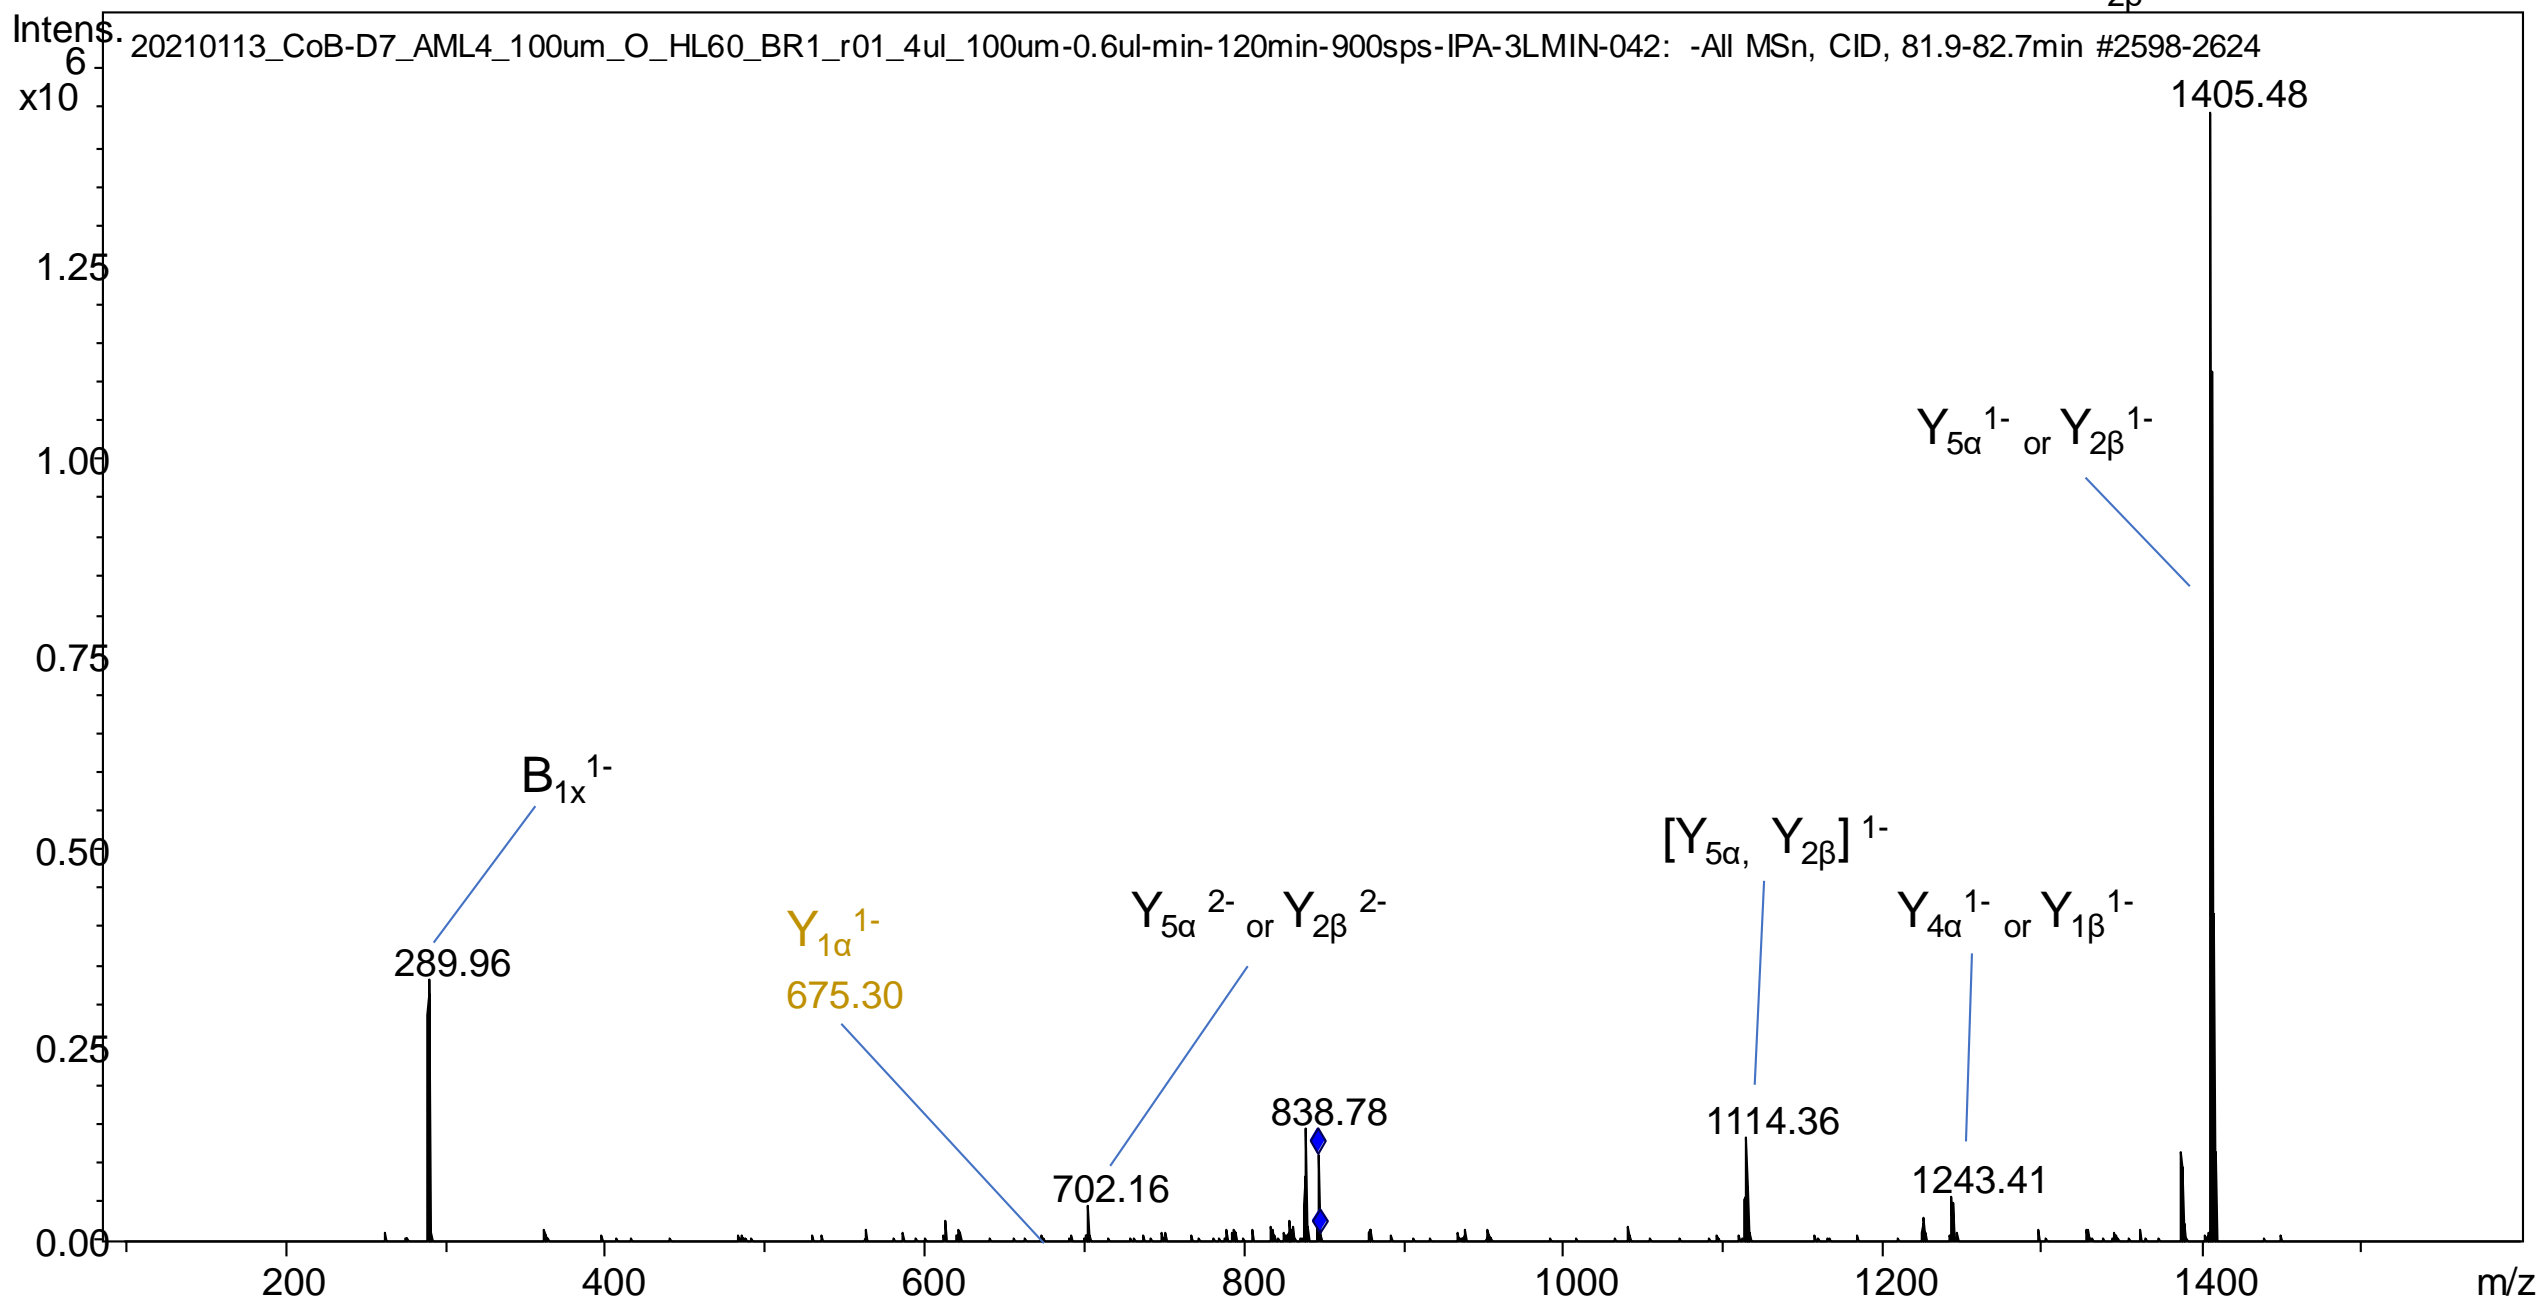

# Glycan 19

H3N3F1S2

Depicted MS<sup>2</sup> was obtained from  
analysis of cell line: HL-60

Monoisotopic mass: 1843.67 Da  
Charge observed: 2-  
Theoretical ion: *m/z* 920.79  
Observed ion: *m/z* 920.77  
Mass deviation: *m/z* 0.02  
Retention time: 69.2 min

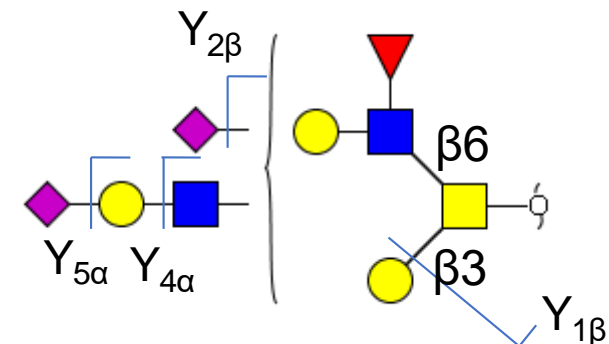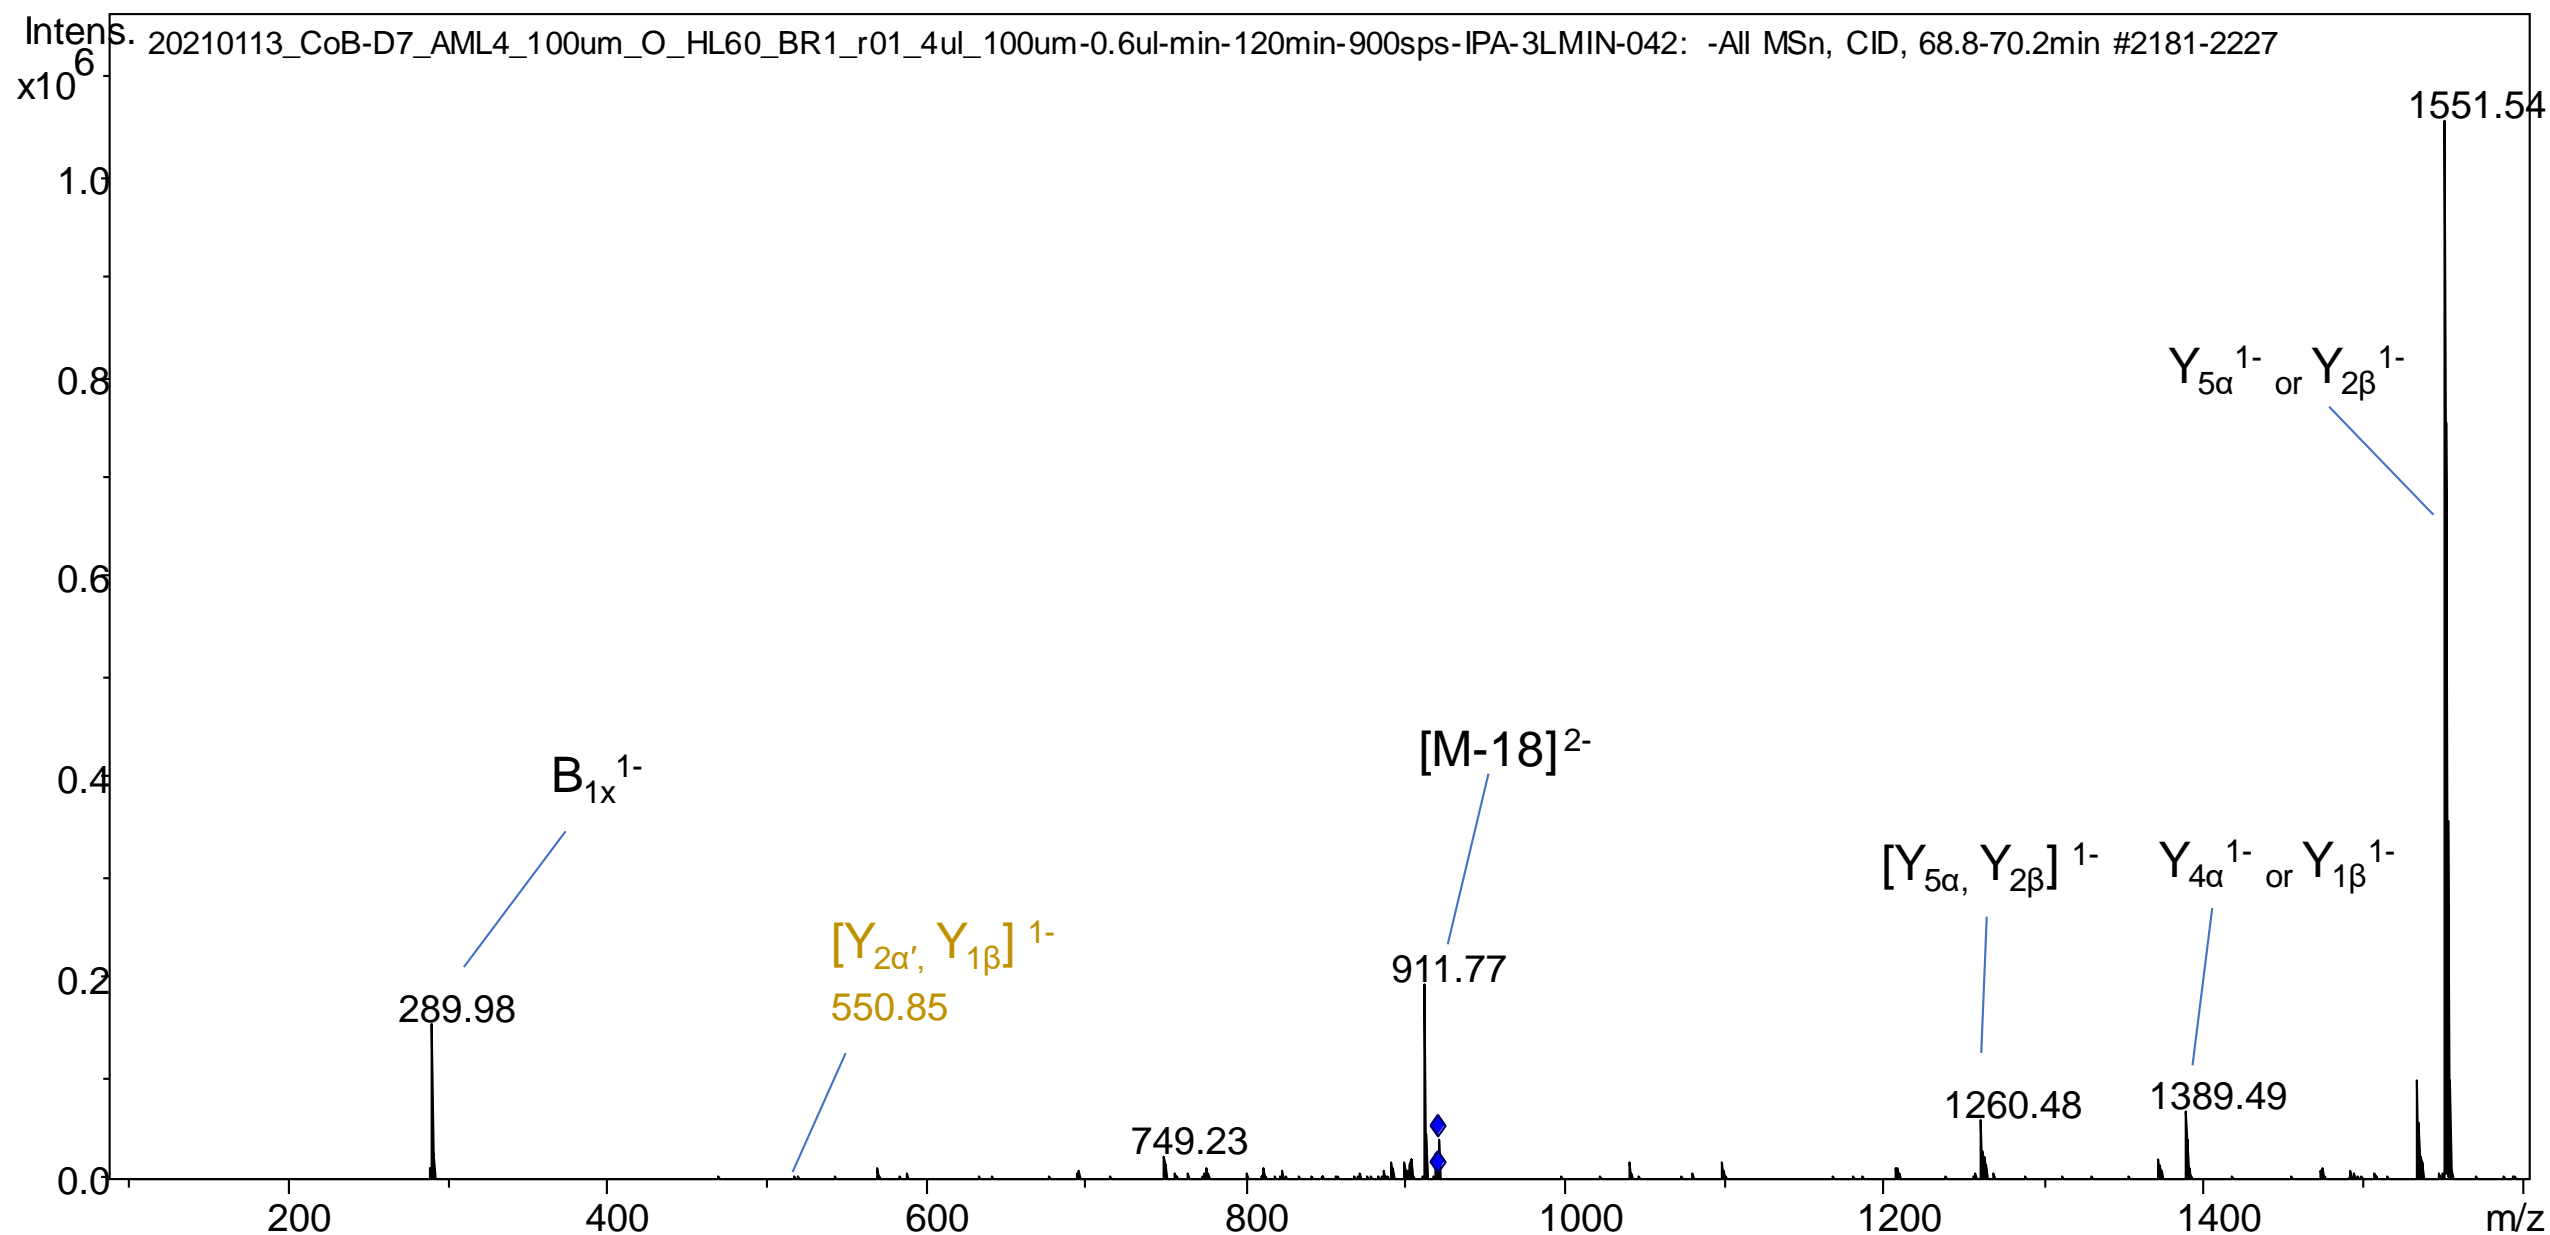

Supplement: s1 [file s1]
