# Supplementary material for: Integrated N- and O-Glycomics of Acute Myeloid Leukemia (AML) Cell Lines
Source: Cells. 2021 Nov 6;10(11):3058. doi: 10.3390/cells10113058 (PMC8616353; doi:10.3390/cells10113058)
Supplement: Supplementary file 1 [file cells-10-03058-s001.zip]

Archive with 4 entries (4 files):
- Supplementary_Excel_File.xlsx
- Supplementary_Figures_Tables.pdf
- Supplementary_Information_1.pdf
- Supplementary_Information_2.pdf
