# Supplementary material for: Integrated N- and O-Glycomics of Acute Myeloid Leukemia (AML) Cell Lines
Source: Cells. 2021 Nov 6;10(11):3058. doi: 10.3390/cells10113058 (PMC8616353; doi:10.3390/cells10113058)
Supplement: Supplementary file 1 [file cells-10-03058-s001.zip › Supplementary_Excel_File.xlsx]

## Sheet: Glycan features
Supplementary Excel Table 1: Identified N- and O-glycan structures and their contributions to specific glycan features. Glycan numbers correspond to the structural elucidation shown in Supplementary Information 1 and 2. Glycans are abbreviated according to their monosaccharide composition: hexose (H), N-acetylhexosamine (N), fucose (F), N-acetylneuraminic acid (S), phosphorylation (P), and sulfat…
Glycan Number	Abbreviation	Structure	Paucimannose	Oligomannose	Complex type	Hybrid type	Phosphorylation	Core fucosylation	Sialylation	(Sialyl) Lewis x/a	Bisection	Antennarity	2-3 Sialylation	2-6 Sialylation		Glycan Number	Abbreviation	Structure	T Antigen	Core 1	Core 2	(Sialyl) Lewis x/a	Lewis x/a	Sialyl Lewis x/a	H Antigen	2-3 Sialylation	2-6 Sialylation	2-8 Sialylation	Sulfation	LacNAc repeats
1	H2N2F1		1					1								1	H1N1		1	1
2	H3N2		1													2	H1N2				1
3	H3N2F1		1					1								3	H1N2Su1				1								1
4	H4N2		1													4a	H1N1S1a			1							1
5a	H5N2a			1												4b	H1N1S1b			1						1
5b	H5N2b			1												5	H2N2				1									1
6	H6N2			1												6	H2N2Su1				1								1	1
7	H7N2			1												7	H1N2S1				1					1
8	H8N2			1												8	H2N2F1					1	1
9	H9N2			1												9	H1N1S2			1						1	1
10a	H5N2P1a			1			1									10a	H2N2S1a				1					1				1
10b	H5N2P1b			1			1									10b	H2N2S1b				1					1				1
11a	H6N2P1a			1			1									11	H3N3				1									2
11b	H6N2P1b			1			1									12a	H2N2F1S1a				1	1		1		1				1
12	H7N2P1			1			1									12b	H2N2F1S1b				1				1	1				1
13	H7N2P2			1			2									13	H1N1S3			1							1	1
14	H3N4F1				1			1								14	H2N2S2				1					2				1
15	H4N4F1				1			1								15	H2N2S2Su1				1					2			1	1
16	H5N4F1				1			1								16	H2N2F1S2				1	1		1		2				1
17a	H5N4S1a				1				1					1		17	H2N2F1S2Su1				1	1		1		2			1	1
17b	H5N4S1b				1				1				1			18a	H3N3S2a				1									2
18a	H5N4F1S1a				1				1	1				1		18b	H3N3S2b				1					2				2
18b	H5N4F1S1b				1				1					1		19	H3N3F1S2				1	1		1						2
18c	H5N4F1S1c				1				1				1
19	H6N5F1				1			1				1
20a	H5N4S2a				1				2					2
20b	H5N4S2b				1				2				1	1
20c	H5N4S2c				1				2				2
21	H5N4F2S1				1			1	1	1				1
22a	H5N4F1S2a				1			1	2					2
22b	H5N4F1S2b				1			1	2				1	1
22c	H5N4F1S2c				1			1	2				2
23	H6N5F1S1				1			1	1
24a	H5N4F2S2a				1			1	2	1
24b	H5N4F2S2b				1			1	2	1
24c	H5N4F2S2c				1			1	2	1
25	H7N6F1				1			1				2
26a	H6N5S2a				1				2			1		2
26b	H6N5S2b				1				2			1	1	1
26c	H6N5S2c				1				2			1	2
27a	H6N5F1S2a				1			1	2			1
27b	H6N5F1S2b				1			1	2			1
27c	H6N5F1S2c				1			1	2			1
28a	H6N5S3a				1				3			1	1	2
28b	H6N5S3b				1				3			1	2	1
29a	H6N6F1S2a				1			1	2			2
29b	H6N6F1S2b				1			1	2			2
30a	H6N5F1S3a				1			1	3			1
30b	H6N5F1S3b				1			1	3			1
31a	H6N5S4a				1				4			1	1	3
31b	H6N5S4b				1				4			1	2	2
32	H6N6F1S3				1			1	3			2
33a	H7N6F1S4a				1			1	4			2
33b	H7N6F1S4b				1			1	4			2
34a	H5N5F1S1a				1			1	1		1			1
34b	H5N5F1S1b				1			1	1		1		1
35a	H5N5F1S2a				1			1	2		1			2
35b	H5N5F1S2b				1			1	2		1		1	1
35c	H5N5F1S2c				1			1	2		1		2
36a	H3N3F1a					1		1
36b	H3N3F1b					1		1
37	H6N3					1
38	H6N3P1					1	1
39a	H4N3F1S1a					1		1	1					1
39b	H4N3F1S1b					1		1	1				1
39c	H4N3F1S1c					1		1	1					1
40a	H6N3S1a					1			1					1
40b	H6N3S1b					1			1				1

## Sheet: N-glycans
Supplementary Excel Table 2: N-glycan expression in AML cell lines. Fractional abundances in percent of N-glycans in all AML cell lines investigated. Values of "0" were imputed as "0.01".
Glycans	OCI-AML3 - Fract. Abund. [%]	OCI-AML2 - Fract. Abund. [%]	Molm-14 - Fract. Abund. [%]	THP-1 - Fract. Abund. [%]	KG-1 - Fract. Abund. [%]	NB-4 - Fract. Abund. [%]	U-937 - Fract. Abund. [%]	MV4-11 - Fract. Abund. [%]	HL-60 - Fract. Abund. [%]	ME-1 - Fract. Abund. [%]	HEL - Fract. Abund. [%]	AML-193 - Fract. Abund. [%]	HEL92.1 - Fract. Abund. [%]	MOLM-13 - Fract. Abund. [%]	TF-1 - Fract. Abund. [%]	Kasumi-1 - Fract. Abund. [%]	PLB-985 - Fract. Abund. [%]	EOL-1 - Fract. Abund. [%]	KG-1a - Fract. Abund. [%]	M07e - Fract. Abund. [%]	ML-1 - Fract. Abund. [%]
H2N2F1	2.97261	4.9793	5.06237	3.09833	5.4713	1.77887	4.58184	0.815375	1.50931	4.48266	1.73061	4.51141	1.70612	11.1773	2.2416	3.98355	1.40651	3.26751	0.766868	2.65273	4.50279
H3N2	0.800332	1.00703	1.30935	0.79835	0.861045	0.01	0.705681	0.01	0.01	0.444983	0.536457	0.573839	0.636087	1.08406	0.330057	0.483554	0.421573	0.928716	0.536769	0.626103	0.714733
H3N2F1	3.98581	3.90792	4.28704	4.60025	3.311	2.15736	5.20041	2.14014	1.33657	3.06521	5.00255	4.21335	4.54947	4.55992	3.73844	3.35617	2.22171	2.93373	2.49804	5.94222	6.98135
H4N2	0.629015	0.620755	1.7402	0.611333	0.774507	0.264247	0.568704	0.431936	0.01	0.879365	0.768932	0.693884	0.953225	0.922696	0.671461	0.695495	0.605611	0.983294	0.41505	0.465256	0.857987
H5N2a	0.362239	0.38912	0.454932	0.433064	0.01	0.311599	0.01	0.379206	0.262765	0.941292	0.371264	0.391534	0.312736	0.365697	0.32979	1.89772	0.355692	0.339869	0.363515	0.27694	0.732795
H5N2b	5.66411	5.78745	5.1181	6.38928	9.00246	5.35414	5.3918	8.94307	6.6481	4.66106	11.0726	7.72608	14.2504	7.153	9.92067	6.10729	7.24442	11.6849	3.24568	4.9365	7.18283
H6N2	12.076	9.38659	10.6029	8.99335	4.11869	10.3129	10.9043	9.56256	11.6276	10.8888	7.29103	7.95878	6.63275	7.7669	7.12196	9.12213	14.4117	6.18256	5.15576	9.11511	14.2215
H7N2	8.29252	6.96347	7.24214	7.51246	3.28184	6.95158	6.97455	11.0882	11.0179	8.92698	6.37999	6.75916	6.71131	7.38777	7.04712	7.75966	9.76984	5.54572	5.15217	7.71513	8.85189
H8N2	9.51099	10.5366	10.0822	10.7214	4.737	13.8238	10.1663	13.8635	13.4936	13.8374	7.69071	11.8593	9.07536	9.11413	10.5088	9.89404	12.7175	9.0641	8.41041	10.3925	13.1345
H9N2	12.0949	14.367	15.2037	9.55266	5.01495	13.3355	11.8086	8.97858	16.3306	15.9274	11.5427	13.5311	13.1236	10.652	12.974	12.6711	15.0045	16.4184	10.2111	11.6408	10.7321
H5N2P1a	0.240396	1.53331	0.01	1.00743	0.949899	0.621642	0.608181	0.432391	0.492332	1.64446	0.742189	1.05849	0.837045	0.560906	0.202499	1.55908	0.378686	0.327047	0.487541	0.702397	1.27226
H5N2P1b	0.01	0.239873	0.01	0.01	0.704605	0.296716	0.540086	0.256064	0.403253	0.209806	0.01	0.27347	0.01	0.432229	0.01	0.479459	0.01	0.01	0.01	0.01	0.454452
H6N2P1a	1.68482	2.75589	3.11699	3.2658	1.8607	1.67637	2.59208	1.31717	2.66218	1.89508	2.14854	2.93813	1.98749	2.5504	0.741198	0.627802	1.18962	1.34823	0.688052	0.893528	2.38346
H6N2P1b	0.01	1.12296	0.01	1.27649	2.84323	1.44288	1.9144	0.575551	0.670254	0.812852	1.24138	2.12735	1.27893	0.963682	0.01	0.765591	0.405317	0.503783	1.24705	1.02901	2.15978
H7N2P1	1.48703	1.44697	1.9675	2.67454	1.52174	2.12346	2.48382	0.418953	1.5585	1.72166	2.40203	1.73478	1.94137	1.28512	0.732805	1.14062	1.04395	0.01	1.7475	1.42475	2.96455
H7N2P2	0.01	0.801521	0.01	1.09644	2.08632	2.67299	2.79265	0.663026	2.13094	1.05849	1.23084	1.76251	1.11073	0.572706	0.547157	1.09758	0.555748	0.509555	3.01853	1.34577	3.32728
H3N4F1	0.516888	0.658699	0.01	0.01	0.887156	0.802831	0.23519	1.57516	0.676988	1.04569	1.9925	0.590564	1.84607	0.224363	1.54423	0.335624	2.47586	0.01	0.178961	0.944412	1.81617
H4N4F1	0.168107	0.01	0.01	0.01	0.770924	0.01	0.01	0.01	0.358478	0.376628	0.26453	0.01	0.305173	0.01	0.181049	0.01	0.01	0.01	0.01	0.01	0.01
H5N4F1	1.94649	0.01	0.01	0.520108	0.630109	0.01	0.65707	0.210885	0.01	0.01	0.01	0.01	0.01	0.52899	0.01	0.318128	0.01	0.01	0.373003	0.01	0.01
H5N4S1a	1.38354	1.21971	2.27971	1.62399	1.77678	1.38762	1.95287	0.848601	0.801491	1.17383	1.52559	0.958253	1.08863	1.70433	0.904584	1.3975	1.0018	2.06303	1.43184	0.932085	0.01
H5N4S1b	1.1504	0.284941	0.01	0.752221	0.01	0.316602	0.01	0.01	0.01	0.230976	0.624161	0.45054	0.472897	0.494343	0.340659	0.275285	0.01	0.519357	0.836382	0.623745	0.01
H5N4F1S1a	0.01	0.333645	0.01	0.438163	0.476906	0.01	0.423594	0.01	0.01	0.241405	0.01	0.538376	0.01	0.615	0.01	0.403049	0.01	0.01	0.375753	0.01	0.01
H5N4F1S1b	2.47591	3.15033	3.03159	2.38666	1.57711	0.829561	4.79911	0.01	1.12218	1.3773	1.31901	1.23198	0.599917	3.81996	1.40955	4.09673	0.762027	4.31679	2.56608	3.52364	0.833073
H5N4F1S1c	2.88811	0.489555	0.01	1.06304	0.555408	0.462597	0.270195	0.01	0.458078	0.232097	0.566372	0.375182	0.775697	0.961169	0.727926	0.541559	0.01	0.843035	1.3766	1.47488	0.01
H6N5F1	1.11283	0.01	0.01	0.572973	0.632519	0.01	0.937748	0.473817	0.568686	0.01	0.01	0.4725	0.01	0.01	0.01	0.01	0.822157	0.01	0.01	0.01	0.01
H5N4S2a	2.33947	1.55486	2.84526	2.28944	5.93555	2.49945	1.9647	3.86244	1.1955	1.54093	4.59996	1.93107	1.89656	1.71428	3.02139	2.01711	2.2822	2.37399	2.08012	1.47703	1.07826
H5N4S2b	4.17277	2.139	4.70569	3.91754	8.75846	4.4809	2.14945	5.90108	2.48941	2.29073	4.62442	3.31589	3.94053	2.92141	2.6163	3.34268	3.85872	3.93679	4.2827	2.50857	1.96338
H5N4S2c	0.93578	0.334606	0.01	0.820417	0.01	0.530437	0.01	0.62237	0.01	0.303205	1.03041	0.01	0.821386	0.458484	0.57721	0.299336	0.564242	0.58993	1.44584	1.05636	0.01
H5N4F2S1	1.22301	1.80402	3.12893	1.87762	0.01	0.515154	1.60567	0.444379	0.962646	0.353839	0.01	1.08666	0.01	2.83722	0.01	1.60415	0.968561	1.16975	1.06001	0.01	0.01
H5N4F1S2a	0.01	1.71195	1.05831	0.584684	0.01	0.639319	1.69789	0.01	0.01	0.90865	0.657192	0.01	0.01	1.09785	1.24609	2.35591	0.01	1.559	0.01	0.779366	0.01
H5N4F1S2b	1.89525	3.30385	2.44892	2.76474	0.982056	1.11247	1.01029	0.278278	1.02279	1.67621	1.99547	1.59027	1.27579	2.53791	3.93746	3.93431	0.01	3.48036	4.93047	4.88306	0.941447
H5N4F1S2c	2.68554	0.674716	0.01	1.45255	0.729184	0.87977	0.01	0.496092	0.460478	0.452708	1.82708	0.592403	1.94923	0.843955	1.35331	0.555229	0.551181	1.12843	5.27782	3.96178	0.665802
H6N5F1S1	0.01	0.01	0.01	0.01	0.01	0.01	0.01	0.01	0.01	0.01	0.01	0.01	0.01	0.01	0.01	0.01	0.01	0.01	0.01	0.588129	0.01
H5N4F2S2a	0.610004	0.445396	0.716247	0.482475	0.01	0.01	0.01	0.01	0.474032	0.604787	0.01	0.808913	0.01	0.611395	0.01	0.203983	0.01	0.65487	1.09828	1.18619	0.355534
H5N4F2S2b	0.01	0.01	0.01	0.01	0.01	0.270088	0.01	0.01	0.01	0.01	0.01	0.01	0.01	0.39933	0.01	0.01	0.01	0.01	1.16206	0.97199	0.01
H5N4F2S2c	0.37703	0.01	0.01	0.01	0.01	0.01	0.01	0.01	0.01	0.01	0.01	0.01	0.01	0.01	0.258678	0.01	0.01	0.01	0.662962	0.592984	0.01
H7N6F1	0.01	0.01	0.01	0.01	0.01	0.01	0.85332	0.335956	0.864954	0.01	0.01	0.01	0.01	0.01	0.01	0.01	0.657649	0.01	0.01	0.769807	0.01
H6N5S2a	0.01	0.411202	0.01	0.01	1.18102	0.527584	0.809422	0.950414	0.01	0.380758	0.01	0.01	0.463136	0.01	0.01	0.303667	0.583562	0.01	0.592233	0.01	0.241504
H6N5S2b	1.03124	0.759057	1.24289	0.952465	2.95448	1.04164	0.804491	1.56546	0.01	0.677342	1.05783	0.96767	0.807154	0.567127	0.607021	1.05428	0.656417	1.19036	1.40479	0.01	0.57927
H6N5S2c	0.01	0.01	0.01	0.01	1.57982	0.666999	0.710416	1.09157	0.01	0.468069	0.01	0.01	0.01	0.01	0.01	0.01	0.877885	0.01	1.72813	0.01	0.01
H6N5F1S2c	0.01	0.476089	0.01	0.01	0.01	0.01	0.01	0.01	0.01	0.01	0.01	0.01	0.01	0.312749	0.01	0.01	0.01	0.01	0.01	0.864075	0.01
H6N5F1S2a	0.545103	0.979383	0.977072	0.751451	0.01	0.01	0.01	0.01	0.01	0.555692	0.01	0.74871	0.01	0.01	1.26029	1.22628	0.01	1.98709	0.974303	0.01	0.01
H6N5F1S2b	1.40913	0.01	0.01	0.432775	0.01	0.01	0.01	0.01	0.01	0.01	0.01	0.01	0.542838	0.01	0.612082	0.01	0.01	0.65709	1.38804	0.569392	0.44065
H6N5S3a	2.3308	1.66741	4.17845	3.4719	7.03099	3.52011	1.71805	6.53188	2.03204	1.96641	2.71349	2.30245	2.86574	1.95849	1.11525	2.57271	3.95202	2.36677	3.4116	1.55492	1.19689
H6N5S3b	3.99455	1.95218	5.20427	4.37	9.41763	5.09911	2.38846	8.39514	2.88957	2.80144	4.0747	3.69047	3.91788	3.05891	1.56691	3.47846	5.40728	3.78225	4.69051	2.34596	1.64961
H6N6F1S2a	0.01	0.01	0.01	0.01	0.01	0.01	0.01	0.01	0.01	0.423987	0.01	0.01	0.01	0.01	1.00916	0.01	0.01	0.01	0.01	0.01	0.01
H6N6F1S2b	0.01	0.01	0.01	0.01	0.01	0.01	0.01	0.01	0.795272	0.01	0.67175	0.01	0.635052	0.01	0.777254	0.01	0.01	0.01	0.01	0.01	0.01
H6N5F1S3a	0.01	0.366457	0.01	0.317767	0.01	0.01	0.01	0.01	0.01	0.208628	0.01	0.284465	0.01	0.204566	1.28613	0.580782	0.01	0.700716	0.871558	0.01	0.01
H6N5F1S3b	0.348102	0.197476	0.01	0.379208	0.01	0.01	0.01	0.01	0.01	0.01	0.408414	0.01	0.43578	0.01	0.451228	0.01	0.01	0.01	3.07081	0.01	0.01
H6N5S4a	0.577979	0.381705	0.01	0.533336	1.06411	1.26679	0.503025	1.52033	0.545425	0.482077	0.986028	0.578656	0.75492	0.398692	0.470029	0.584281	1.0953	0.577188	0.639215	0.37826	0.404979
H6N5S4b	1.11452	0.808147	0.01	1.0662	2.62352	1.43682	0.439231	2.33006	0.685982	0.617292	1.22152	0.924542	1.53072	1.04022	0.358178	1.13134	1.71121	0.999836	0.587137	0.60821	0.583457
H6N6F1S3	0.01	0.01	0.01	0.01	0.01	0.01	0.01	0.01	0.01	0.01	0.01	0.01	0.01	0.01	0.621063	0.01	0.01	0.01	0.01	0.01	0.01
H7N6F1S4a	0.01	0.348594	0.01	0.01	0.01	0.345132	0.01	0.01	0.01	0.374898	0.01	0.849222	0.01	0.01	1.16428	0.599279	0.01	0.674501	1.03577	0.773456	0.617982
H7N6F1S4b	0.279641	0.491449	0.01	0.01	0.01	0.766326	0.01	0.01	0.01	0.48844	0.01	1.56659	0.924941	0.01	1.00248	0.373501	0.01	0.01	3.78575	2.08071	0.983248
H5N5F1S1a	0.01	0.846503	0.01	0.01	1.16156	0.986088	0.01	0.01	1.99295	1.06194	0.641515	0.741305	0.323857	0.01	1.95564	0.01	0.01	0.01	0.01	0.590474	0.01
H5N5F1S1b	0.01	0.226293	0.01	0.01	0.606798	0.01	0.01	0.01	1.39315	0.216366	0.384728	0.39443	0.612007	0.01	0.296852	0.01	0.01	0.01	0.01	0.442096	0.01
H5N5F1S2a	0.01	0.451451	0.01	0.01	0.01	3.0195	0.01	0.01	0.632985	0.745397	0.01	0.01	0.01	0.01	1.73869	0.01	0.01	0.01	0.01	0.01	0.01
H5N5F1S2b	0.01	0.355431	0.01	0.01	0.395468	0.211819	0.01	0.01	3.08778	1.00745	0.595423	0.434579	0.721247	0.01	2.32499	0.01	0.01	0.01	0.01	0.680002	0.01
H5N5F1S2c	0.01	0.397882	0.01	0.01	0.01	0.01	0.01	0.01	2.15162	0.243782	0.656465	0.01	0.944762	0.01	0.99029	0.01	0.01	0.01	0.01	0.64156	0.01
H3N3F1a	0.01	0.01	0.01	0.01	0.01	0.325725	0.01	0.748795	0.01	0.01	0.780954	0.01	1.14568	0.01	0.843978	0.01	0.77178	0.01	0.01	0.01	0.461703
H3N3F1b	0.438555	0.668064	0.01	0.720611	0.595867	0.519014	0.660898	1.15951	0.420938	0.437795	0.919703	0.505252	0.778206	0.651216	0.618419	0.309174	1.76752	0.430424	0.01	0.01	1.28847
H6N3	0.409113	0.207224	0.01	0.378215	0.362198	0.1538	0.466524	0.01	0.492033	0.213275	0.309338	0.441713	0.359612	0.25192	0.345529	0.0850082	0.376166	0.678464	0.397154	0.216692	0.27336
H6N3P1	0.01	0.946971	0.01	0.952095	0.01	0.553867	0.739645	0.01	0.01	0.660442	0.366427	0.248984	0.01	0.364722	0.197051	0.362394	0.01	0.485422	0.623229	0.593697	0.760939
H4N3F1S1a	0.335486	1.02832	0.991379	0.663794	0.242957	0.359866	3.20608	0.01	0.01	0.47524	0.393968	1.0463	0.20591	1.22228	0.45943	2.67222	0.01	0.488276	0.173768	0.381514	0.560324
H4N3F1S1b	0.264422	0.274323	0.01	0.18684	0.01	0.01	0.245108	0.01	0.01	0.01	0.193241	0.01	0.176269	0.435772	0.202381	0.319365	0.01	0.01	0.01	0.01	0.28959
H4N3F1S1c	0.01	0.209082	0.01	0.32851	0.01	0.262918	0.01	0.01	0.142291	0.01	0.205087	0.45427	0.287274	0.572061	0.181607	0.01	0.01	0.01	0.217057	0.335058	0.553798
H6N3S1a	0.857761	1.255	1.00384	0.718299	0.53214	0.818956	1.51815	0.792058	0.85557	1.0319	1.71984	1.32587	0.913575	0.642821	1.65752	0.897085	0.892346	1.74159	0.517946	0.94522	0.6095
H6N3S1b	0.381666	0.343312	0.01	0.198723	0.01	0.267091	0.01	0.01	0.282797	0.254917	0.52104	0.438741	0.574973	0.01	0.660215	0.128775	0.231824	0.567275	0.808088	0.565952	0.37682
Glycan Features
Paucimannose	8.38777	10.515	12.2623	9.10827	10.4178	4.20048	11.0566	3.38745	2.84588	8.87221	8.03855	9.99249	7.8449	17.744	6.98156	8.51876	4.65541	8.11324	4.21672	9.6863	13.0569
Oligomannose	51.413	55.3307	53.7105	52.9229	36.1214	58.9236	56.1768	56.4783	67.298	62.5253	52.1133	58.1207	57.2617	48.8045	50.1261	53.122	63.0769	51.9242	39.7273	49.4724	67.4174
Complex type	37.5122	29.222	32.0533	33.8217	51.7276	33.6147	25.9302	37.4339	27.6625	25.529	34.4386	27.4257	30.4519	29.3107	37.7262	33.5852	28.2281	35.5711	53.3187	37.8031	14.3513
Hybrid type	2.687	4.93229	1.97386	4.14709	1.73316	3.26124	6.83641	2.70037	2.19363	3.07357	5.40959	4.46112	4.4415	4.1408	5.16613	4.77402	4.03963	4.39145	2.73724	3.03813	5.1745
Phosphorylation	3.41225	9.64902	5.64862	11.3692	12.0528	12.0609	14.4635	4.32618	10.0484	9.06129	9.36226	11.9062	8.2663	7.30246	2.96787	7.13011	4.12906	3.68359	10.8304	7.33491	16.65
Core fucosylation	26.478	28.4425	21.4476	23.1844	18.5494	16.2444	25.9608	8.67839	20.4322	20.8154	21.2066	22.4984	20.7413	32.998	34.4346	27.3659	12.405	24.2916	33.4682	35.6295	21.2919
Sialylation	70.8719	60.1249	66.3576	71.1497	116.058	79.0843	48.4027	91.8031	52.3214	53.9895	73.9466	64.3291	68.5269	57.6555	80.5584	73.5708	61.9089	76.3803	123.744	77.8127	34.653
(Sialyl) Lewis x/a	2.21004	2.58306	4.44604	2.79825	0.476906	0.785242	2.02927	0.444379	1.43668	1.20003	0.01	2.43395	0.01	4.46295	0.258678	2.21118	0.968561	1.82462	4.35906	2.75116	0.355534
Bisection	0.01	2.27756	0.01	0.01	2.16383	4.21741	0.01	0.01	9.25849	3.27494	2.27813	1.57031	2.60187	0.01	7.30646	0.01	0.01	0.01	0.01	2.35413	0.01
Antennae	13.0235	9.67919	11.4504	12.8481	26.4841	15.782	10.0175	23.5306	10.0422	10.7324	11.8055	14.8011	14.4381	7.54076	16.8756	12.8774	16.4211	13.6103	29.0014	14.1569	8.29882
2-3 Sialylation	32.1534	18.5599	22.6807	29.2591	51.0481	29.9063	13.7768	41.6675	23.6868	18.8076	31.8826	21.2632	31.3052	21.078	22.9909	23.682	28.0179	26.482	45.1487	30.3392	11.5501
2-6 Sialylation	30.673	32.7112	40.3278	36.4662	65.01	44.192	34.6258	50.1356	26.096	27.9337	39.4953	29.434	29.8588	33.3168	33.9903	41.3948	33.891	38.5	36.9107	27.6875	15.1056

## Sheet: O-glycans
Supplementary Excel Table 3: O-glycan expression in AML cell lines. Fractional abundances in percent of O-glycans in all AML cell lines investigated. Values of "0" were imputed as "0.01".
Glycan	OCI-AML3 - Fract. Abund. [%]	OCI-AML2 - Fract. Abund. [%]	Molm-14 - Fract. Abund. [%]	THP-1 - Fract. Abund. [%]	KG-1 - Fract. Abund. [%]	NB-4 - Fract. Abund. [%]	U-937 - Fract. Abund. [%]	MV4-11 - Fract. Abund. [%]	HL-60 - Fract. Abund. [%]	ME-1 - Fract. Abund. [%]	HEL - Fract. Abund. [%]	AML-193 - Fract. Abund. [%]	HEL92.1 - Fract. Abund. [%]	MOLM-13 - Fract. Abund. [%]	TF-1 - Fract. Abund. [%]	Kasumi-1 - Fract. Abund. [%]	PLB-985 - Fract. Abund. [%]	EOL-1 - Fract. Abund. [%]	KG-1a - Fract. Abund. [%]	M07e - Fract. Abund. [%]	ML-1 - Fract. Abund. [%]
H1N1	0.763875	0.556441	0.521097	0.965483	0.778526	0.563409	1.43254	1.70746	1.22708	0.772312	0.432373	0.714228	0.562938	0.594784	0.45294	0.602882	0.196795	0.626907	0.59464	0.76172	0.470823
H1N2	0.01	0.01	0.01	0.01	0.01	0.01	0.502773	0.783818	0.478209	0.01	0.01	0.01	0.01	0.01	0.01	0.01	0.01	0.01	0.01	0.01	0.01
H1N2Su1	0.01	0.01	0.01	0.01	0.01	0.01	0.01	0.803875	0.01	0.01	0.01	0.01	0.01	0.01	0.01	0.01	0.01	0.01	0.01	0.01	0.01
H1N1S1a	0.361713	0.01	0.01	0.62029	0.01	0.523065	6.35186	0.01	0.01	0.747557	1.52345	0.929599	1.80342	0.733361	2.21802	0.994837	0.01	0.399539	0.540262	0.01	0.548689
H1N1S1b	29.1071	10.9365	16.9827	17.2205	19.4329	24.7282	11.3312	24.6722	14.1682	26.8774	19.7934	10.8545	16.8787	20.3313	12.0342	24.2001	35.3064	16.9607	42.6078	20.7239	16.1494
H2N2	0.276521	0.701131	0.01	1.41984	4.61693	0.715223	12.2623	17.3491	9.19758	0.274528	0.932023	0.532782	0.527697	1.09903	0.652219	1.15943	0.01	1.32952	2.37133	0.890185	0.881511
H2N2Su1	0.01	0.01	0.01	0.01	0.01	0.01	2.63949	7.48587	1.59004	0.01	0.01	0.01	0.01	0.01	0.01	0.01	0.01	0.01	0.01	0.01	0.01
H1N2S1	0.46175	0.971959	0.649404	1.11984	0.53884	0.46165	2.43109	0.01	0.797264	1.13368	0.01	0.527906	0.453531	0.8653	0.718363	0.835768	0.01	1.20261	0.01	1.11644	0.642969
H2N2F1	0.01	0.01	0.01	0.01	0.01	0.01	1.44987	3.65303	1.41064	0.01	0.01	0.01	0.01	0.01	0.01	0.01	0.01	0.01	0.01	0.01	0.01
H1N1S2	31.32	22.8456	23.2074	25.024	25.2572	24.0438	22.3861	26.3242	12.6109	25.4983	44.79	31.468	36.3238	20.6566	39.3784	35.0321	46.9704	15.8648	34.5086	14.751	23.7309
H2N2S1a	5.89786	5.50221	4.46527	7.99701	7.87665	4.06866	32.4067	2.22664	5.43237	3.62972	1.84571	6.92395	2.07707	7.85147	3.1638	7.55058	0.01	7.94386	2.15314	4.38326	4.67776
H2N2S1b	0.973497	5.6347	3.1623	5.08932	3.38322	6.28178	0.01	3.05776	6.8861	2.687	2.16154	2.74563	5.54563	2.7501	4.8311	2.58215	0.01	4.23254	2.30403	5.01737	6.9231
H3N3	0.01	0.01	0.01	0.01	0.01	0.01	0.01	2.19753	1.05569	0.01	0.01	0.01	0.01	0.01	0.01	0.01	0.01	0.01	0.01	0.01	0.01
H2N2F1S1a	0.539131	0.938548	1.34687	0.822135	1.22301	0.700759	1.96081	2.32541	2.43182	0.346404	0.01	1.24932	0.01	0.843578	0.01	0.01	0.01	0.01	0.01	1.01463	0.01
H2N2F1S1b	0.01	0.01	0.01	0.01	0.01	1.1561	0.01	0.01	0.01	0.01	0.01	0.01	0.01	0.01	0.701548	0.01	0.01	0.01	0.01	0.01	1.46518
H1N1S3	0.01	0.01	0.01	0.01	0.01	0.01	0.01	0.01	0.01	3.6483	3.46663	0.01	4.85053	1.31631	5.37044	0.01	0.01	0.01	0.01	3.49217	1.16671
H2N2S2	26.0063	42.4224	41.1457	34.0428	29.5264	33.1176	4.8453	7.4131	31.7243	30.4367	22.4353	35.3711	27.1968	35.8823	25.4945	27.0421	17.5264	37.8663	14.5675	33.8281	38.1517
H2N2S2Su1	0.01	0.01	4.65662	0.01	1.33716	0.726307	0.01	0.01	0.01	1.459	0.01	0.564289	1.84258	1.679	2.922	0.01	0.01	0.01	0.01	2.77581	2.06046
H2N2F1S2	2.3923	3.32428	3.86267	0.01	3.81743	2.91347	0.01	0.01	5.17247	2.48908	0.01	7.42006	0.01	3.03124	0.01	0.01	0.01	3.50476	0.352651	7.70901	3.13076
H2N2F1S2Su1	0.01	0.01	0.01	0.01	0.01	0.01	0.01	0.01	0.01	0.01	0.01	0.698642	0.01	0.01	0.01	0.01	0.01	0.01	0.01	3.53642	0.01
H3N3S2a	0.01	0.01	0.01	0.01	0.01	0.01	0.01	0.01	0.01	0.01	0.01	0.01	0.01	0.01	1.45512	0.01	0.01	0.01	0.01	0.01	0.01
H3N3S2b	1.21838	5.22218	0.01	5.67876	2.21172	0.01	0.01	0.01	3.11329	0.01	2.61953	0.01	1.93738	2.3656	0.607368	0.01	0.01	7.78859	0.01	0.01	0.01
H3N3F1S2	0.681491	0.944056	0.01	0.01	0.01	0.01	0.01	0.01	2.70406	0.01	0.01	0.01	0.01	0.01	0.01	0.01	0.01	2.27991	0.01	0.01	0.01
Glycan Features
T Antigen	0.763875	0.556441	0.521097	0.965483	0.778526	0.563409	1.43254	1.70746	1.22708	0.772312	0.432373	0.714228	0.562938	0.594784	0.45294	0.602882	0.196795	0.626907	0.59464	0.76172	0.470823
Core 1	60.7889	33.7821	40.1901	42.8648	44.6901	49.2951	40.0691	50.9964	26.7791	56.7716	69.5735	43.2521	59.8564	43.0376	59.0011	60.2271	82.2768	33.225	77.6567	38.967	41.5958
Core 2	38.4473	65.6614	59.2888	56.1697	54.5314	50.1415	58.4984	47.2962	71.9939	42.4561	29.9941	56.0337	39.5807	56.3676	40.546	39.17	17.5264	66.148	21.7486	60.2712	57.9334
(Sialyl) Lewis x/a	3.61292	5.20688	5.20953	0.822135	5.04044	3.61423	3.41067	5.97844	11.719	2.83549	0.01	9.36802	0.01	3.87482	0.01	0.01	0.01	5.78466	0.352651	12.2601	3.13076
Lewis x/a	0.01	0.01	0.01	0.01	0.01	0.01	1.44987	3.65303	1.41064	0.01	0.01	0.01	0.01	0.01	0.01	0.01	0.01	0.01	0.01	0.01	0.01
Sialyl Lewis x/a	3.61292	5.20688	5.20953	0.822135	5.04044	3.61423	1.96081	2.32541	10.3083	2.83549	0.01	9.36802	0.01	3.87482	0.01	0.01	0.01	5.78466	0.352651	12.2601	3.13076
H Antigen	0.01	0.01	0.01	0.01	0.01	1.1561	0.01	0.01	0.01	0.01	0.01	0.01	0.01	0.01	0.701548	0.01	0.01	0.01	0.01	0.01	1.46518
2-3 Sialylation	127.533	148.767	149.144	136.716	131.497	134.956	80.2065	73.4324	122.347	128.942	118.7	141.878	123.232	139.215	118.875	124.285	117.33	144.524	111.414	142.705	140.275
2-6 Sialylation	31.6818	22.8456	23.2074	25.6443	25.2572	24.5669	28.7379	26.3242	12.6109	29.8942	49.7801	32.3976	42.9777	22.7063	46.9668	36.027	46.9704	16.2643	35.0489	18.2432	25.4463
2-8 Sialylation	0.01	0.01	0.01	0.01	0.01	0.01	0.01	0.01	0.01	3.6483	3.46663	0.01	4.85053	1.31631	5.37044	0.01	0.01	0.01	0.01	3.49217	1.16671
Sulfation	0.01	0.01	4.65662	0.01	1.33716	0.726307	2.63949	8.28975	1.59004	1.459	0.01	1.26293	1.84258	1.679	2.922	0.01	0.01	0.01	0.01	6.31222	2.06046
LacNAc repeats	39.8854	70.8557	58.6394	60.7287	56.2043	49.6799	55.5645	47.906	77.5914	41.3224	32.6137	55.5058	41.0645	57.8679	41.8901	38.3342	17.5264	75.0139	21.7486	59.1548	57.2904

## Sheet: RSD_MOLM-14
Supplementary Excel Table 4: Technical and biological variability of N- and O-glycans exemplarily assessed for the MOLM-14 cell line. Fractional abundances of N- and O-glycans as well as corresponding mean values, standard deviations (SD), and relative standard deviations (RSD) determined for technical and biological triplicates are depicted. Displayed values correspond to Supplementary Figure 2.
O-Glycans - Technical Variability
Glycan	MOLM-14_bio_rep_1_tech_rep_1 [%]	MOLM-14_bio_rep_1_tech_rep_2 [%	MOLM-14_bio_rep_1_tech_rep_3 [%]	Mean [%]	SD [%]	RSD
H1N1	0.563195	0.410798	0.422328	0.46544	0.0848538	18.2309
H1N1S1b	17.0814	18.2755	17.7542	17.7037	0.598651	3.38151
H1N2S1	0.608942	0.552268	0.219221	0.460143	0.21056	45.7597
H1N1S2	23.1123	24.0022	23.3837	23.4994	0.456093	1.94087
H2N2S1a	3.43529	4.22878	4.27209	3.97872	0.471126	11.8412
H2N2S1b	3.23098	3.27517	2.74789	3.08468	0.292504	9.48247
H2N2F1S1a	1.44326	1.2516	1.47929	1.39138	0.122389	8.79624
H2N2S2	42.7651	39.4953	40.2752	40.8452	1.70778	4.18109
H2N2S2Su1	4.13483	4.64729	5.66062	4.81424	0.776473	16.1287
H2N2F1S2	3.62479	3.86114	3.78544	3.75712	0.120695	3.21242
O-Glycans - Biological Variability
Glycan	MOLM-14_bio_rep_1 [%]	MOLM-14_bio_rep_2 [%]	MOLM-14_bio_rep_3 [%]	Mean [%]	SD [%]	RSD
H1N1	0.46544	0.541032	0.556818	0.521097	0.0488418	9.37288
H1N1S1b	17.7037	16.6862	16.5581	16.9827	0.627696	3.6961
H1N2S1	0.460143	0.722843	0.765226	0.649404	0.165269	25.4493
H1N1S2	23.4994	22.7944	23.3286	23.2074	0.367791	1.5848
H2N2S1a	3.97872	4.91076	4.50633	4.46527	0.467377	10.4669
H2N2S1b	3.08468	3.35639	3.04582	3.1623	0.169206	5.35074
H2N2F1S1a	1.39138	1.36286	1.28636	1.34687	0.0543068	4.03208
H2N2S2	40.8452	42.1698	40.422	41.1457	0.911841	2.21613
H2N2S2Su1	4.81424	3.73816	5.41745	4.65662	0.85067	18.268
H2N2F1S2	3.75712	3.71753	4.11335	3.86267	0.217997	5.64369
N-Glycans - Technical Variability
Glycan	MOLM-14_bio_rep_1_tech_rep_1 [%]	MOLM-14_bio_rep_1_tech_rep_2 [%]	MOLM-14_bio_rep_1_tech_rep_3 [%]	Mean [%]	SD [%]	RSD
H2N2F1	4.63699	4.8589	4.95226	4.81605	0.161947	3.36266
H3N2	1.18337	1.41932	1.42404	1.34224	0.137608	10.2521
H3N2F1	3.70065	4.11971	3.69846	3.8396	0.242579	6.31782
H4N2	1.51458	1.68165	1.65202	1.61608	0.0891454	5.51614
H5N2a	0.447916	0.275784	0.357526	0.360409	0.0861022	23.8901
H5N2b	5.49881	4.45776	5.17164	5.04273	0.532363	10.557
H6N2	10.4588	9.25973	9.5564	9.75832	0.624529	6.39997
H7N2	6.89266	5.60408	6.29903	6.26526	0.644954	10.2941
H8N2	10.0734	10.0449	9.76352	9.96058	0.171258	1.71935
H9N2	14.482	15.867	14.8541	15.0677	0.71678	4.75707
H6N2P1a	3.2624	2.77514	2.71562	2.91772	0.299985	10.2815
H6N2P1b	0.824032	0.659065	0.609295	0.697464	0.112401	16.1156
H7N2P1	2.11114	2.2581	2.00076	2.12334	0.129104	6.08025
H7N2P2	0.0355472	0.715228	0.451318	0.400698	0.342656	85.5149
H5N4S1a	2.42904	1.96615	2.50239	2.2992	0.290748	12.6456
H5N4F1S1a	1.10756	1.04737	1.34688	1.16727	0.158434	13.573
H5N4F1S1b	2.92803	3.16008	2.98514	3.02442	0.12091	3.99779
H5N4S2a	3.01039	2.64321	2.9316	2.86173	0.193299	6.75462
H5N4S2b	4.92809	4.58648	5.17415	4.89624	0.295123	6.02754
H5N4F2S1	3.12388	3.67707	2.92113	3.24069	0.391275	12.0738
H5N4F1S2a	0.966482	1.12378	1.06686	1.05237	0.079641	7.56776
H5N4F1S2b	2.51381	2.57803	2.18498	2.42561	0.210849	8.69263
H5N4F2S2a	0.594547	1.1356	0.680903	0.803685	0.290675	36.1678
H6N5S2b	1.34389	1.58878	1.87873	1.6038	0.267733	16.6937
H6N5F1S2a	0.89192	0.791479	0.770367	0.817922	0.0649478	7.94058
H6N5S3a	4.13003	3.93323	4.17051	4.07792	0.126933	3.11269
H6N5S3b	5.34597	5.91255	5.82906	5.69586	0.305875	5.37012
H4N3F1S1a	0.831987	0.975696	1.0251	0.944261	0.100321	10.6243
H6N3S1a	0.732146	0.884183	1.02624	0.880855	0.147073	16.6966
N-Glycans - Biological Variability
Glycan	MOLM-14_bio_rep_1 [%]	MOLM-14_bio_rep_2 [%]	MOLM-14_bio_rep_3 [%]	Mean [%]	SD [%]	RSD
H2N2F1	4.73003	5.91384	4.54324	5.06237	0.743286	14.6826
H3N2	1.20712	1.57511	1.14582	1.30935	0.232185	17.7329
H3N2F1	3.7749	5.5792	3.50701	4.28704	1.12703	26.2893
H4N2	1.54497	2.03328	1.64235	1.7402	0.258441	14.8512
H5N2a	0.456904	0.629696	0.278197	0.454932	0.175758	38.6338
H5N2b	5.60915	4.97799	4.76715	5.1181	0.438135	8.56051
H6N2	10.6687	11.3185	9.8215	10.6029	0.750676	7.07991
H7N2	7.03097	7.69652	6.99894	7.24214	0.393827	5.43798
H8N2	10.2755	10.3684	9.60272	10.0822	0.417826	4.1442
H9N2	14.7726	13.9709	16.8677	15.2037	1.49572	9.83788
H6N2P1a	3.32787	3.19509	2.82802	3.11699	0.258913	8.30651
H7N2P1	2.1535	1.69447	2.05453	1.9675	0.241577	12.2783
H5N4S1a	2.47778	1.96981	2.39155	2.27971	0.271827	11.9237
H5N4F1S1b	2.98678	2.83559	3.2724	3.03159	0.221825	7.31712
H5N4S2a	3.07079	2.18881	3.27619	2.84526	0.577711	20.3043
H5N4S2b	5.02698	4.20519	4.88489	4.70569	0.439225	9.33392
H5N4F2S1	3.18656	2.81589	3.38434	3.12893	0.288576	9.22284
H5N4F1S2a	0.985875	1.07998	1.10906	1.05831	0.0643901	6.08426
H5N4F1S2b	2.56425	2.38762	2.39489	2.44892	0.0999432	4.08111
H5N4F2S2a	0.606477	0.941264	0.601001	0.716247	0.194889	27.2098
H6N5S2b	1.37086	1.25925	1.09856	1.24289	0.136886	11.0135
H6N5F1S2a	0.909817	1.108	0.913396	0.977072	0.113403	11.6064
H6N5S3a	4.2129	3.6372	4.68524	4.17845	0.524868	12.5613
H6N5S3b	5.45324	4.10786	6.0517	5.20427	0.99555	19.1295
H4N3F1S1a	0.848681	1.29	0.835456	0.991379	0.258697	26.0947
H6N3S1a	0.746837	1.22051	1.04417	1.00384	0.239399	23.8483

## Sheet: TFs
Supplementary Excel Table 5: Transcriptomics data of selected hematopoietic transcription factors. Expression values were obtained from the “Expression Public 21Q1” dataset accessed via the depmap portal (Broad Institute, Cambridge, MA, USA).
Cell Line	CBFA2T3	CEBPA	TAL1	GATA1	GATA2	GATA3	SPI1
AML193	5.0387	7.37173	0.704872	0.176323	2.07039	2.40871	8.28388
EOL1	4.46009	6.43563	0.0285692	0.0703893	2.70929	0.214125	7.37156
HEL	6.57546	0.344828	7.2318	7.29297	9.15246	0.400538	6.7097
HEL9217	6.52435	1.38957	7.37521	7.4307	8.35826	0.454176	5.3572
HL60	3.7666	7.13371	0.0143553	0.137504	3.46074	0.0285692	7.24831
KASUMI1	3.05832	2.45418	1.09761	0	3.85997	0.0703893	6.44774
KG1	5.37016	4.91839	3.21723	0.815575	7.99791	0.214125	6.63648
M07E	6.22554	0.238787	6.25663	6.36194	7.57319	3.37156	4.74685
ME1	4.92932	6.10245	4.80993	0.970854	5.78921	2.28392	6.9735
MOLM13	3.58496	7.2589	0.0285692	0.201634	6.1639	0.0703893	6.91133
MOLM14	2.60644	5.61971	0.0143553	0.722466	4.86839	0.0426443	7.0119
MV411	5.32481	6.74066	0.0703893	0	4.13175	0.0285692	7.44286
NB4	5.3345	5.95327	0.111031	0.731183	5.10056	0.124328	6.91145
OCIAML2	3.72901	6.29957	0.0565835	0.0976108	3.86691	0.0426443	7.33896
OCIAML3	3.25399	8.23146	2.76341	0	3.61471	0.163499	7.68313
PLB985	1.99277	5.75729	0.0703893	0.0703893	3.66221	0.0143553	7.20692
TF1	5.80064	2.30451	6.33682	6.5281	8.27347	2.28688	5.79883
THP1	4.41616	7.90569	0.163499	0.0426443	3.94298	0.163499	7.39421
U937	2.87578	6.7343	0.163499	0.0143553	1.55582	0.782409	6.41988
